# Supplementary material for: Co-cultures of colon cancer cells and cancer-associated fibroblasts recapitulate the aggressive features of mesenchymal-like colon cancer
Source: PubMed Central journal article supplement (PMC10228738; doi:10.3389/fimmu.2023.1053920), 2023-05-16
Supplement: DataSheet_1.pdf [file DataSheet_1.pdf]

Table S1.

| Medium type                  | Component                         | Source (catalog number)                                     | Concentration |
|------------------------------|-----------------------------------|-------------------------------------------------------------|---------------|
| <b>Basal organoid medium</b> | Advanced-DMEM /F12                | Gibco (12634-010)                                           | 1x            |
|                              | HEPES buffer                      | Lonza (17737E)                                              | 10 mM         |
|                              | Penicillin/Streptomycin           | Gibco (15070-063)                                           | 50 U/ml       |
|                              | GlutaMAX                          | Gibco (35050-038)                                           | 2 mM          |
| <b>Full organoid medium</b>  | Basal organoid medium             |                                                             | 1x            |
|                              | Noggin conditioned medium         | 293T-mNoggin-Fc cell line                                   | 100 ng/ml     |
|                              | B27                               | Invitrogen (17504-044)                                      | 1x            |
|                              | N-acetylcysteine (NAC)            | Sigma-Aldrich (A9165)                                       | 1 mM          |
|                              | A83-01                            | SignalChem (A09-900-05)                                     | 500 nM        |
|                              | SB202190                          | Gentaur (A1632)                                             | 10 $\mu$ M    |
| <b>CAF medium</b>            | DMEM high glucose                 | Gibco (D6429)                                               | 1x            |
|                              | Penicillin/Streptomycin           | Gibco (15070-063)                                           | 50 U/ml       |
|                              | FCS                               | Bodinco BV, the Netherlands                                 | 10%           |
| <b>Co-culture medium</b>     | Basal organoid medium             |                                                             | 1x            |
|                              | B27                               | Invitrogen (17504-044)                                      | 1x            |
|                              | FGF                               | ATCC (PCS-201-040)                                          | 5 ng/ml       |
|                              | Insulin                           | ATCC (PCS-201-040)                                          | 5ug/ml        |
|                              | PDGF-AB                           | Sigma Aldrich (P3326)                                       | 50ng/ml       |
| <b>T cell medium</b>         | RPMI 1640 with GlutaMAX and HEPES | Fisher Scientific (11554526)                                | 1x            |
|                              | Human serum                       | the Dutch blood bank "Sanquin", 10 pooled donors (E8683R00) | 5%            |
|                              | Penicillin/Streptomycin           | Gibco (11548876)                                            | 1%            |
|                              | Betamercaptoethanol               | Gibco (11528926)                                            | 50uM          |

Table S1. Components and concentrations of the used culture media.

## Supplemental figure 1.

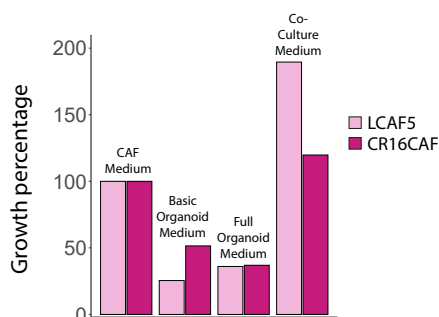

Figure S1. Cell Titer Glo assay showing the relative viability of LCAF5 and CR16CAF cultured in different media. The viability of the CAFs grown in CAF medium was set to 100%.

## Supplemental figure 2.

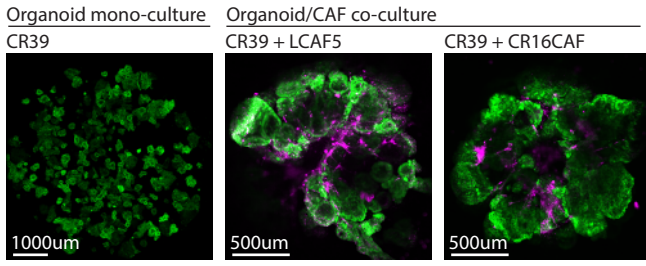

Figure S2. Confocal images of organoid mono-culture and Organoid/CAF co-cultures after 8 days. Organoids are in green, CAFs are in magenta

## Supplemental figure 3.

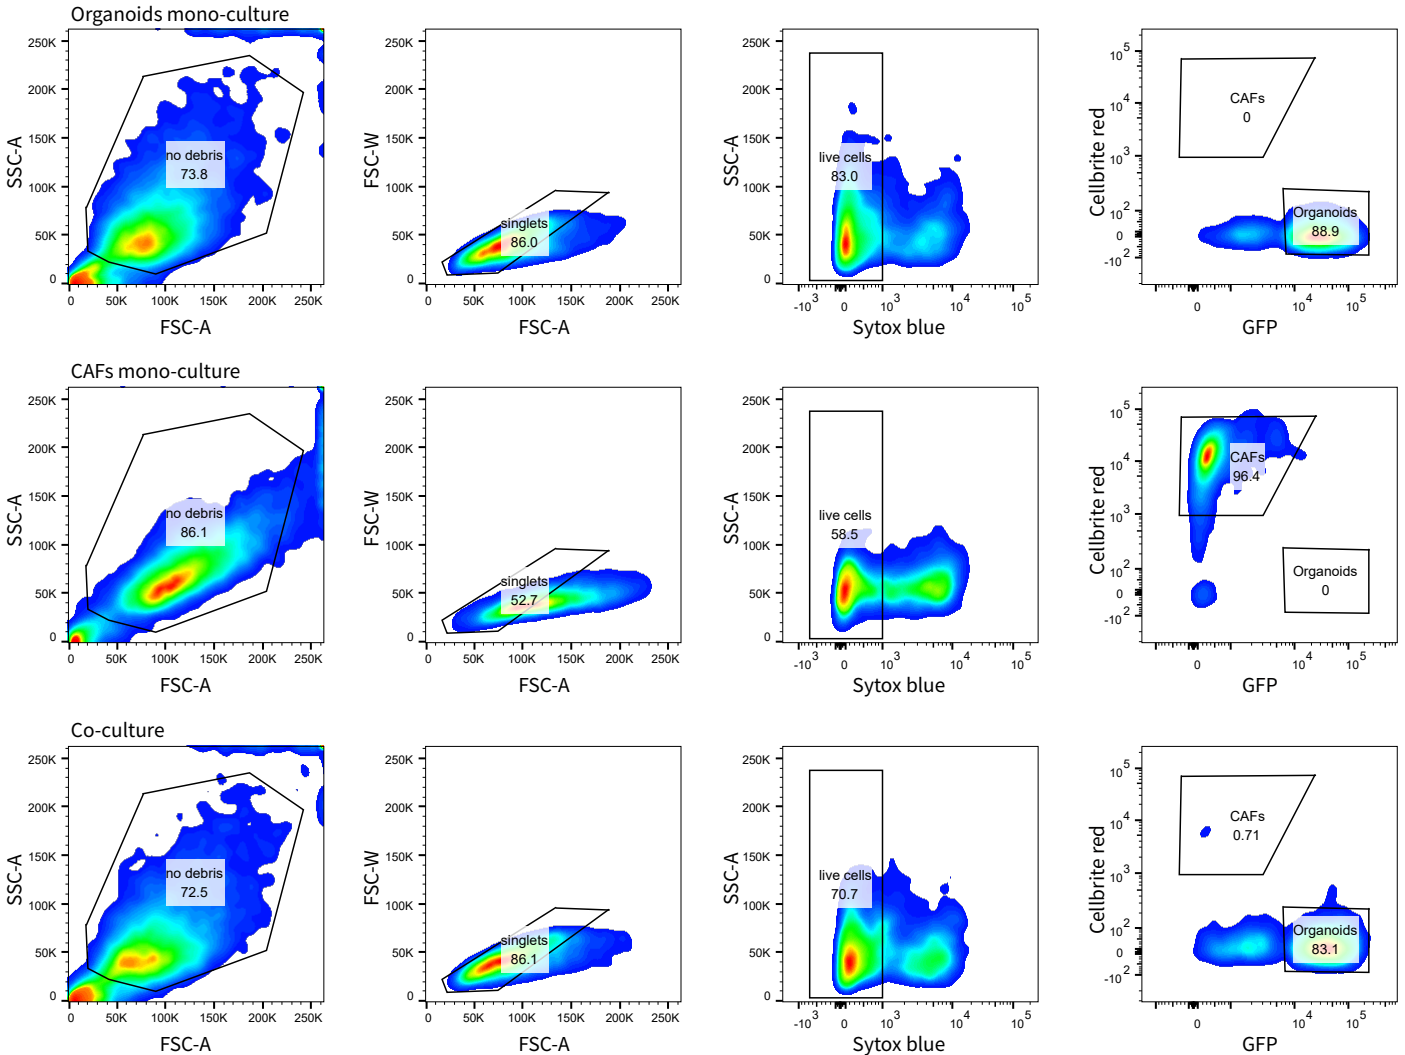

Figure S3. Gating strategy of the FACS sorting of organoids and CAFs from the mono- and co-culture conditions. In the first gate debris is gated out, in the second gate doublets are excluded and in the third gate live cells are selected. GFP positive organoids and Cellbrite red positive CAFs were sorted for single cell RNA sequencing.

# Supplemental figure 4.

Gene Ontology; Organoid cluster 1 vs cluster 2 and 3

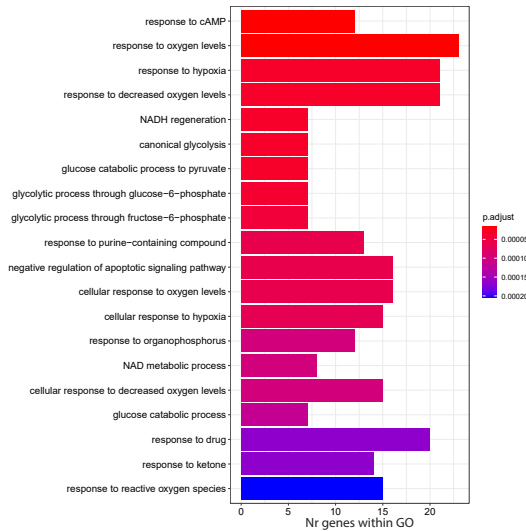

Gene Ontology; Organoid cluster 2 vs cluster 1 and 3

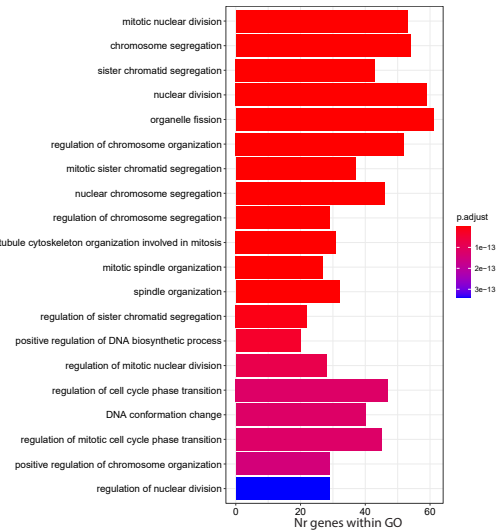

Gene Ontology; Organoid cluster 3 vs cluster 1 and 2

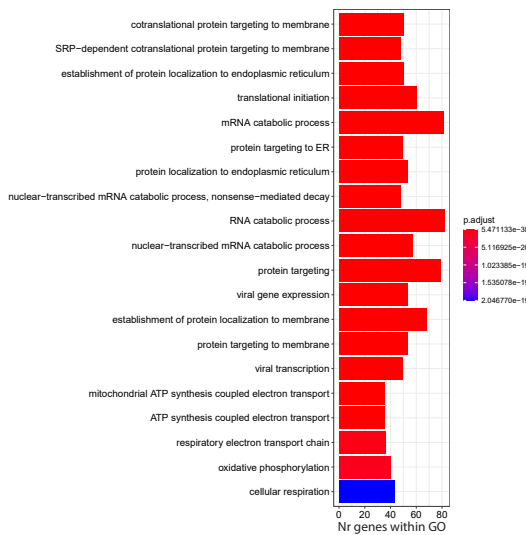

Gene Ontology; CAF cluster 4 vs cluster 5 and 6

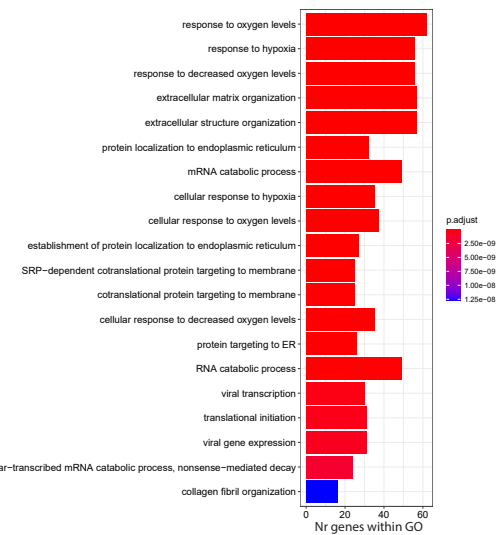

Gene Ontology; CAF cluster 5 vs cluster 4 and 6

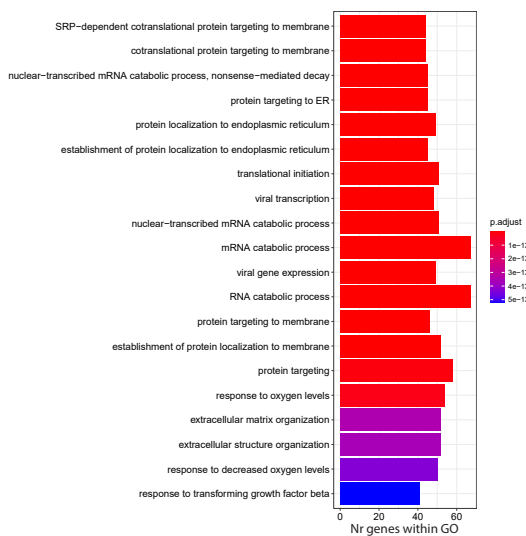

Gene Ontology; CAF cluster 6 vs cluster 4 and 5

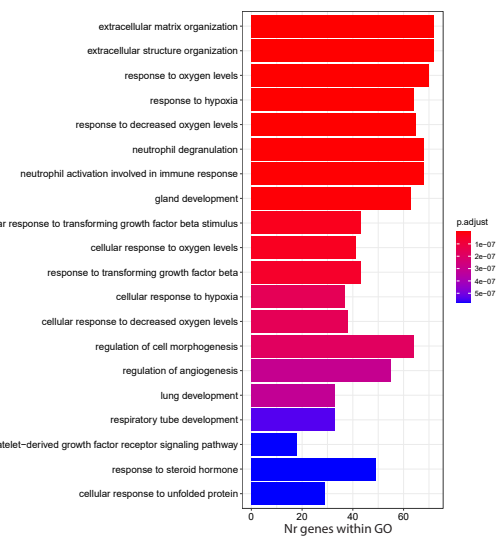

Figure S4. Gene Ontology analysis of differential gene expression analysis of the organoid and CAF clusters. The top 20 Gene Ontology categories per cluster are plotted. On the x-axis the number of expressed genes within a Gene Ontology category are shown, the color of the bar represents the adjusted p-value.

## Supplemental figure 5.

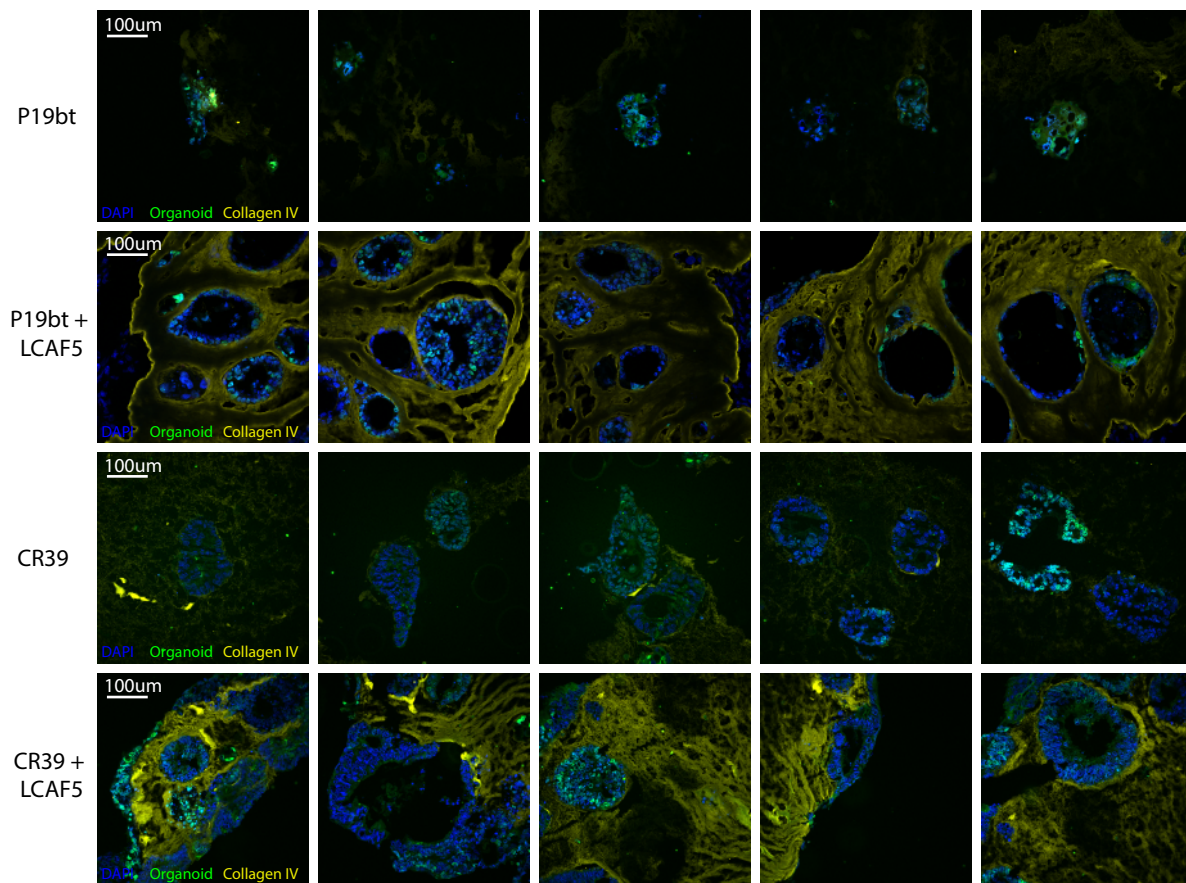

Figure S5. Immunofluorescence images of Collagen IV staining of the P19bt and CR39 mono-cultures and the P19bt/LCAF5 and CR39/LCAF5 co-cultures.

# Supplemental figure 6.

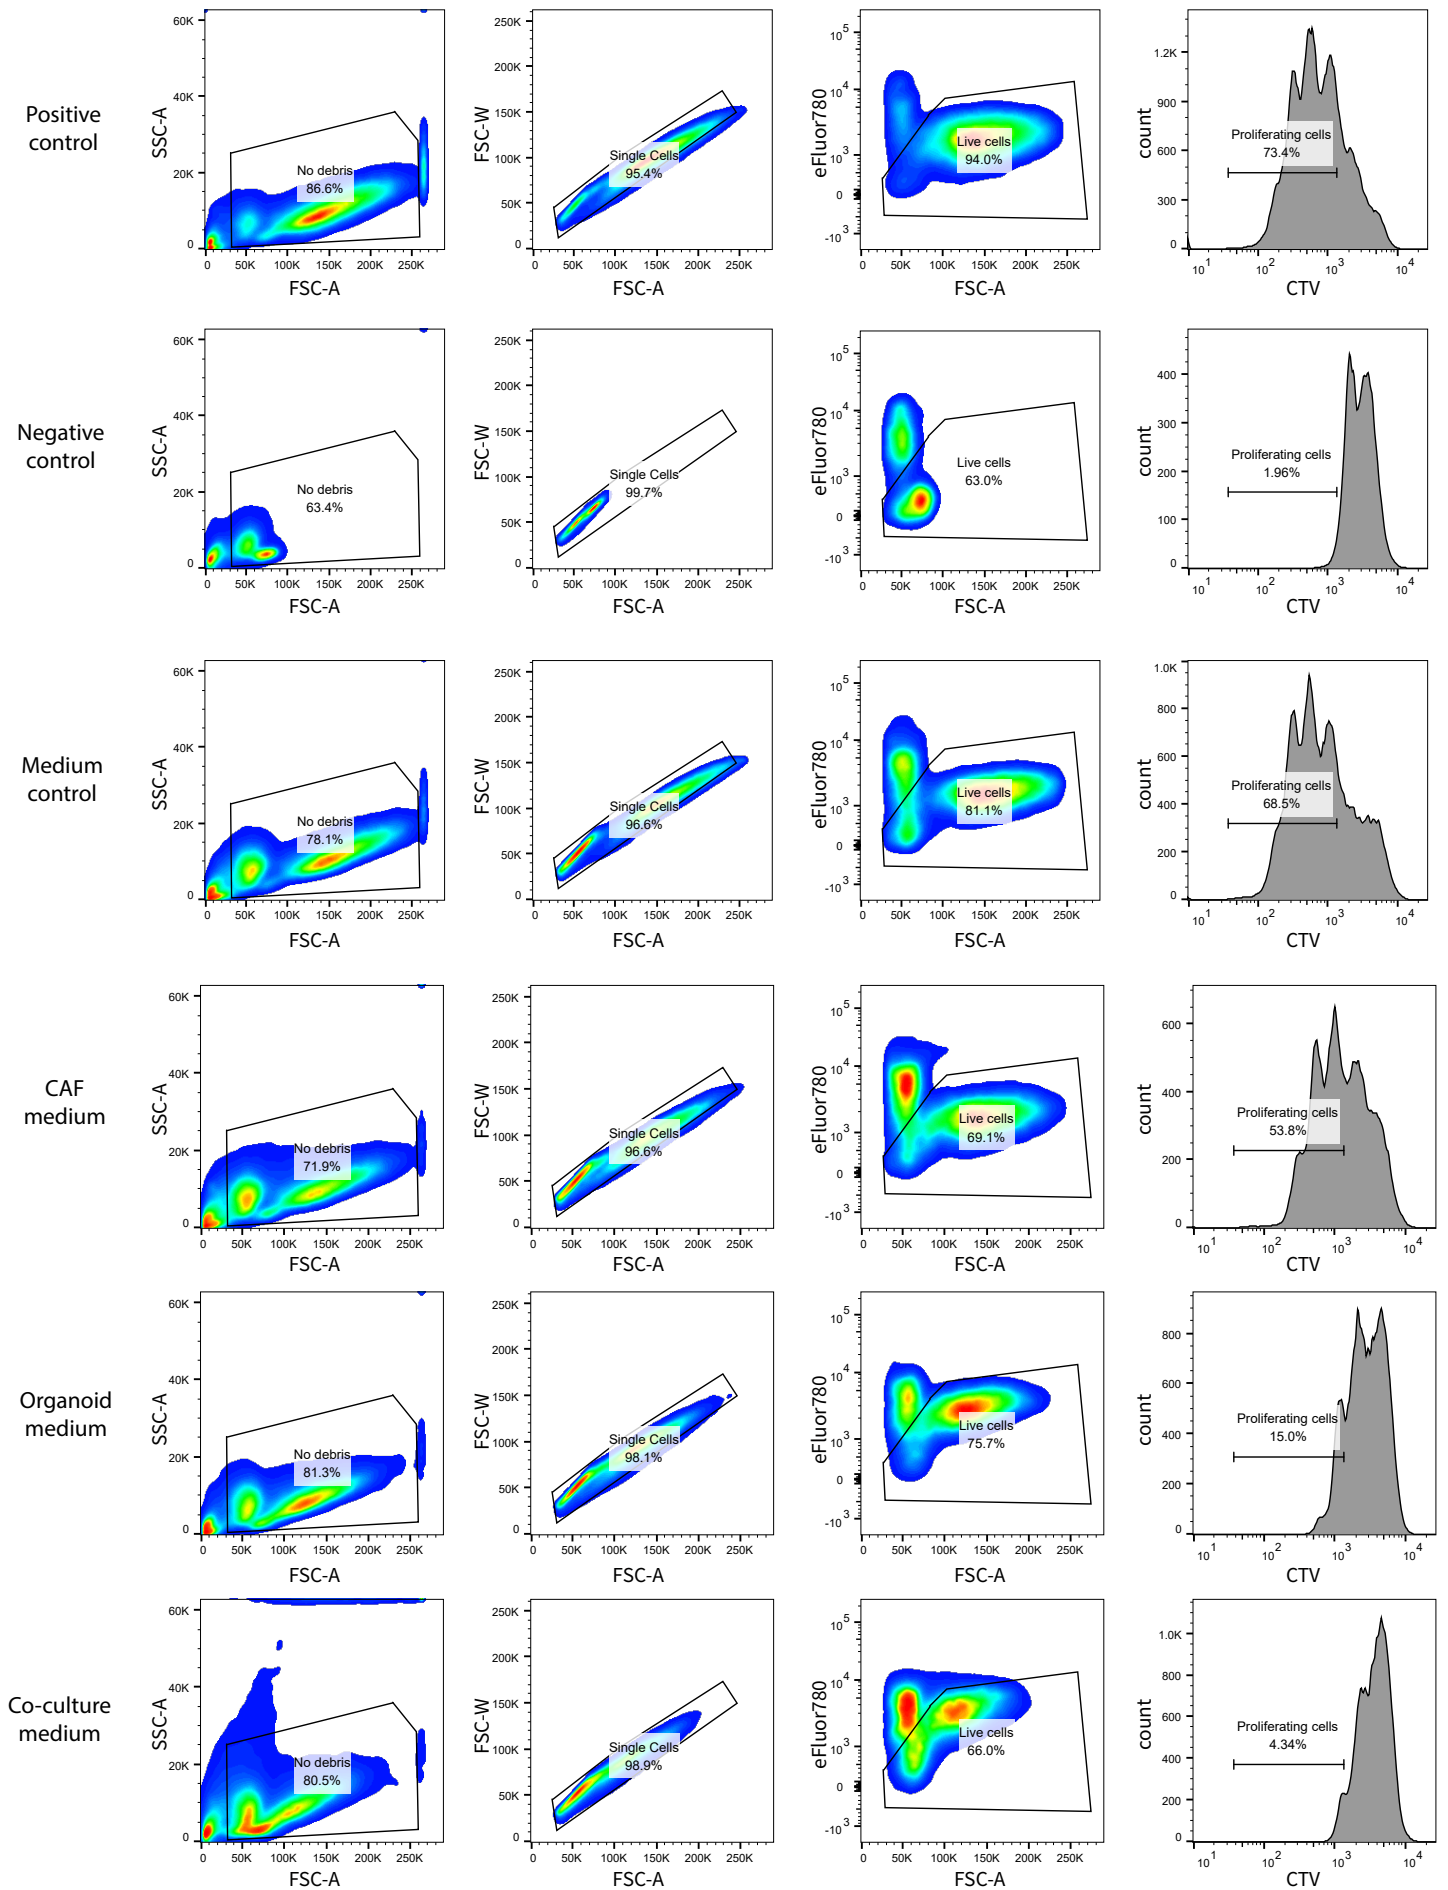

Figure S6. Gating strategy of T cells labeled with Cell Trace Violet (CTV). In the first gate debris is gated out, in the second gate doublets are excluded and in the third gate live cells are selected. The histogram shows the percentage of proliferating T cells.

## Supplemental figure 7.

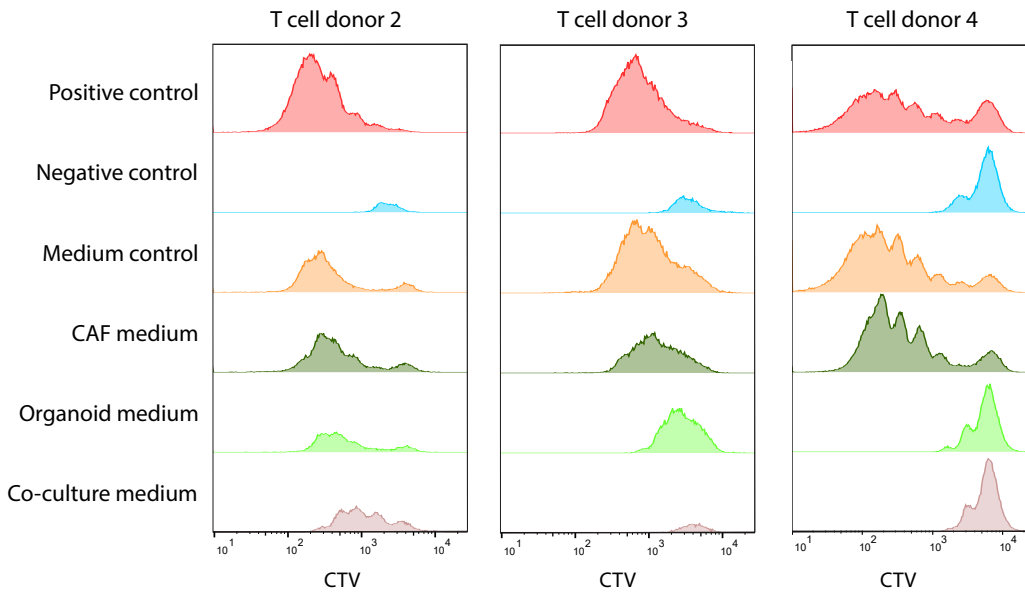

Figure S7. Histogram showing the Cell Trace Violet (CTV) expression of three T cell proliferation experiments with T cells from different donors. The number of peaks show the number of cell divisions. With each cell division CTV is divided over the two daughter cells, generating two cells with half the fluorescence. Peaks with low CTV fluorescence represent T cells that underwent multiple divisions.

### Table S4.

| Condition         | Number of live T cells per sample | Live cells: % of total events measured |
|-------------------|-----------------------------------|----------------------------------------|
| Positive control  | 103.406                           | 78                                     |
| Negative control  | 17.705                            | 39                                     |
| Medium control    | 66.360                            | 59                                     |
| CAF medium        | 44.432                            | 48                                     |
| Organoid medium   | 51.361                            | 61                                     |
| Co-culture medium | 42.518                            | 51                                     |

Table S4. Number of live T cells measured from the T cell proliferation assay with T cell donor 1.
