# Supplementary material for: Co-cultures of colon cancer cells and cancer-associated fibroblasts recapitulate the aggressive features of mesenchymal-like colon cancer
Source: Front Immunol. 2023 May 16;14:1053920. doi: 10.3389/fimmu.2023.1053920 (PMC10228738; doi:10.3389/fimmu.2023.1053920)
Supplement: Supplementary file 4 [file Table_2.xlsx]

## Sheet: DEG Cluster1 organoid
GENES	p_val	avg_log2FC	pct.1	pct.2	p_val_adj
NDRG1	1.46535e-14	1.31302	0.962	0.705	3.16558e-10
SLC2A1	2.9567e-16	1.27926	0.962	0.742	6.38736e-12
KRT19	9.18914e-21	1.17251	0.987	0.72	1.98513e-16
ASS1	8.36963e-13	1.16651	0.983	0.848	1.80809e-08
PSCA	1.12425e-12	1.15305	0.861	0.576	2.42872e-08
TSC22D1	1.7681e-22	1.08439	0.958	0.47	3.81964e-18
IGFBP3	7.98286e-10	1.07658	0.693	0.371	1.72454e-05
SCD	2.5823e-12	1.06438	1	0.947	5.57854e-08
SLC5A3	1.42992e-12	1.03937	0.962	0.674	3.08905e-08
TFF3	4.35041e-17	0.990064	0.992	0.795	9.39818e-13
FTH1	9.29165e-15	0.984097	1	0.97	2.00727e-10
ADIRF	1.01375e-13	0.923819	0.987	0.712	2.19001e-09
TAGLN2	4.38511e-15	0.896376	0.983	0.667	9.47316e-11
UCA1	3.21189e-12	0.867231	0.992	0.788	6.93864e-08
SLC6A8	1.59333e-10	0.862247	0.924	0.674	3.44207e-06
CALB1	1.91181e-16	0.849543	0.996	0.833	4.13007e-12
S100A14	1.09347e-13	0.846444	0.996	0.705	2.36222e-09
LDHA	4.07687e-14	0.836191	0.996	0.848	8.80726e-10
TOB1	1.0673e-15	0.835803	0.971	0.598	2.30568e-11
TMBIM1	6.50867e-15	0.834723	0.803	0.417	1.40607e-10
TSPAN1	1.28379e-15	0.831549	0.87	0.515	2.77338e-11
ALDOA	2.53921e-16	0.827696	1	0.871	5.48545e-12
HHLA2	4.39803e-15	0.827482	1	0.924	9.50107e-11
CD9	2.67942e-14	0.814715	0.992	0.682	5.78836e-10
ALPP	2.72086e-08	0.811161	0.458	0.182	0.000587786
PERP	7.93384e-15	0.805131	0.958	0.576	1.71395e-10
TPPP3	6.13925e-13	0.803129	0.735	0.386	1.32626e-08
BNIP3L	2.13441e-13	0.802308	0.987	0.735	4.61097e-09
PTTG1IP	5.32466e-16	0.794663	0.958	0.659	1.15029e-11
MRPS6	2.46487e-08	0.779011	0.912	0.644	0.000532486
AHNAK	7.50476e-18	0.778366	0.912	0.508	1.62125e-13
ITGB4	2.32555e-13	0.775504	0.887	0.545	5.02388e-09
CA9	1.15061e-11	0.77407	0.672	0.303	2.48567e-07
SPINT2	1.02963e-20	0.77299	0.992	0.886	2.22431e-16
ANXA2	6.88798e-12	0.764294	0.962	0.644	1.48801e-07
CLDN4	7.74785e-15	0.761058	0.996	0.758	1.67377e-10
CYSTM1	2.37887e-16	0.752469	0.95	0.576	5.13907e-12
PDLIM1	1.34128e-17	0.752325	0.945	0.523	2.89756e-13
KLK7	4.85734e-06	0.751242	0.395	0.174	0.104933
TSPAN8	1.54096e-14	0.7491	0.891	0.5	3.32894e-10
P4HA1	6.71935e-17	0.734456	0.916	0.485	1.45158e-12
EEF1A1	6.96489e-15	0.73355	1	0.992	1.50463e-10
FGFBP1	2.76733e-08	0.728528	0.853	0.515	0.000597826
TMSB4X	2.18924e-13	0.726751	1	0.924	4.72941e-09
FXYD3	9.53096e-15	0.722488	0.983	0.727	2.05897e-10
FHL2	2.24662e-14	0.718139	0.92	0.545	4.85338e-10
AQP3	2.76142e-05	0.717414	0.866	0.644	0.596551
HIST1H1C	1.056e-11	0.712895	0.849	0.485	2.28127e-07
ATP1A1	4.71359e-12	0.712305	0.95	0.523	1.01828e-07
RAB25	2.37482e-17	0.711291	0.92	0.545	5.13032e-13
TPI1	8.91005e-13	0.708521	0.996	0.758	1.92484e-08
ERBB3	2.49045e-17	0.707737	0.916	0.545	5.38011e-13
EIF4A2	9.39439e-13	0.694541	0.979	0.697	2.02947e-08
LGALS4	2.88261e-13	0.69254	0.933	0.568	6.22729e-09
GPI	4.289e-09	0.691607	1	0.886	9.26553e-05
CCNG2	7.35872e-19	0.690571	0.748	0.265	1.58971e-14
TSPO	5.4322e-16	0.68554	0.962	0.591	1.17352e-11
KLK10	1.54842e-09	0.683364	0.811	0.485	3.34505e-05
MUC1	3.01046e-13	0.68315	0.912	0.553	6.50349e-09
TXNIP	6.25715e-08	0.682052	0.908	0.614	0.00135173
MYL12B	2.69479e-12	0.673195	0.983	0.629	5.82155e-08
TMEM54	7.88774e-14	0.668709	0.882	0.485	1.70399e-09
QSOX1	2.16843e-16	0.66394	0.761	0.348	4.68446e-12
LAMA3	1.84268e-11	0.662079	0.84	0.485	3.98074e-07
PGK1	1.56419e-10	0.656963	0.987	0.735	3.37911e-06
RNF149	7.18222e-14	0.654424	0.836	0.492	1.55157e-09
GAPDH	7.78334e-12	0.654266	1	0.992	1.68143e-07
TFF2	7.99036e-10	0.651319	1	0.826	1.72616e-05
ERO1A	1.46954e-07	0.645573	0.924	0.659	0.00317466
S100A10	5.46366e-14	0.643322	0.937	0.508	1.18031e-09
S100A4	2.99616e-12	0.642891	1	0.856	6.47261e-08
LOC100505817	6.64769e-12	0.642528	0.861	0.515	1.4361e-07
RHOU	1.49701e-12	0.6421	0.748	0.379	3.234e-08
ALDOC	7.3622e-10	0.641646	0.735	0.402	1.59046e-05
HSPA5	3.87848e-09	0.639679	0.966	0.674	8.37868e-05
RPL18	7.48386e-15	0.639316	1	0.773	1.61674e-10
CLDN3	2.79671e-12	0.638502	0.979	0.667	6.04173e-08
EZR	1.49997e-09	0.636561	1	0.78	3.24038e-05
RNASE4	2.06761e-18	0.629468	0.748	0.303	4.46667e-14
SDC1	2.96031e-09	0.628919	0.954	0.606	6.39515e-05
TMBIM6	1.00284e-15	0.62149	1	0.78	2.16643e-11
S100A16	2.88021e-09	0.619018	0.95	0.598	6.22212e-05
SECTM1	5.88394e-17	0.615863	0.845	0.417	1.27111e-12
LGALS3	2.88317e-12	0.612063	0.966	0.727	6.22851e-08
LAPTM4A	2.67926e-13	0.611395	0.937	0.553	5.78801e-09
ABHD2	1.20892e-10	0.611108	0.874	0.523	2.61164e-06
PRR15	1.72033e-15	0.610438	0.71	0.311	3.71644e-11
CLIC1	1.49217e-11	0.607314	0.983	0.606	3.22354e-07
DHRS3	7.37609e-14	0.606036	0.769	0.394	1.59346e-09
CD70	6.86603e-09	0.605624	0.971	0.697	0.000148327
MPV17L	2.4496e-09	0.603273	0.971	0.742	5.29187e-05
PSAP	7.673e-15	0.602719	0.971	0.576	1.6576e-10
TPT1	8.17237e-15	0.600433	1	0.932	1.76548e-10
OAS1	3.02098e-09	0.599686	0.66	0.326	6.52621e-05
TM9SF3	5.95926e-16	0.599396	0.941	0.53	1.28738e-11
SLC22A18	4.92399e-14	0.589489	0.71	0.326	1.06373e-09
ARF1	1.07555e-12	0.587326	0.958	0.621	2.3235e-08
APP	5.02489e-15	0.581673	0.929	0.523	1.08553e-10
RBPJ	6.76069e-10	0.57699	0.908	0.561	1.46051e-05
ALDH18A1	2.66599e-13	0.576386	0.891	0.515	5.75935e-09
SARAF	4.61032e-14	0.57591	0.924	0.545	9.95967e-10
DSG2	3.4157e-13	0.573918	0.924	0.561	7.37893e-09
KDM1A	1.54053e-09	0.573568	0.899	0.538	3.328e-05
ATP1B1	7.51985e-10	0.571893	0.945	0.614	1.62451e-05
PNMA1	2.03292e-11	0.571146	0.739	0.364	4.39172e-07
C4orf3	2.24847e-15	0.571142	0.95	0.553	4.85737e-11
ARPC3	3.57283e-12	0.570196	0.866	0.477	7.71838e-08
S100A6	7.68554e-11	0.570092	1	0.962	1.66031e-06
BTG1	1.38127e-11	0.569668	0.777	0.417	2.98395e-07
CSTB	3.62411e-11	0.568768	1	0.856	7.82916e-07
LINC01057	7.8248e-10	0.568555	1	0.985	1.69039e-05
TNIP1	5.80738e-17	0.568498	0.773	0.348	1.25457e-12
UBC	4.75752e-10	0.568493	0.987	0.75	1.02777e-05
INSIG1	3.40876e-06	0.5681	0.887	0.561	0.0736395
KRT18	5.93139e-09	0.567717	0.971	0.705	0.000128136
SAT1	4.36466e-13	0.565681	0.903	0.523	9.42899e-09
PFDN5	1.35738e-12	0.565641	0.866	0.485	2.93235e-08
BTBD16	4.06802e-11	0.563629	0.731	0.417	8.78814e-07
KRT8	2.71333e-10	0.560903	1	0.848	5.8616e-06
WDR45B	1.87691e-09	0.559332	0.891	0.629	4.05469e-05
GPRC5C	2.56151e-15	0.558207	0.723	0.341	5.53362e-11
ALCAM	6.75079e-09	0.55733	0.866	0.553	0.000145837
DSP	2.11106e-12	0.556922	0.945	0.606	4.56053e-08
CAV2	2.74527e-08	0.556785	0.924	0.583	0.00059306
DDIT4	8.28767e-11	0.556077	0.845	0.424	1.79039e-06
FBXO7	1.64112e-13	0.555302	0.845	0.432	3.54532e-09
HSPB1	4.63702e-08	0.551541	1	0.894	0.00100174
SYNGR2	1.62747e-14	0.551312	0.777	0.364	3.51581e-10
INSIG2	3.02425e-13	0.550999	0.66	0.28	6.53329e-09
CYP2S1	2.33788e-10	0.550539	0.769	0.447	5.05053e-06
TRIB2	2.1663e-13	0.550035	0.887	0.485	4.67985e-09
ANK1	5.00941e-09	0.547592	0.857	0.515	0.000108218
BCL6	2.28697e-08	0.54708	0.819	0.508	0.000494053
MXI1	1.04218e-10	0.547051	0.908	0.545	2.25142e-06
FTL	4.99404e-08	0.546877	0.992	0.803	0.00107886
HLA-C	6.89608e-11	0.545498	0.958	0.629	1.48976e-06
GPRC5A	3.14603e-10	0.545317	0.769	0.417	6.79638e-06
PRDX1	2.69297e-09	0.544141	0.987	0.644	5.81763e-05
NET1	7.07722e-11	0.543854	0.874	0.523	1.52889e-06
DNAL1	1.08538e-13	0.543037	0.954	0.606	2.34475e-09
MALL	3.4099e-08	0.542443	0.601	0.333	0.00073664
DDR1	1.0912e-15	0.542296	0.664	0.25	2.35731e-11
PPP1CB	1.31287e-13	0.541676	0.937	0.583	2.8362e-09
MMP28	1.09694e-14	0.540216	0.689	0.288	2.36973e-10
TMEM45B	1.50916e-14	0.538543	0.861	0.455	3.26025e-10
RIOK3	3.37092e-11	0.537756	0.748	0.417	7.2822e-07
KCNK1	2.37931e-13	0.536812	0.912	0.5	5.14002e-09
EIF3F	3.38195e-12	0.5355	0.903	0.447	7.30602e-08
MXD1	2.4005e-08	0.53513	0.777	0.492	0.000518579
CCNY	4.35514e-11	0.533423	0.895	0.553	9.40841e-07
TMED10	1.00504e-11	0.532874	0.891	0.47	2.17118e-07
ID1	1.11765e-06	0.532142	0.92	0.682	0.0241445
HPGD	4.7155e-06	0.530354	0.588	0.311	0.101869
FOSB	3.52422e-08	0.529497	0.84	0.508	0.000761336
SLC44A4	6.90758e-13	0.5284	0.945	0.636	1.49224e-08
CAPN5	1.48115e-15	0.528069	0.836	0.417	3.19972e-11
LAMB3	4.17826e-12	0.527074	0.643	0.273	9.02629e-08
KLK1	1.23995e-11	0.525443	0.744	0.386	2.67866e-07
PPARG	4.99393e-14	0.52413	0.819	0.394	1.07884e-09
ENO1	1.12078e-07	0.523749	1	0.818	0.00242121
SERTAD2	4.70823e-10	0.523727	0.702	0.371	1.01712e-05
GCNT3	5.05493e-09	0.521932	0.815	0.492	0.000109202
MYH9	4.39636e-12	0.52107	0.945	0.576	9.49746e-08
DNALI1	3.32485e-11	0.520835	0.916	0.523	7.18268e-07
KDELR1	6.29749e-11	0.520458	0.958	0.614	1.36045e-06
CTNNA1	1.21399e-10	0.519852	0.874	0.53	2.62257e-06
DMBT1	0.0179532	0.518006	0.454	0.326	1
SLCO4A1	5.05061e-11	0.516492	0.92	0.591	1.09108e-06
RHOC	7.06203e-13	0.511767	0.727	0.364	1.52561e-08
HLA-B	5.45397e-11	0.510398	0.966	0.644	1.17822e-06
BHLHE40	9.43193e-06	0.509507	0.744	0.477	0.203758
BTF3	3.53339e-08	0.508523	0.983	0.591	0.000763318
DUSP1	3.66884e-08	0.506764	0.752	0.432	0.000792579
FOS	1.01114e-05	0.505034	0.971	0.727	0.218437
FDFT1	3.95909e-06	0.504652	0.979	0.667	0.0855282
TRIM31	1.54866e-13	0.504459	0.786	0.432	3.34557e-09
JUP	4.42573e-12	0.504407	0.899	0.561	9.56091e-08
IER2	2.67819e-08	0.502727	0.899	0.538	0.00057857
ITGA6	3.30845e-09	0.502464	0.966	0.606	7.14725e-05
TSC22D4	3.62744e-14	0.500736	0.702	0.326	7.83637e-10
HSPA8	0.266885	-0.500089	0.916	0.674	1
CHURC1	0.961375	-0.502201	0.664	0.568	1
AAK1	0.709299	-0.505001	0.475	0.462	1
CDC20	0.00062258	-0.505355	0.273	0.402	1
ESCO2	2.4745e-12	-0.506533	0.076	0.356	5.34567e-08
KREMEN1	0.423609	-0.508638	0.487	0.462	1
FXN	0.0182043	-0.51041	0.256	0.356	1
ZNF621	0.414643	-0.512187	0.45	0.371	1
VIM	0.741841	-0.519878	0.298	0.242	1
BRIP1	1.11054e-05	-0.520957	0.147	0.333	0.239909
RAB3B	0.07412	-0.521138	0.29	0.348	1
NEK2	3.62628e-09	-0.527931	0.109	0.348	7.83386e-05
MCPH1	0.0907571	-0.529665	0.395	0.462	1
ZNF738	1.21582e-05	-0.532069	0.143	0.318	0.262653
METTL8	0.0140754	-0.53868	0.21	0.303	1
MT-RNR1	0.0250315	-0.541995	1	0.992	1
KIF20B	1.47369e-06	-0.542053	0.227	0.424	0.0318361
UBE2C	3.72838e-06	-0.54245	0.16	0.348	0.0805442
UBE2S	0.0100414	-0.551572	0.378	0.439	1
DCUN1D5	0.041521	-0.558982	0.462	0.485	1
TFPI2	0.836291	-0.564276	0.328	0.288	1
KIAA1161	0.419313	-0.564727	0.441	0.447	1
CRYBB2P1	0.0953723	-0.565173	0.248	0.295	1
TACC3	5.32396e-07	-0.566326	0.193	0.394	0.0115014
ASPM	6.81375e-10	-0.566607	0.101	0.348	1.47198e-05
ORAI2	0.238547	-0.567538	0.408	0.417	1
TMPO	0.0225411	-0.567658	0.643	0.523	1
GCLM	0.00212901	-0.575305	0.395	0.5	1
MT-TK	0.148331	-0.588649	0.853	0.727	1
LOC101927136	0.00211857	-0.591797	0.139	0.258	1
PRR11	7.16394e-05	-0.597506	0.277	0.424	1
ERVW-1	0.847246	-0.59787	0.366	0.318	1
MT-RNR2	0.000372294	-0.615151	1	1	1
STMN1	0.069834	-0.615196	0.576	0.485	1
ASF1B	6.65633e-09	-0.616523	0.151	0.386	0.000143797
RAB3IP	0.921332	-0.616793	0.807	0.629	1
MDM4	0.273718	-0.638075	0.71	0.53	1
PLK1	0.000435128	-0.640184	0.269	0.394	1
PLEKHA5	0.310859	-0.641323	0.437	0.455	1
ACADSB	0.738025	-0.656061	0.441	0.409	1
CYP20A1	0.0665534	-0.663662	0.311	0.371	1
TK1	0.000152591	-0.665086	0.277	0.409	1
IGFBP5	0.604809	-0.676265	0.269	0.25	1
FLVCR1	0.247402	-0.676631	0.408	0.424	1
NUSAP1	2.69901e-05	-0.678969	0.231	0.386	0.583067
CCNA2	5.3e-11	-0.68309	0.101	0.356	1.14496e-06
LOC101930085	0.0471021	-0.685283	0.235	0.311	1
HIST1H4C	0.902206	-0.702822	0.613	0.439	1
NUDT9	0.0131527	-0.706411	0.361	0.447	1
LHFPL5	0.0015708	-0.706462	0.147	0.265	1
MCM7	0.00533502	-0.708473	0.571	0.508	1
CDC27	0.0296002	-0.72183	0.479	0.5	1
CKS2	0.143271	-0.723643	0.592	0.5	1
ZNF426	0.100014	-0.729717	0.437	0.455	1
CCNB1	0.0140887	-0.751619	0.298	0.371	1
CENPM	1.21065e-06	-0.754927	0.244	0.455	0.0261538
MT-TM	0.327821	-0.764914	0.576	0.538	1
TUBB	0.0103347	-0.781418	0.857	0.621	1
TUBA1C	0.174598	-0.783091	0.811	0.553	1
CDK1	3.86642e-09	-0.787713	0.088	0.311	8.35262e-05
PCNA	0.0254165	-0.790122	0.391	0.402	1
CEP152	0.0869491	-0.79051	0.294	0.348	1
ENTPD1	0.0177403	-0.797736	0.176	0.258	1
CEBPB-AS1	0.00265034	-0.817253	0.155	0.265	1
LINC00547	0.0116716	-0.826817	0.176	0.258	1
LOC286437	0.0395427	-0.828868	0.21	0.273	1
HSPB6	0.11688	-0.829624	0.378	0.394	1
HMGB2	1.56227e-05	-0.861625	0.361	0.477	0.337498
FAM111B	3.19885e-08	-0.872481	0.113	0.333	0.000691048
CCDC18-AS1	0.90141	-0.877073	0.42	0.379	1
PRNCR1	0.00441612	-0.892508	0.176	0.28	1
APOL6	0.783234	-0.942776	0.597	0.5	1
RNF213	0.0266541	-0.956591	0.782	0.682	1
ZNF829	0.0004843	-0.960756	0.16	0.288	1
RRM2	9.8042e-08	-0.986766	0.235	0.432	0.002118
LOC101928591	0.000170886	-0.991191	0.13	0.265	1
LEPR	0.359879	-0.99182	0.634	0.538	1
ARHGEF26-AS1	0.00140488	-0.993244	0.193	0.303	1
MKI67	4.21669e-07	-0.999681	0.269	0.455	0.00910932
TIGD1	0.0409262	-1.04808	0.424	0.462	1
TPTE2P1	0.0019531	-1.05282	0.21	0.326	1
TSIX	0.237119	-1.07362	0.891	0.803	1
NFX1	0.0341063	-1.07467	0.618	0.583	1
COL1A2	0.276924	-1.08754	0.227	0.25	1
LOC101927374	8.9631e-05	-1.09387	0.139	0.28	1
ASTN2	0.000257569	-1.10355	0.122	0.25	1
NXNL2	6.18825e-05	-1.11676	0.13	0.273	1
SRGAP2B	0.00167444	-1.13459	0.559	0.606	1
ADH4	4.73691e-05	-1.13841	0.193	0.348	1
TUBA1B	0.0269389	-1.19147	0.874	0.606	1
CTSC	3.30589e-05	-1.20106	0.559	0.629	0.714172
SBF2-AS1	0.00603535	-1.21791	0.235	0.326	1
LINC00670	0.00143748	-1.274	0.181	0.288	1
TCTN1	0.013269	-1.27452	0.382	0.447	1
NCAPH	1.59916e-10	-1.28499	0.298	0.583	3.45466e-06
TOP2A	1.84305e-05	-1.29708	0.353	0.47	0.398155
KLHL5	0.0306333	-1.31879	0.437	0.485	1
ZNF37BP	0.000262168	-1.31905	0.542	0.598	1
SAA2	4.56992e-05	-1.31994	0.202	0.356	0.987241
LINC00276	7.90832e-05	-1.33995	0.176	0.326	1
LOC101927973	0.00633083	-1.34104	0.336	0.417	1
COL3A1	0.234974	-1.41204	0.382	0.356	1
XRCC2	1.45023e-05	-1.41951	0.21	0.379	0.313293
CYYR1-AS1	0.0361301	-1.48797	0.235	0.295	1
POTEC	8.99516e-07	-1.49274	0.16	0.356	0.0194322
LINC00550	8.15849e-08	-1.5023	0.134	0.341	0.00176248
C5orf17	0.00143913	-1.51041	0.197	0.303	1
ZNF37A	0.00213159	-1.55577	0.609	0.652	1
NEK11	0.0367726	-1.55627	0.408	0.432	1
LOC643406	0.00233704	-1.56073	0.324	0.424	1
COL1A1	0.242447	-1.74012	0.782	0.682	1
ANKRD20A9P	0.000875012	-1.79391	0.744	0.735	1
HCG18	0.0142719	-1.80804	0.433	0.485	1
ZNF480	0.00386688	-1.85699	0.563	0.576	1
LOC101929415	0.0661193	-1.89916	0.471	0.455	1
DDHD1	1.9986e-05	-1.92391	0.496	0.614	0.431758
ODF2L	0.0772451	-1.94613	0.618	0.583	1
LOC729987	5.84812e-06	-1.95562	0.328	0.5	0.126337
DISC1-IT1	0.00249037	-1.99771	0.374	0.462	1
LOC101926898	0.0190952	-2.01388	0.445	0.492	1
LINC00342	6.90954e-08	-2.08503	0.471	0.644	0.00149267
RAD21-AS1	1.50891e-06	-2.09976	0.231	0.402	0.0325971
ZIM2-AS1	1.36925e-05	-2.13896	0.294	0.455	0.295799
LOC102724434	0.00615155	-2.17661	0.546	0.606	1
SP100	0.0485881	-2.2028	0.66	0.644	1
LOC101928936	0.0098993	-2.23531	0.559	0.568	1
RNA45S5	0.0384482	-2.25429	0.95	0.856	1
LOC101928118	0.0110321	-2.26888	0.492	0.53	1
ZNF471	0.211964	-2.2752	0.651	0.591	1
LOC100129434	0.000572734	-2.30329	0.508	0.591	1
LOC105372751	0.000489122	-2.30421	0.328	0.432	1
CFLAR	5.9668e-07	-2.32321	0.878	0.841	0.0128901
LINC00506	1.45939e-08	-2.35271	0.303	0.53	0.000315272
F5	0.00145999	-2.38152	0.521	0.576	1
LOC55338	0.000646095	-2.41649	0.702	0.742	1
ROR1-AS1	5.89573e-05	-2.67635	0.517	0.591	1
LOC101926889	0.00227607	-2.71275	0.647	0.682	1
TMEM212	0.00111214	-2.71426	0.685	0.705	1
FER	0.00306357	-2.7168	0.739	0.712	1
UGDH-AS1	0.000392658	-2.80971	0.647	0.712	1
LINC00368	0.000437887	-2.84189	0.634	0.667	1
CCDC144B	0.00593567	-2.84871	0.693	0.682	1
LOC729348	0.0144332	-2.9329	0.866	0.811	1
MAB21L3	8.72227e-06	-2.9529	0.836	0.826	0.188427
LOC101929486	0.000247627	-2.9803	0.773	0.773	1
GHET1	0.00313781	-3.01461	0.664	0.659	1
XAF1	0.000117701	-3.03003	0.664	0.705	1
LOC101928103	1.57926e-05	-3.12097	0.849	0.848	0.341167
KCNQ1OT1	3.7713e-07	-3.43272	0.966	0.947	0.00814713
LOC100131257	0.000186681	-3.56392	0.92	0.864	1
LINC00504	4.274e-06	-3.5972	0.92	0.871	0.0923313

## Sheet: DEG Cluster2 organoid
GENES	p_val	avg_log2FC	pct.1	pct.2	p_val_adj
TUBA1B	8.35174e-26	2.23352	1	0.74	1.80423e-21
TOP2A	2.94792e-33	2.0973	1	0.289	6.36839e-29
MKI67	1.12871e-33	1.71279	0.964	0.225	2.43835e-29
PCNA	2.86893e-26	1.6156	0.909	0.305	6.19775e-22
RRM2	2.27238e-32	1.59026	0.909	0.2	4.90903e-28
TUBA1C	5.65706e-21	1.5012	1	0.67	1.2221e-16
HIST1H4C	1.15797e-15	1.49148	0.873	0.495	2.50156e-11
HMGB2	5.02296e-31	1.48504	0.982	0.302	1.08511e-26
TUBB	5.83963e-21	1.47062	1	0.733	1.26153e-16
CKS2	1.0478e-17	1.4149	0.945	0.492	2.26357e-13
CCNB1	3.41228e-17	1.38994	0.764	0.248	7.37154e-13
STMN1	1.57476e-23	1.35285	0.982	0.467	3.40196e-19
NUSAP1	1.80797e-32	1.35179	0.891	0.181	3.90577e-28
HSPA8	4.07244e-21	1.34877	1	0.8	8.79769e-17
CDK1	2.35099e-31	1.3169	0.691	0.076	5.07883e-27
CCNA2	1.58532e-43	1.28705	0.836	0.079	3.42476e-39
HMGB1	2.38617e-23	1.27289	1	0.835	5.15484e-19
LBR	5.88124e-18	1.17109	0.927	0.543	1.27053e-13
MCM7	2.7667e-22	1.16504	0.964	0.476	5.9769e-18
PLK1	3.63437e-23	1.15417	0.836	0.222	7.85133e-19
H2AFZ	1.17644e-20	1.13701	1	0.781	2.54146e-16
HSP90AA1	8.61327e-17	1.11569	1	0.898	1.86072e-12
HSPD1	1.50352e-17	1.10788	0.982	0.79	3.24806e-13
ASF1B	2.65976e-37	1.08324	0.873	0.124	5.74588e-33
UBE2S	1.16435e-23	1.07691	0.945	0.305	2.51535e-19
RAN	1.57802e-19	1.06801	1	0.746	3.40899e-15
FABP5	3.24343e-16	1.06783	0.982	0.575	7.00678e-12
MCM4	4.0357e-25	1.06385	0.891	0.229	8.71832e-21
CDC20	3.83904e-26	1.06039	0.891	0.219	8.29349e-22
HNRNPAB	7.02397e-20	1.04403	1	0.568	1.51739e-15
TMPO	2.65033e-20	1.0165	0.964	0.537	5.72551e-16
DNMT1	1.89004e-23	1.015	0.945	0.397	4.08306e-19
CENPF	7.92489e-26	0.999715	0.782	0.159	1.71201e-21
CKS1B	1.8081e-21	0.9957	0.964	0.47	3.90603e-17
TK1	6.09253e-27	0.981589	0.891	0.225	1.31617e-22
ANLN	1.99103e-31	0.98002	0.927	0.194	4.30122e-27
SMC4	8.05904e-29	0.964195	0.909	0.229	1.74099e-24
CCNB2	3.65832e-25	0.954012	0.8	0.159	7.90307e-21
TFDP1	6.81513e-22	0.950135	0.945	0.403	1.47227e-17
TACC3	4.57053e-34	0.94465	0.891	0.156	9.87372e-30
LDHB	3.95003e-15	0.941024	0.982	0.714	8.53324e-11
PA2G4	8.333e-18	0.928398	0.982	0.648	1.80018e-13
CSE1L	5.05886e-23	0.925914	1	0.441	1.09287e-18
PRC1	2.18418e-32	0.909993	0.818	0.127	4.71848e-28
CYCS	6.69522e-13	0.902789	0.964	0.74	1.44637e-08
GGH	1.7784e-15	0.898826	1	0.587	3.84189e-11
MAD2L1	7.29245e-34	0.896	0.945	0.181	1.57539e-29
C1QBP	9.71257e-17	0.88228	0.945	0.483	2.09821e-12
CACYBP	2.50986e-17	0.869677	0.964	0.53	5.42205e-13
SMC1A	8.83487e-19	0.869494	0.945	0.422	1.9086e-14
ASPM	3.10693e-27	0.869489	0.709	0.098	6.71191e-23
SNRPB	2.71013e-14	0.859227	0.982	0.714	5.8547e-10
RANBP1	4.06205e-17	0.857361	0.964	0.568	8.77525e-13
CCT5	4.52602e-15	0.852572	1	0.629	9.77756e-11
UBE2C	8.70475e-23	0.852535	0.727	0.14	1.88049e-18
KIAA0101	5.76355e-22	0.849116	0.909	0.283	1.2451e-17
YBX1	3.82436e-13	0.848407	0.982	0.905	8.26176e-09
PAICS	1.5391e-15	0.845501	1	0.717	3.32492e-11
TPX2	3.57498e-26	0.84546	0.782	0.152	7.72302e-22
BUB1B	7.44613e-32	0.84084	0.8	0.111	1.60859e-27
KIF11	1.09959e-34	0.8389	0.8	0.102	2.37545e-30
MCM3	1.94385e-20	0.837155	0.818	0.238	4.19929e-16
DUT	1.19625e-15	0.835664	0.909	0.467	2.58425e-11
TCP1	8.08347e-14	0.824517	0.964	0.657	1.74627e-09
MCM6	1.87853e-17	0.820745	0.709	0.197	4.05819e-13
ALDH1A1	9.72098e-06	0.817685	0.836	0.537	0.210002
NCAPD2	7.85707e-21	0.817035	0.945	0.337	1.69736e-16
DLGAP5	4.93805e-31	0.815426	0.673	0.063	1.06677e-26
HNRNPA2B1	1.05047e-13	0.813396	1	0.832	2.26932e-09
FANCI	2.06192e-31	0.810871	0.891	0.181	4.45436e-27
PTTG1	3.17874e-15	0.808528	0.764	0.257	6.86703e-11
DHFR	1.37793e-25	0.808325	0.927	0.263	2.97674e-21
KIF20B	2.40406e-29	0.804214	0.909	0.19	5.19349e-25
PRKDC	4.73059e-16	0.802641	0.964	0.527	1.02195e-11
DEK	1.75389e-15	0.80228	0.982	0.657	3.78893e-11
TMEM106C	6.26456e-18	0.800184	0.909	0.4	1.35333e-13
NCL	2.97282e-12	0.788744	0.982	0.657	6.42218e-08
TOMM40	4.48921e-15	0.778345	0.909	0.422	9.69804e-11
NEK2	1.06297e-27	0.7761	0.727	0.102	2.29634e-23
NASP	3.01249e-19	0.773599	0.927	0.4	6.50788e-15
SFPQ	2.02299e-14	0.773301	1	0.644	4.37027e-10
ECT2	1.02675e-14	0.769478	0.764	0.305	2.21808e-10
NOP56	8.80243e-14	0.76687	0.891	0.46	1.90159e-09
CYC1	8.70729e-13	0.766242	1	0.743	1.88104e-08
SLC25A5	6.94635e-14	0.760024	1	0.794	1.50062e-09
SMC3	6.2949e-20	0.757755	0.927	0.419	1.35989e-15
ATAD2	6.44754e-22	0.757176	0.745	0.165	1.39286e-17
COX5A	3.26856e-15	0.755515	0.982	0.721	7.06108e-11
ESCO2	2.47333e-35	0.75307	0.764	0.073	5.34312e-31
PSIP1	4.23795e-17	0.750078	0.945	0.406	9.15524e-13
GLO1	2.85671e-12	0.749215	0.982	0.641	6.17134e-08
MTHFD1	7.39721e-17	0.748152	0.873	0.368	1.59802e-12
SLBP	7.32991e-16	0.747103	0.909	0.4	1.58348e-11
SRSF2	1.27466e-12	0.74476	0.982	0.683	2.75366e-08
MELK	9.98048e-34	0.743295	0.836	0.124	2.15608e-29
MZT1	8.73755e-17	0.74168	0.927	0.381	1.88757e-12
RRM1	3.11164e-16	0.741603	0.782	0.311	6.72208e-12
KIF2C	6.08785e-34	0.741302	0.673	0.054	1.31516e-29
HSPE1	3.40425e-11	0.740907	1	0.752	7.35421e-07
KIF23	1.56284e-39	0.740357	0.782	0.063	3.37621e-35
TRA2B	2.84485e-14	0.738746	0.964	0.644	6.14573e-10
FBL	5.88904e-14	0.738054	1	0.654	1.27221e-09
SNRPD1	3.91341e-16	0.737053	0.964	0.502	8.45415e-12
ZWINT	7.79919e-28	0.735885	0.8	0.149	1.68486e-23
HNRNPD	4.2735e-12	0.735243	0.982	0.787	9.23203e-08
UBE2T	1.68344e-24	0.73403	0.836	0.21	3.63674e-20
RBBP7	1.43258e-16	0.73328	0.964	0.543	3.09481e-12
MGST1	3.01336e-12	0.731849	0.982	0.597	6.50976e-08
FEN1	2.88596e-20	0.730497	0.673	0.152	6.23454e-16
H2AFV	8.33681e-18	0.728999	0.964	0.46	1.801e-13
PPIA	9.94496e-16	0.727827	1	0.962	2.14841e-11
YWHAQ	7.25474e-15	0.725164	0.982	0.737	1.56724e-10
AURKB	9.80261e-30	0.724405	0.673	0.076	2.11766e-25
PTDSS1	3.17506e-13	0.721936	0.855	0.479	6.85908e-09
LSM5	3.17768e-15	0.721404	0.891	0.416	6.86475e-11
CEP55	6.20435e-33	0.719428	0.673	0.054	1.34033e-28
NCAPG2	3.1898e-31	0.719368	0.855	0.146	6.89092e-27
CKAP5	1.13017e-13	0.717908	0.855	0.416	2.4415e-09
RAD21	2.48593e-10	0.717631	0.982	0.733	5.37036e-06
HMMR	1.78648e-29	0.717018	0.6	0.051	3.85934e-25
SERBP1	9.84207e-15	0.716933	1	0.752	2.12618e-10
CCT7	3.91676e-13	0.705031	0.982	0.578	8.46139e-09
PSAT1	1.69119e-11	0.705022	0.927	0.53	3.65349e-07
SNRPF	8.62069e-15	0.703659	0.945	0.533	1.86233e-10
XRCC6	2.13701e-12	0.691148	1	0.66	4.61657e-08
PBK	1.68085e-35	0.689829	0.764	0.073	3.63113e-31
SAPCD2	8.04398e-22	0.688804	0.891	0.273	1.73774e-17
SRSF3	4.28801e-12	0.688229	0.982	0.651	9.2634e-08
MCM2	4.02091e-22	0.688182	0.727	0.149	8.68637e-18
MCM5	1.41985e-14	0.685779	0.636	0.175	3.0673e-10
BUB3	2.87718e-13	0.68474	0.964	0.657	6.21556e-09
SRSF7	2.29399e-13	0.684291	0.964	0.654	4.95571e-09
GSTM4	6.7546e-09	0.681407	0.836	0.416	0.00014592
TRAP1	2.7042e-13	0.67997	0.945	0.533	5.84189e-09
CHCHD10	1.47593e-09	0.678214	0.982	0.752	3.18844e-05
ARHGAP11A	9.97211e-36	0.676544	0.818	0.092	2.15428e-31
TUBB4B	1.00773e-09	0.676274	0.964	0.667	2.17699e-05
HNRNPA3	3.05053e-11	0.670187	0.982	0.717	6.59007e-07
PPIF	2.00604e-16	0.66973	0.964	0.451	4.33365e-12
GINS2	3.63935e-33	0.667603	0.709	0.07	7.86209e-29
TPM3	1.32957e-12	0.660128	1	0.8	2.87227e-08
HNRNPR	1.79461e-11	0.65987	0.964	0.603	3.87689e-07
CDKN3	1.38937e-28	0.655743	0.673	0.076	3.00146e-24
S100A2	7.23697e-07	0.652054	0.836	0.463	0.015634
HMGN2	4.47997e-17	0.652045	0.945	0.378	9.67808e-13
DKC1	5.1652e-14	0.649449	0.909	0.416	1.11584e-09
DTYMK	2.20383e-24	0.64933	0.909	0.251	4.76093e-20
RACGAP1	5.1811e-20	0.648765	0.836	0.241	1.11927e-15
CENPE	1.37774e-23	0.647541	0.709	0.124	2.97633e-19
VRK1	3.92095e-32	0.647307	0.855	0.14	8.47042e-28
HNRNPU	6.79284e-11	0.646319	0.982	0.743	1.46746e-06
HNRNPM	1.35532e-10	0.6439	0.891	0.495	2.9279e-06
MDH1	1.16167e-11	0.641637	0.982	0.641	2.50955e-07
PTGES3	9.5878e-11	0.639651	1	0.813	2.07125e-06
RPL22L1	1.03707e-10	0.635903	1	0.702	2.24039e-06
EEF1B2	9.37607e-10	0.635748	0.982	0.857	2.02551e-05
BMP4	0.000775877	0.635107	0.964	0.756	1
DDX39A	2.86903e-20	0.633799	0.836	0.257	6.19797e-16
DNAJC9	1.23454e-19	0.632806	0.873	0.286	2.66697e-15
TTK	6.26817e-35	0.632587	0.6	0.029	1.35411e-30
MYC	7.14796e-11	0.632242	0.836	0.359	1.54417e-06
RFC3	1.75464e-23	0.629689	0.691	0.127	3.79056e-19
DBI	6.58291e-10	0.62955	1	0.708	1.42211e-05
AURKA	6.05812e-21	0.628898	0.745	0.165	1.30874e-16
ABCE1	7.13211e-13	0.628807	0.909	0.451	1.54075e-08
HMGA1	6.55047e-12	0.628032	1	0.844	1.4151e-07
ATP5G3	2.41773e-09	0.627071	0.982	0.768	5.22303e-05
SYNCRIP	2.45097e-11	0.623884	0.982	0.67	5.29482e-07
SRP9	2.72935e-10	0.62242	1	0.825	5.89622e-06
ATP5A1	5.90365e-10	0.621871	0.982	0.829	1.27537e-05
CCT6A	1.33615e-09	0.619852	0.982	0.651	2.88649e-05
PSMA7	6.26306e-12	0.618803	1	0.692	1.35301e-07
ANP32B	2.7217e-10	0.61785	0.982	0.749	5.8797e-06
CS	3.74168e-12	0.617288	0.945	0.581	8.08315e-08
SSBP1	5.12636e-11	0.617136	0.927	0.543	1.10745e-06
TUBG1	4.35613e-19	0.617021	0.873	0.298	9.41055e-15
SIVA1	3.43691e-17	0.615539	0.891	0.368	7.42475e-13
ATP5G1	1.89795e-11	0.61028	0.945	0.552	4.10015e-07
EIF1AX	2.53141e-11	0.609873	0.982	0.733	5.4686e-07
TROAP	2.25918e-22	0.609486	0.745	0.146	4.8805e-18
LYAR	1.47739e-20	0.609247	0.818	0.206	3.1916e-16
NME1	4.69895e-16	0.609205	0.891	0.33	1.01511e-11
BUB1	7.60983e-24	0.608619	0.564	0.063	1.64395e-19
CHCHD2	7.09278e-10	0.606951	1	0.844	1.53225e-05
GOT1	1.51636e-12	0.605441	0.891	0.46	3.27579e-08
MRPL3	2.64411e-12	0.604954	0.909	0.498	5.71207e-08
KNSTRN	1.55165e-27	0.604525	0.745	0.114	3.35204e-23
PARK7	1.88323e-09	0.604459	0.964	0.629	4.06835e-05
POLD2	2.85594e-12	0.604278	0.855	0.425	6.16969e-08
NUF2	1.19708e-36	0.602498	0.673	0.041	2.58606e-32
HN1	1.98917e-08	0.601908	0.927	0.606	0.000429721
NDUFS6	5.7622e-12	0.599313	0.982	0.571	1.24481e-07
ANP32E	8.96363e-12	0.596519	0.982	0.59	1.93641e-07
SMC2	6.25032e-20	0.596055	0.891	0.273	1.35026e-15
ACTB	1.37303e-08	0.595184	1	0.892	0.000296615
RCC2	2.96366e-12	0.594767	0.982	0.581	6.4024e-08
CCT4	5.84857e-10	0.594411	0.982	0.702	1.26347e-05
CENPU	3.91749e-31	0.594379	0.836	0.13	8.46295e-27
OLFM4	0.00579295	0.592265	0.691	0.533	1
HAT1	2.80414e-15	0.591479	0.818	0.311	6.05777e-11
DHX9	4.95489e-12	0.586908	0.909	0.498	1.0704e-07
NDC1	3.70951e-16	0.586576	0.891	0.356	8.01364e-12
GOT2	6.66388e-13	0.585312	0.927	0.47	1.4396e-08
XPO1	5.47452e-12	0.58032	0.964	0.692	1.18266e-07
WHSC1	7.07513e-16	0.579235	0.8	0.257	1.52844e-11
YWHAB	4.45939e-09	0.579161	1	0.816	9.63362e-05
TUFM	3.86091e-09	0.577228	0.982	0.756	8.34072e-05
ATP1B3	3.56881e-07	0.575964	0.964	0.708	0.0077097
MDH2	2.53327e-08	0.575537	0.964	0.67	0.000547262
RHEB	2.9662e-12	0.573947	0.982	0.571	6.40789e-08
PHB	3.59467e-08	0.573839	0.964	0.702	0.000776556
RANGAP1	7.02011e-19	0.573191	0.855	0.257	1.51655e-14
RAD51AP1	3.01582e-30	0.571172	0.745	0.095	6.51508e-26
MSH2	1.24691e-15	0.570516	0.709	0.235	2.69369e-11
SLIRP	4.08938e-09	0.570478	0.909	0.568	8.83428e-05
ATP5O	2.19987e-09	0.570374	1	0.762	4.75237e-05
NPM1	1.37173e-09	0.57011	0.982	0.886	2.96335e-05
CCT2	1.50051e-09	0.569893	0.982	0.743	3.24156e-05
ANXA1	2.51836e-06	0.567271	1	0.816	0.0544042
TCOF1	9.66382e-20	0.567122	0.855	0.248	2.08767e-15
USP1	2.39715e-15	0.565552	0.782	0.257	5.17856e-11
NAA50	4.18097e-10	0.564365	0.964	0.67	9.03215e-06
SSRP1	1.23001e-12	0.56423	0.945	0.546	2.65719e-08
MINOS1	9.74946e-11	0.564084	0.982	0.568	2.10618e-06
LSM4	3.41554e-10	0.562036	0.964	0.632	7.37858e-06
WDR34	2.11878e-09	0.561143	0.873	0.524	4.57721e-05
SIGMAR1	1.38107e-09	0.559718	0.927	0.565	2.98353e-05
SNRPE	4.77637e-11	0.556833	0.982	0.565	1.03184e-06
XRCC5	1.23787e-10	0.556155	1	0.66	2.67416e-06
PSMA1	2.74878e-10	0.55466	0.982	0.651	5.93819e-06
UBB	1.57219e-08	0.55438	1	0.873	0.00033964
NT5DC2	7.93588e-13	0.554042	0.873	0.403	1.71439e-08
CKLF	1.02181e-15	0.553406	0.909	0.365	2.20742e-11
CHAF1A	5.16327e-22	0.552909	0.691	0.127	1.11542e-17
HNRNPA1	3.3507e-08	0.552792	1	0.848	0.000723852
BRCA1	7.2129e-30	0.552337	0.782	0.108	1.5582e-25
NDUFAB1	1.59763e-10	0.548294	0.982	0.683	3.45137e-06
HSP90AB1	5.81884e-08	0.548026	1	0.911	0.00125704
ILF3	2.2669e-11	0.547978	0.982	0.651	4.89717e-07
UNG	2.88717e-07	0.546256	0.636	0.343	0.00623715
PSMG1	1.97496e-15	0.544668	0.764	0.251	4.26651e-11
PARP1	1.93808e-11	0.544194	0.855	0.419	4.18684e-07
ERH	6.20376e-11	0.544123	0.927	0.651	1.3402e-06
PTMA	2.10092e-08	0.543069	1	0.981	0.000453862
CBX3	2.19987e-09	0.542324	0.982	0.765	4.75237e-05
IPO7	3.17713e-13	0.541407	0.909	0.444	6.86356e-09
ACTG1	1.43269e-08	0.537258	1	0.94	0.000309504
ATP5J2	5.97521e-07	0.53645	1	0.756	0.0129082
GSTP1	9.36397e-09	0.536259	1	0.822	0.00020229
NCAPD3	1.55528e-24	0.534686	0.836	0.184	3.35988e-20
YWHAE	1.07699e-09	0.533342	0.982	0.879	2.32662e-05
PSMA3	5.61438e-09	0.532196	0.927	0.606	0.000121288
MYBL2	1.12833e-25	0.530356	0.673	0.092	2.43752e-21
PSMD1	8.49955e-10	0.529569	0.909	0.498	1.83616e-05
BTG3	6.36753e-11	0.52914	0.909	0.441	1.37558e-06
SKA2	8.16323e-15	0.528066	0.818	0.295	1.7635e-10
NOLC1	3.17359e-09	0.525959	0.927	0.502	6.8559e-05
BIRC5	1.09662e-28	0.524853	0.673	0.076	2.36902e-24
FKBP4	2.62825e-10	0.524627	1	0.705	5.6778e-06
ILF2	8.29908e-11	0.523809	0.964	0.61	1.79285e-06
FOXM1	2.68251e-31	0.521995	0.655	0.057	5.79502e-27
ACTL6A	2.43662e-13	0.519708	0.927	0.435	5.26383e-09
UQCRFS1	7.61533e-08	0.51795	0.982	0.654	0.00164514
CDCA5	5.65305e-44	0.517888	0.709	0.029	1.22123e-39
GMNN	9.1352e-19	0.516949	0.709	0.178	1.97348e-14
MRPS15	8.65305e-10	0.516841	0.909	0.556	1.86932e-05
MRPL37	6.15625e-12	0.516029	0.927	0.489	1.32993e-07
CKAP2	6.19285e-14	0.515493	0.818	0.292	1.33784e-09
GGCT	1.07899e-13	0.513501	0.855	0.337	2.33094e-09
NUCKS1	9.35068e-07	0.511587	0.964	0.686	0.0202003
MTCH2	6.52945e-09	0.508642	0.836	0.533	0.000141056
SLC25A3	2.56867e-09	0.508287	1	0.848	5.54909e-05
ATP5B	4.77629e-08	0.506958	1	0.857	0.00103182
ARL6IP1	6.58264e-06	0.506492	1	0.733	0.142205
MRPL18	1.18352e-12	0.506105	0.891	0.448	2.55677e-08
UBE2N	4.07923e-11	0.505763	0.927	0.498	8.81237e-07
RPL7	1.37557e-08	0.504983	1	0.933	0.000297165
SLC25A39	5.89517e-08	0.50489	0.982	0.717	0.00127353
DHCR24	1.29502e-11	0.504565	0.873	0.397	2.79763e-07
HMGN1	4.21205e-08	0.504392	0.982	0.794	0.000909929
ATPIF1	6.37205e-09	0.503341	1	0.762	0.000137655
MIS18A	7.32805e-16	0.503279	0.782	0.267	1.58308e-11
FKBP1A	3.78637e-08	0.503127	0.982	0.724	0.00081797
ATP5H	4.29706e-08	0.502549	1	0.746	0.000928294
HPRT1	1.30434e-13	0.501381	0.891	0.371	2.81776e-09
NDC80	7.65536e-28	0.501076	0.509	0.029	1.65379e-23
PSMD11	2.80199e-08	0.500354	1	0.711	0.000605313
NOP58	2.69104e-11	0.500316	0.927	0.498	5.81345e-07
HLA-A	0.000113151	-0.500069	1	0.924	1
WSB1	0.0223103	-0.50179	0.873	0.775	1
RBPJ	0.190843	-0.502782	0.945	0.756	1
IER5L	0.0130277	-0.503489	0.764	0.698	1
TMSB4X	0.00151724	-0.50483	1	0.968	1
ADM	0.178184	-0.507762	0.309	0.34	1
WDR45B	0.0147604	-0.509239	0.964	0.768	1
TMC4	0.00878291	-0.509714	0.418	0.495	1
CALML4	0.00240118	-0.509767	0.655	0.695	1
IL32	0.072858	-0.510632	0.291	0.365	1
JUP	0.00541275	-0.51477	0.909	0.756	1
KDM5C	0.0124423	-0.515261	0.745	0.695	1
MSMO1	0.544207	-0.51684	0.945	0.771	1
PYGB	0.0617681	-0.517015	0.727	0.641	1
GADD45B	0.0692274	-0.520798	0.436	0.454	1
TSPAN3	0.0217965	-0.521471	0.927	0.756	1
CRKL	0.173594	-0.523973	0.6	0.54	1
MT-RNR2	0.000174447	-0.52456	1	1	1
CHD2	0.044727	-0.52554	0.818	0.711	1
PLK3	0.248186	-0.525874	0.309	0.321	1
RNF149	0.0679728	-0.526263	0.891	0.683	1
SNCG	0.485982	-0.528549	0.673	0.521	1
MDM4	0.0768053	-0.533508	0.673	0.641	1
CRIP2	0.0220063	-0.536807	0.8	0.727	1
TJP3	0.00828119	-0.541198	0.764	0.663	1
KMT2E	0.0430155	-0.543251	0.8	0.654	1
MAPK15	0.0330447	-0.543599	0.673	0.619	1
ITGB1	0.00570258	-0.545624	1	0.876	1
INSIG2	0.0398442	-0.545635	0.527	0.524	1
FAM129B	0.027864	-0.548	0.836	0.717	1
CDA	0.0772801	-0.548119	0.655	0.571	1
VEGFA	0.091667	-0.54867	0.982	0.832	1
NFKBIA	0.176085	-0.549465	0.855	0.727	1
FOSL2	0.105811	-0.551906	0.4	0.403	1
CLDN4	0.00124441	-0.553898	0.982	0.898	1
TTC3	0.0155208	-0.554313	0.836	0.733	1
CREBRF	0.000453607	-0.554595	0.273	0.483	1
STC2	0.740382	-0.555952	0.6	0.524	1
PRSS8	0.0334247	-0.556913	0.582	0.575	1
ACSS2	0.118617	-0.562869	0.745	0.667	1
MUC1	0.00336738	-0.564231	0.891	0.765	1
DHRS3	0.0339366	-0.565397	0.709	0.622	1
LAMB3	0.0358782	-0.565545	0.491	0.514	1
CDKN1C	0.403041	-0.565704	0.618	0.524	1
HIST1H1C	0.103431	-0.566485	0.836	0.698	1
ALDH18A1	0.00974637	-0.568544	0.855	0.74	1
CCDC28A	0.00504324	-0.570171	0.655	0.61	1
CCNY	0.0299898	-0.571146	0.927	0.746	1
LINC01057	7.99003e-05	-0.572097	1	0.994	1
MYO6	0.00396453	-0.574909	0.909	0.806	1
F3	0.00437999	-0.586596	0.945	0.844	1
SLC38A2	0.234931	-0.587123	0.964	0.838	1
LRP1	0.00728266	-0.591282	0.709	0.641	1
GLRX	0.0920786	-0.591346	0.727	0.657	1
RASSF5	0.0324993	-0.593384	0.382	0.425	1
RNF213	0.396834	-0.593917	0.818	0.733	1
ERBB3	0.000309717	-0.594988	0.909	0.762	1
CYP3A5	0.00128465	-0.597788	0.236	0.406	1
AHNAK	0.0173047	-0.598345	0.927	0.74	1
CA9	0.0310764	-0.598832	0.509	0.546	1
SECTM1	0.00905553	-0.601338	0.745	0.683	1
TFPI2	0.00345768	-0.603233	0.164	0.34	1
AKAP9	0.00729753	-0.603438	0.782	0.695	1
KLK7	0.411261	-0.603776	0.309	0.317	1
LAMA5	0.120744	-0.612436	0.836	0.683	1
TIGD1	0.604235	-0.616891	0.491	0.429	1
IGFBP6	0.133068	-0.619003	0.455	0.448	1
ADH4	0.595922	-0.62048	0.255	0.248	1
MMP2	0.00731002	-0.622134	0.109	0.26	1
MYH14	0.0105769	-0.623184	0.873	0.714	1
TFF2	0.0395907	-0.623792	1	0.927	1
DDIT4	0.11627	-0.626196	0.691	0.695	1
ADIRF	0.0159886	-0.627572	1	0.87	1
NPEPPS	0.0113975	-0.629188	0.873	0.733	1
HK2	0.0993198	-0.629712	0.673	0.587	1
UCA1	0.0123803	-0.6309	1	0.905	1
HHLA2	1.01117e-05	-0.631748	1	0.968	0.218442
RIOK3	0.0665989	-0.634158	0.727	0.613	1
ELF3	0.000231978	-0.635756	1	0.93	1
OLMALINC	0.0134197	-0.63687	0.836	0.708	1
TCTN1	0.57101	-0.638297	0.509	0.387	1
LAMA3	0.0509732	-0.639591	0.8	0.698	1
RBPMS	0.000880619	-0.641133	0.764	0.705	1
PLXNB2	0.0116237	-0.642259	0.818	0.717	1
QSOX1	0.00404903	-0.643319	0.636	0.61	1
COL6A1	0.000280166	-0.652287	0.909	0.835	1
NFX1	0.232799	-0.653429	0.636	0.6	1
APOL6	0.174352	-0.655485	0.582	0.559	1
P4HA1	0.0010048	-0.65685	0.782	0.759	1
TSPAN8	0.0177315	-0.65734	0.855	0.733	1
LGALS3	0.000355258	-0.657358	0.982	0.863	1
CREB3L1	0.0162773	-0.658122	0.418	0.495	1
MT-RNR1	0.000272639	-0.659053	1	0.997	1
TPTE2P1	0.313479	-0.659484	0.236	0.254	1
IFITM2	0.00531686	-0.660495	0.764	0.721	1
TRIB2	0.0131692	-0.660691	0.818	0.73	1
CCDC18-AS1	0.128366	-0.668868	0.418	0.403	1
CYP2S1	0.133015	-0.669867	0.764	0.635	1
GSN	0.00240429	-0.670078	0.564	0.613	1
SPARC	0.00341186	-0.672846	0.091	0.257	1
TMEM59	0.000362043	-0.673305	0.945	0.819	1
DNAL1	0.000154794	-0.67555	0.927	0.813	1
GPI	9.62969e-05	-0.678807	1	0.952	1
MPV17L	0.000218018	-0.679864	0.982	0.873	1
ST3GAL1	0.00594785	-0.683073	0.782	0.737	1
RNF145	0.0733771	-0.687557	0.818	0.711	1
LEPR	0.0839962	-0.689649	0.582	0.603	1
EIF1	0.000415769	-0.690504	1	0.921	1
FXYD3	6.12258e-06	-0.692993	0.982	0.876	0.132266
MT2A	0.98993	-0.695731	0.618	0.438	1
SEMA4B	0.0278252	-0.695872	0.873	0.73	1
TPPP3	0.059963	-0.697634	0.691	0.597	1
PLAC8	0.0453157	-0.706991	0.4	0.444	1
CD55	0.185618	-0.707505	0.709	0.552	1
KRT19	0.00108958	-0.708793	0.964	0.879	1
KCMF1	0.0322575	-0.709965	0.855	0.711	1
EIF4A2	6.78198e-05	-0.715644	1	0.857	1
ALDOA	7.93828e-05	-0.720769	1	0.946	1
PLOD2	0.0109569	-0.722927	0.891	0.752	1
XRCC2	0.48348	-0.723706	0.345	0.257	1
TNFSF9	0.0319515	-0.726554	0.909	0.768	1
DNM2	0.000125387	-0.726934	0.836	0.762	1
RHBDF1	0.0216701	-0.727935	0.764	0.702	1
LGALS1	0.00213122	-0.730705	0.182	0.359	1
ZNF37A	0.209384	-0.732936	0.855	0.584	1
EHD2	0.000190377	-0.741014	0.364	0.527	1
MYRF	0.000647192	-0.750035	0.945	0.797	1
SBF2-AS1	0.25434	-0.754392	0.236	0.273	1
PNRC1	2.33529e-05	-0.754528	0.818	0.794	0.504493
JUND	5.83732e-05	-0.759298	1	0.879	1
TFF3	0.000398454	-0.773996	1	0.908	1
MAFF	0.0195175	-0.774099	0.727	0.651	1
CAMK2N1	4.36377e-05	-0.775873	0.964	0.816	0.942705
SLC25A29	0.000538385	-0.779543	0.473	0.568	1
PTTG1IP	7.15393e-06	-0.78149	0.982	0.829	0.154546
SAA2	0.316352	-0.783106	0.236	0.26	1
ITGB4	0.00145998	-0.783317	0.818	0.756	1
TSC22D1	0.000345069	-0.783665	0.818	0.778	1
HSPB6	0.00173797	-0.78614	0.236	0.41	1
PNPLA2	1.79381e-06	-0.787222	0.927	0.873	0.0387518
TXNIP	0.00714969	-0.789147	0.873	0.79	1
KLHL5	0.569406	-0.807488	0.527	0.441	1
LOC101927973	0.263342	-0.813302	0.364	0.365	1
KDM5B	2.08226e-05	-0.821961	0.618	0.676	0.44983
TMBIM1	0.0114719	-0.82629	0.745	0.651	1
POTEC	0.825359	-0.833093	0.255	0.225	1
BCL6	0.00371293	-0.833723	0.745	0.702	1
YPEL3	9.95047e-06	-0.839622	0.727	0.73	0.21496
PLAT	0.290971	-0.841133	0.236	0.27	1
DMBT1	0.0786137	-0.848303	0.345	0.419	1
BNIP3L	9.33759e-05	-0.864297	1	0.879	1
ENO2	0.00422755	-0.869173	0.836	0.749	1
SLCO4A1	0.000291761	-0.872689	0.855	0.794	1
PSCA	0.0205712	-0.873366	0.873	0.74	1
HILPDA	0.00339248	-0.888427	0.4	0.511	1
SREBF1	0.000267991	-0.89967	0.945	0.803	1
EFNA1	7.83427e-05	-0.912085	0.473	0.616	1
CYYR1-AS1	0.119833	-0.912307	0.2	0.267	1
MUC4	0.00256694	-0.916749	0.382	0.511	1
COL3A1	0.0485704	-0.919557	0.273	0.39	1
MKNK2	1.1102e-06	-0.92098	0.927	0.848	0.0239837
ALDOC	0.00271416	-0.930698	0.582	0.622	1
SH3BGRL3	1.13557e-08	-0.935788	1	0.937	0.000245318
C5orf17	0.0165315	-0.939264	0.127	0.254	1
TSIX	0.00250697	-0.940953	0.964	0.841	1
P4HA2	0.000856847	-0.945575	0.545	0.61	1
SLC44A4	7.60883e-10	-0.947357	0.855	0.832	1.64374e-05
LOC643406	0.259196	-0.951284	0.364	0.359	1
GPRC5A	0.000217058	-0.951534	0.582	0.654	1
FAM63B	0.0002063	-0.954206	0.891	0.825	1
NEK11	0.123467	-0.9762	0.382	0.422	1
S100P	7.2987e-05	-1.00466	0.964	0.879	1
ULK1	0.0012319	-1.02128	0.545	0.597	1
LPCAT4	1.90899e-05	-1.03477	0.782	0.743	0.4124
ASS1	0.000283902	-1.03791	1	0.924	1
TIMP3	0.00370238	-1.04499	0.818	0.724	1
ZNF480	0.676251	-1.04973	0.673	0.549	1
LINC00342	0.354551	-1.05686	0.709	0.502	1
TRIP10	1.08023e-06	-1.07044	0.873	0.863	0.0233362
BHLHE40	0.00130359	-1.07824	0.618	0.654	1
DDHD1	0.595362	-1.08016	0.691	0.511	1
SLC2A1	7.28011e-05	-1.09182	0.982	0.867	1
EZR	6.56395e-06	-1.0957	0.964	0.914	0.141801
HCG18	0.393999	-1.12136	0.491	0.444	1
MXD1	0.00223907	-1.13398	0.727	0.667	1
SLC6A8	8.10616e-05	-1.15188	0.927	0.819	1
LOC729987	0.509196	-1.16921	0.436	0.381	1
ERO1A	0.000118602	-1.16975	0.891	0.819	1
MRPS6	0.00799784	-1.17546	0.964	0.79	1
TIMP1	9.76103e-08	-1.19256	0.964	0.924	0.00210868
ANKRD20A9P	0.0353598	-1.23279	0.8	0.73	1
DISC1-IT1	0.275002	-1.24115	0.418	0.403	1
COL1A1	0.00200024	-1.24673	0.745	0.746	1
FTH1	2.54612e-06	-1.26445	1	0.987	0.0550039
SCD	2.25267e-07	-1.27394	1	0.978	0.00486645
LOC101929415	0.00962922	-1.29425	0.364	0.483	1
SLC5A3	2.506e-05	-1.29534	0.927	0.848	0.541372
IGFBP3	0.00371197	-1.29896	0.545	0.584	1
NEAT1	3.72613e-11	-1.30234	1	0.994	8.04955e-07
RAD21-AS1	0.0184091	-1.32021	0.182	0.311	1
LOC101926898	0.380334	-1.32036	0.509	0.454	1
ODF2L	0.0211124	-1.33899	0.6	0.606	1
CFLAR	0.703201	-1.34642	0.982	0.844	1
ZIM2-AS1	0.235708	-1.36364	0.345	0.352	1
LINC00506	0.88025	-1.38395	0.473	0.368	1
LOC102724434	0.955106	-1.4154	0.727	0.54	1
LOC101928936	0.131857	-1.51955	0.582	0.559	1
LOC100129434	0.358493	-1.52406	0.618	0.524	1
LOC101928118	0.135609	-1.52653	0.527	0.502	1
RNA45S5	0.225389	-1.52717	1	0.902	1
LOC105372751	0.0346957	-1.5581	0.291	0.378	1
SP100	0.00792962	-1.60078	0.691	0.648	1
MALAT1	4.44726e-10	-1.66651	1	0.99	9.60742e-06
F5	0.0117877	-1.70929	0.509	0.546	1
NDRG1	9.28835e-08	-1.71239	0.891	0.867	0.00200656
ROR1-AS1	0.453336	-1.73329	0.582	0.537	1
ZNF471	0.00156439	-1.73913	0.6	0.635	1
LOC55338	0.0780068	-1.74856	0.855	0.692	1
UGDH-AS1	0.210938	-1.94017	0.818	0.644	1
TMEM212	0.0298243	-1.99546	0.764	0.679	1
LOC101926889	0.024481	-1.99773	0.727	0.648	1
FER	0.00343663	-2.01247	0.745	0.727	1
LINC00368	0.0408663	-2.0474	0.673	0.641	1
MAB21L3	0.00799661	-2.17604	0.909	0.819	1
CCDC144B	0.00129418	-2.23203	0.691	0.689	1
LOC729348	0.00399276	-2.25476	0.964	0.825	1
XAF1	0.0604561	-2.25716	0.745	0.667	1
LOC101929486	0.00116873	-2.36511	0.818	0.765	1
GHET1	0.000523553	-2.37475	0.618	0.67	1
LOC101928103	0.00024753	-2.38963	0.909	0.838	1
KCNQ1OT1	2.93456e-05	-2.70889	0.982	0.956	0.633954
LINC00504	0.00077729	-2.78753	0.945	0.895	1
LOC100131257	0.000204893	-2.89712	0.964	0.889	1

## Sheet: DEG Cluster3 organoid
GENES	p_val	avg_log2FC	pct.1	pct.2	p_val_adj
LINC00504	5.71313e-17	4.38205	0.818	0.925	1.23421e-12
LOC100131257	1.81163e-14	4.37253	0.792	0.928	3.91366e-10
KCNQ1OT1	4.59008e-22	4.22483	0.922	0.969	9.91595e-18
LOC101928103	9.83839e-17	3.8929	0.805	0.86	2.12539e-12
GHET1	6.7671e-11	3.7965	0.688	0.655	1.4619e-06
XAF1	6.0161e-10	3.78729	0.675	0.679	1.29966e-05
LOC101929486	7.50271e-13	3.76435	0.74	0.782	1.62081e-08
MAB21L3	3.67607e-14	3.70335	0.766	0.85	7.94141e-10
LOC729348	6.30296e-08	3.70148	0.701	0.884	0.00136163
CCDC144B	1.30657e-09	3.62256	0.675	0.693	2.82259e-05
LINC00368	2.82024e-09	3.57928	0.662	0.642	6.09257e-05
UGDH-AS1	1.29138e-07	3.5278	0.636	0.679	0.00278976
FER	1.37081e-09	3.46175	0.688	0.741	2.96136e-05
TMEM212	8.82787e-09	3.45593	0.662	0.7	0.000190709
LOC101926889	2.50536e-08	3.45508	0.649	0.662	0.000541232
ROR1-AS1	6.74277e-08	3.36364	0.597	0.529	0.00145664
LOC55338	2.53755e-08	3.13761	0.662	0.73	0.000548188
F5	2.47561e-09	3.09747	0.623	0.519	5.34807e-05
ZNF471	2.1877e-05	3.00819	0.584	0.642	0.472608
LOC105372751	2.43529e-09	2.9929	0.532	0.321	5.26095e-05
LINC00506	5.61225e-11	2.9916	0.571	0.334	1.21241e-06
LOC100129434	1.11829e-06	2.98377	0.571	0.529	0.0241584
CFLAR	4.79808e-10	2.95545	0.74	0.898	1.03653e-05
LOC101928118	1.64978e-05	2.95358	0.532	0.498	0.356402
RNA45S5	0.000455407	2.94063	0.753	0.959	1
LOC101928936	1.27255e-05	2.92172	0.558	0.563	0.27491
SP100	3.24742e-06	2.9116	0.61	0.666	0.0701539
LOC102724434	0.00102788	2.84298	0.519	0.58	1
ZIM2-AS1	6.76485e-10	2.79575	0.532	0.304	1.46141e-05
RAD21-AS1	9.74775e-15	2.74899	0.558	0.222	2.10581e-10
LOC101926898	0.000407713	2.67112	0.481	0.457	1
LINC00342	2.81402e-08	2.66091	0.597	0.515	0.000607913
DISC1-IT1	6.00239e-06	2.6353	0.494	0.382	0.12967
ODF2L	4.01927e-05	2.61393	0.571	0.614	0.868283
LOC729987	3.08833e-09	2.57708	0.545	0.348	6.67171e-05
LOC101929415	9.0902e-06	2.55918	0.519	0.451	0.196376
DDHD1	4.94995e-06	2.52259	0.558	0.532	0.106934
ZNF480	0.00234727	2.45243	0.506	0.584	1
ANKRD20A9P	7.85201e-09	2.44561	0.688	0.754	0.000169627
HCG18	0.000273576	2.42812	0.481	0.444	1
COL1A1	4.35278e-05	2.39914	0.636	0.775	0.940331
NEK11	0.000136308	2.15008	0.468	0.403	1
LOC643406	4.62555e-06	2.14675	0.468	0.331	0.0999258
C5orf17	4.58146e-09	2.09526	0.429	0.184	9.89734e-05
ZNF37A	0.0116163	2.0711	0.506	0.655	1
LINC00550	7.26907e-15	2.07105	0.481	0.137	1.57034e-10
CYYR1-AS1	0.000124758	2.06552	0.364	0.229	1
POTEC	2.08501e-09	2.04484	0.429	0.177	4.50424e-05
COL3A1	0.00174486	1.99494	0.416	0.362	1
XRCC2	6.73254e-06	1.938	0.403	0.235	0.145443
LOC101927973	2.63942e-05	1.89233	0.455	0.341	0.570195
LINC00276	1.43374e-08	1.88409	0.416	0.181	0.000309731
KLHL5	0.00228672	1.86877	0.455	0.454	1
SAA2	1.27508e-08	1.86178	0.442	0.208	0.000275455
LINC00670	1.27431e-07	1.80075	0.39	0.174	0.0027529
TCTN1	0.0153013	1.76681	0.403	0.406	1
ZNF37BP	0.0344443	1.75349	0.468	0.587	1
SBF2-AS1	2.23656e-05	1.75199	0.39	0.235	0.483163
TSIX	5.24779e-05	1.66893	0.688	0.904	1
ADH4	1.39309e-07	1.62534	0.416	0.205	0.0030095
NCAPH	0.0131853	1.62054	0.403	0.399	1
NXNL2	2.01984e-08	1.59037	0.364	0.133	0.000436347
ASTN2	1.46642e-08	1.587	0.351	0.119	0.000316791
LOC101927374	1.42203e-09	1.57666	0.39	0.137	3.07201e-05
NFX1	0.000390394	1.5734	0.545	0.621	1
COL1A2	0.105826	1.55476	0.26	0.229	1
TPTE2P1	5.65317e-06	1.55353	0.39	0.215	0.122125
SRGAP2B	0.0456714	1.54676	0.468	0.604	1
TIGD1	0.00414127	1.533	0.442	0.437	1
CTSC	0.0494634	1.50759	0.468	0.614	1
LEPR	0.00945135	1.5025	0.506	0.625	1
POTEM	0.000523595	1.49624	0.325	0.201	1
SPARC	0.000271768	1.46914	0.338	0.205	1
ARHGEF26-AS1	7.01548e-07	1.46136	0.39	0.191	0.0151555
ARRDC3-AS1	0.00031162	1.4546	0.286	0.15	1
LOC101928591	8.95655e-08	1.44041	0.351	0.133	0.00193488
APOL6	0.129621	1.43983	0.442	0.594	1
RNF213	0.000783096	1.43087	0.584	0.788	1
ZNF829	1.72894e-05	1.39786	0.338	0.171	0.373502
CCDC18-AS1	0.235766	1.37696	0.351	0.42	1
HSPB6	4.32063e-06	1.36973	0.506	0.352	0.0933385
PRNCR1	1.07685e-05	1.35064	0.351	0.177	0.232633
L3MBTL4-AS1	2.4311e-09	1.29703	0.325	0.089	5.2519e-05
LOC286437	0.000227698	1.26876	0.338	0.205	1
SMC2-AS1	6.68512e-06	1.26233	0.299	0.123	0.144419
LINC00547	4.02197e-06	1.25681	0.351	0.167	0.0868866
CEBPB-AS1	0.00010811	1.22654	0.312	0.164	1
LOC101928137	8.82773e-05	1.2157	0.273	0.123	1
ENTPD1	0.00108747	1.20448	0.299	0.181	1
LOC100506688	3.22034e-06	1.19319	0.286	0.106	0.069569
MT-TM	0.482404	1.18733	0.416	0.601	1
LOC100506023	5.0849e-09	1.16354	0.299	0.075	0.000109849
CEP152	0.572182	1.16259	0.273	0.324	1
ALPK1	0.00635834	1.15997	0.273	0.181	1
FAM111B	0.00119966	1.13783	0.286	0.167	1
MMP2	0.00479408	1.13778	0.312	0.218	1
TIMP1	5.2756e-07	1.11067	0.779	0.969	0.0113969
ASB4	3.97141e-07	1.1041	0.273	0.082	0.00857944
IGFBP5	0.0186282	1.09436	0.312	0.249	1
LOC101927575	3.70078e-09	1.08557	0.312	0.082	7.99479e-05
ZNF426	0.125312	1.0843	0.39	0.457	1
MDM4	0.796065	1.07043	0.429	0.703	1
FLVCR1	0.314202	1.05975	0.351	0.43	1
FLJ31662	4.83586e-06	1.04813	0.26	0.089	0.104469
LHFPL5	0.0028944	1.04596	0.273	0.167	1
MT-RNR2	6.91457e-14	1.04173	1	1	1.49375e-09
LOC101930085	0.143095	1.0303	0.273	0.259	1
SHISA9	8.41087e-08	1.0279	0.26	0.065	0.001817
ACADSB	0.648118	1.02756	0.338	0.454	1
NUDT9	0.296894	1.02253	0.338	0.406	1
TFPI2	0.00500458	1.01893	0.377	0.297	1
MT-RNR1	5.38771e-09	1.01703	0.987	1	0.000116391
CYP20A1	0.120459	1.00893	0.325	0.334	1
MALAT1	0.310505	1.00212	0.974	0.997	1
RAB3IP	0.837341	0.984567	0.481	0.812	1
ERVW-1	0.712298	0.96344	0.286	0.365	1
PLEKHA5	0.748571	0.960659	0.312	0.478	1
GJC1	0.00142984	0.950003	0.273	0.157	1
C2orf91	0.00145575	0.934321	0.26	0.143	1
VIM	0.0471119	0.923883	0.312	0.27	1
CDC27	0.915906	0.920625	0.351	0.522	1
RNF145	0.21454	0.886037	0.429	0.805	1
KIAA1161	0.761576	0.880873	0.312	0.478	1
CRYBB2P1	0.0842397	0.877393	0.286	0.259	1
MT-TK	0.34616	0.857806	0.571	0.87	1
ORAI2	0.881011	0.844659	0.312	0.437	1
ZNF621	0.0996442	0.841552	0.247	0.468	1
CRTAP	0.791247	0.83422	0.481	0.802	1
MT-TV	0.398669	0.819801	0.221	0.345	1
AAK1	0.733861	0.810612	0.325	0.509	1
PLAT	0.0655483	0.805342	0.299	0.256	1
SLC25A29	0.000430372	0.791278	0.247	0.635	1
DANT2	0.746171	0.790169	0.247	0.352	1
MCPH1	0.760748	0.77558	0.299	0.451	1
CENPM	0.243569	0.764239	0.208	0.348	1
EHD2	0.249592	0.763819	0.312	0.553	1
LRRC74B	0.258247	0.761758	0.195	0.324	1
DCN	0.800239	0.757226	0.221	0.259	1
DCUN1D5	0.967394	0.756958	0.338	0.505	1
SREBF1	0.0168838	0.747367	0.468	0.918	1
MT2A	0.423195	0.746938	0.39	0.485	1
NUTM2B-AS1	0.531178	0.734761	0.299	0.478	1
LAMA5	0.0250685	0.711688	0.377	0.792	1
CHURC1	0.0915344	0.7113	0.351	0.703	1
MCFD2	0.0341785	0.710141	0.299	0.631	1
RAB3B	0.485275	0.708533	0.221	0.334	1
LOC220729	0.95308	0.706677	0.273	0.375	1
LGALS1	0.0483502	0.706415	0.364	0.324	1
GNB5	0.177018	0.700134	0.208	0.365	1
ULK1	0.00566554	0.696124	0.299	0.666	1
NXPE3	0.503386	0.69186	0.195	0.29	1
METTL8	0.371348	0.691371	0.169	0.263	1
FXN	0.300104	0.691087	0.195	0.317	1
SFRP1	0.0223734	0.689682	0.286	0.208	1
PCOLCE	0.900644	0.689058	0.234	0.311	1
LYST	0.303835	0.688233	0.247	0.41	1
GCLM	0.874233	0.686639	0.312	0.464	1
PTPN14	0.0178086	0.683999	0.247	0.529	1
LPP	0.263076	0.673263	0.442	0.857	1
LRRC58	0.0913748	0.669111	0.325	0.642	1
PDP2	0.875615	0.662001	0.195	0.253	1
SERPINE2	0.863788	0.660272	0.221	0.266	1
CCDC114	0.0100103	0.65665	0.234	0.529	1
SCD5	0.0118423	0.650884	0.26	0.587	1
SOD2	0.000361124	0.649622	0.273	0.696	1
TYW3	0.0208631	0.644403	0.26	0.563	1
FKBP14	0.610388	0.643364	0.182	0.256	1
GNL3L	0.18305	0.642598	0.208	0.365	1
LOC101928464	0.675118	0.641254	0.221	0.314	1
ANO9	0.00413297	0.637816	0.234	0.546	1
KREMEN1	0.0783211	0.636947	0.273	0.532	1
PXMP4	0.544434	0.63335	0.195	0.283	1
POLH	0.457565	0.628161	0.182	0.273	1
GBP4	0.276752	0.627835	0.312	0.3	1
FBLIM1	0.212312	0.627011	0.221	0.379	1
IER3	0.671358	0.625481	0.39	0.618	1
RHBDF1	0.00986368	0.618586	0.377	0.799	1
TFDP2	0.156003	0.615915	0.299	0.549	1
CRHR1-IT1	0.107196	0.611019	0.156	0.294	1
TTC14	0.685715	0.609547	0.247	0.358	1
PNPLA3	0.794959	0.603874	0.208	0.28	1
LINC01004	0.370497	0.602814	0.169	0.263	1
INAFM1	0.0308057	0.598435	0.143	0.314	1
ABHD18	0.346573	0.587308	0.208	0.331	1
CNN2	0.0749835	0.582561	0.649	0.976	1
GK5	0.126018	0.581957	0.234	0.433	1
C11orf72	0.087095	0.580105	0.26	0.505	1
ADI1	0.0116153	0.579681	0.195	0.44	1
FAM227A	0.50567	0.56763	0.247	0.379	1
NEAT1	0.0212384	0.566346	0.974	1	1
FLJ42627	0.856769	0.565097	0.195	0.253	1
HAUS2	0.517412	0.563666	0.247	0.379	1
ACER3	0.146321	0.558686	0.221	0.399	1
XIAP	0.0181851	0.557982	0.273	0.601	1
FOXC1	4.89859e-05	0.55718	0.13	0.447	1
VPS53	0.0483929	0.557029	0.234	0.468	1
CLEC2D	0.413149	0.553316	0.195	0.3	1
SLC7A5P2	0.233379	0.552828	0.169	0.283	1
FECH	0.152771	0.552181	0.182	0.324	1
ERCC6L2	0.0922605	0.546812	0.143	0.276	1
CHRAC1	0.0250077	0.544463	0.351	0.754	1
LINC01602	0.83446	0.539817	0.221	0.266	1
PLPP5	0.0229409	0.538679	0.247	0.532	1
SEC23IP	0.0473339	0.533451	0.234	0.478	1
PRR11	0.507699	0.532178	0.234	0.355	1
FBXO44	0.00277967	0.531637	0.182	0.461	1
HOOK3	0.00175733	0.530382	0.273	0.655	1
MYO9B	0.0383055	0.530056	0.169	0.352	1
IRGQ	0.0344095	0.528019	0.143	0.311	1
IL6ST	0.0137019	0.527967	0.221	0.488	1
ASCC1	0.000610798	0.52645	0.169	0.471	1
MUC4	0.189239	0.526308	0.325	0.536	1
CRIPT	0.152089	0.525602	0.286	0.529	1
METTL21A	0.495605	0.51977	0.195	0.29	1
SYTL1	0.000674083	0.518981	0.143	0.416	1
IFITM2	0.401161	0.518943	0.468	0.795	1
MT-TL1	0.00242591	0.517482	0.273	0.652	1
NBEAL2	0.000641975	0.515123	0.091	0.317	1
BET1	0.268599	0.514378	0.234	0.389	1
CCNL2	0.00150612	0.509681	0.273	0.669	1
CDK5RAP3	0.000207082	0.509512	0.299	0.771	1
TERF1	0.109756	0.508995	0.351	0.693	1
HMGXB3	1.1929e-05	0.505882	0.104	0.427	0.257701
TLR8-AS1	0.323231	0.503655	0.182	0.287	1
RNU4ATAC	0.0665068	0.503139	0.182	0.358	1
GOLGA5	3.73322e-05	0.501958	0.117	0.43	0.806488
BAIAP3	0.0388071	0.501776	0.13	0.28	1
ADAT1	0.271395	0.500335	0.195	0.321	1
CXXC5	3.77082e-16	-0.501197	0.091	0.72	8.14609e-12
CHMP2A	1.40686e-14	-0.501515	0.13	0.761	3.03925e-10
CHMP5	9.10225e-20	-0.502761	0.13	0.867	1.96636e-15
RPS20	3.41275e-11	-0.502767	0.818	1	7.37257e-07
PRDX3	1.59854e-12	-0.503452	0.247	0.881	3.45333e-08
RCN2	4.54932e-15	-0.50439	0.065	0.642	9.82791e-11
APEH	5.20631e-15	-0.505246	0.039	0.597	1.12472e-10
C6orf48	4.71773e-14	-0.5063	0.182	0.84	1.01917e-09
RPL9	6.14926e-11	-0.506362	0.727	0.997	1.32842e-06
RNF220	1.22743e-15	-0.506457	0.013	0.56	2.65163e-11
SQLE	1.02032e-13	-0.506568	0.143	0.761	2.2042e-09
TAX1BP1	8.83673e-17	-0.506638	0.13	0.812	1.909e-12
SEP15	4.64892e-17	-0.507166	0.156	0.884	1.00431e-12
PHB	1.43223e-10	-0.507416	0.286	0.86	3.09405e-06
IMP4	2.78223e-16	-0.507829	0.052	0.648	6.01046e-12
PNMA1	6.93462e-14	-0.509423	0.13	0.73	1.49809e-09
SH3BGRL	7.44538e-17	-0.50975	0.026	0.618	1.60843e-12
KIAA1522	7.96502e-12	-0.509812	0.26	0.891	1.72068e-07
NDUFA8	1.3753e-16	-0.510297	0.065	0.683	2.97105e-12
ATRX	1.91687e-12	-0.510846	0.195	0.819	4.14101e-08
IFT57	4.29037e-17	-0.511376	0.039	0.648	9.26848e-13
CLTA	9.44543e-18	-0.511398	0.143	0.853	2.0405e-13
SIGMAR1	9.81782e-14	-0.511788	0.13	0.747	2.12094e-09
TMED9	2.38451e-15	-0.512316	0.182	0.867	5.15125e-11
ANO6	3.89711e-17	-0.512561	0.065	0.696	8.41893e-13
SERTAD2	5.95737e-14	-0.51295	0.117	0.706	1.28697e-09
SEC13	3.52229e-15	-0.513931	0.143	0.788	7.60921e-11
MPC1	3.77413e-15	-0.514022	0.026	0.573	8.15326e-11
H1F0	5.93461e-13	-0.514383	0.221	0.867	1.28205e-08
C9orf16	4.11464e-12	-0.514532	0.234	0.87	8.88885e-08
MPG	4.86098e-20	-0.514603	0.039	0.706	1.05012e-15
UNG	5.64019e-14	-0.515167	0	0.488	1.21845e-09
UBA1	3.8169e-08	-0.515207	0.506	0.969	0.000824565
TIMM17A	8.19442e-17	-0.515268	0.039	0.645	1.77024e-12
FXR1	1.91763e-19	-0.515483	0.078	0.771	4.14266e-15
PNP	2.85296e-16	-0.515729	0.039	0.621	6.16326e-12
HNRNPF	1.81275e-17	-0.516242	0.169	0.891	3.91608e-13
UBC	1.37161e-07	-0.516365	0.571	0.99	0.0029631
CAMTA1	1.18921e-16	-0.517036	0.065	0.693	2.56905e-12
DDR1	1.03032e-15	-0.517274	0.052	0.638	2.22579e-11
ZAK	3.87139e-12	-0.518822	0.078	0.58	8.36335e-08
PPP1CC	3.24406e-11	-0.519665	0.26	0.901	7.00815e-07
MRPS15	1.51608e-17	-0.520118	0.091	0.744	3.27518e-13
ARPP19	1.2289e-15	-0.520774	0.117	0.775	2.65478e-11
SERINC3	7.93357e-20	-0.521732	0.078	0.795	1.71389e-15
CAP1	1.06322e-12	-0.522486	0.247	0.898	2.29688e-08
BCKDHA	3.22652e-17	-0.5228	0.065	0.693	6.97024e-13
MRPL14	7.73272e-19	-0.522862	0.065	0.741	1.6705e-14
DYNC1H1	1.96824e-17	-0.523118	0.13	0.836	4.25199e-13
CS	1.80873e-14	-0.52343	0.143	0.765	3.90739e-10
ATP5G2	2.87718e-11	-0.524348	0.351	0.976	6.21557e-07
ID1	1.24585e-06	-0.524479	0.455	0.935	0.026914
SPG21	5.63688e-18	-0.524556	0.065	0.727	1.21773e-13
H2AFY	1.74478e-15	-0.525183	0.182	0.843	3.76924e-11
SNRNP70	6.18631e-16	-0.525414	0.143	0.829	1.33643e-11
VPS25	1.34905e-17	-0.525548	0	0.58	2.91435e-13
RAD23A	1.26565e-15	-0.525852	0.221	0.915	2.73419e-11
CRIP1	8.24677e-17	-0.525875	0.104	0.775	1.78155e-12
BCAP31	1.03256e-13	-0.526515	0.221	0.925	2.23065e-09
NDUFA13	2.47349e-15	-0.526585	0.143	0.826	5.34348e-11
CDC42EP4	6.73592e-21	-0.526694	0.052	0.765	1.45516e-16
MRGBP	1.70514e-15	-0.527411	0.013	0.556	3.68362e-11
TRIM27	2.2573e-13	-0.527798	0.143	0.754	4.87644e-09
FXYD3	2.26135e-07	-0.528725	0.545	0.983	0.0048852
DCAF13	9.7177e-15	-0.528936	0.065	0.631	2.09932e-10
VOPP1	6.46938e-17	-0.529146	0.039	0.645	1.39758e-12
NDUFAB1	4.14244e-17	-0.529551	0.156	0.877	8.94891e-13
ILF2	3.39537e-16	-0.529943	0.13	0.802	7.33502e-12
LOC105377105	9.63251e-17	-0.530653	0.104	0.775	2.08091e-12
PFKFB3	2.12702e-10	-0.531576	0.091	0.556	4.59501e-06
CASC4	2.55667e-19	-0.531884	0.091	0.812	5.52317e-15
CLPX	2.71828e-17	-0.531957	0.065	0.693	5.87229e-13
BNIP3L	1.63127e-07	-0.532215	0.545	0.99	0.00352403
SCP2	1.5017e-16	-0.532531	0.182	0.87	3.24412e-12
LSM4	3.40346e-16	-0.533049	0.143	0.823	7.3525e-12
RPL23A	4.01997e-10	-0.533146	0.597	1	8.68435e-06
TFG	1.49173e-15	-0.533172	0.182	0.881	3.22259e-11
NMU	1.6854e-12	-0.534902	0.091	0.618	3.64096e-08
RPL14	2.14414e-11	-0.535029	0.818	0.997	4.63198e-07
SAMM50	8.87849e-19	-0.53514	0.039	0.683	1.91802e-14
INPP1	4.67777e-14	-0.53515	0.078	0.638	1.01054e-09
SLC39A1	2.39758e-16	-0.535522	0.091	0.72	5.1795e-12
AHSA1	4.16558e-20	-0.536005	0.091	0.829	8.9989e-16
TPM3	9.07571e-09	-0.536382	0.429	0.935	0.000196063
FAT1	1.91688e-11	-0.537106	0.26	0.884	4.14104e-07
EID1	4.70879e-19	-0.537565	0.091	0.802	1.01724e-14
CARHSP1	1.98011e-15	-0.537589	0.091	0.706	4.27763e-11
PYGL	2.17038e-18	-0.537929	0.13	0.84	4.68868e-14
BST2	1.91926e-16	-0.538002	0.065	0.686	4.14618e-12
ETHE1	7.18497e-13	-0.538143	0.234	0.904	1.55217e-08
RPS27L	3.29016e-15	-0.538775	0.13	0.778	7.10773e-11
TCEA3	5.54409e-17	-0.538787	0.052	0.666	1.19769e-12
CAPN5	1.32177e-15	-0.538852	0.156	0.826	2.85542e-11
NDUFA7	2.7544e-17	-0.539076	0.104	0.775	5.95033e-13
MRPS34	4.78344e-15	-0.539632	0.143	0.795	1.03337e-10
CEBPZ	2.60461e-16	-0.539991	0.065	0.683	5.62674e-12
SOD1	1.97358e-10	-0.540042	0.351	0.959	4.26352e-06
ATP5J	8.74958e-13	-0.54049	0.286	0.922	1.89017e-08
ANLN	2.15489e-10	-0.542436	0	0.382	4.65522e-06
ISCU	5.14686e-18	-0.542959	0.117	0.823	1.11188e-13
PUF60	3.11914e-17	-0.543351	0.065	0.703	6.73828e-13
UBXN1	1.41176e-17	-0.543715	0.078	0.727	3.04983e-13
LAMP1	7.11798e-22	-0.544455	0.065	0.792	1.5377e-17
CTNNB1	1.48255e-18	-0.54489	0.104	0.802	3.20276e-14
EIF4H	2.92237e-09	-0.544985	0.403	0.983	6.31319e-05
ITGB4	4.66884e-09	-0.545225	0.351	0.874	0.000100861
GIPC1	6.87104e-17	-0.545441	0.078	0.72	1.48435e-12
EPHX1	9.469e-14	-0.545795	0.234	0.922	2.04559e-09
MPZL2	2.6236e-16	-0.545899	0.104	0.751	5.66776e-12
SSU72	1.12953e-17	-0.546331	0.117	0.823	2.44012e-13
MRPL10	4.85445e-18	-0.546454	0.013	0.618	1.04871e-13
RNF149	4.76068e-13	-0.547227	0.208	0.846	1.02845e-08
EIF2AK1	1.69594e-14	-0.547331	0.182	0.853	3.66374e-10
HNRNPM	1.48074e-13	-0.549374	0.104	0.672	3.19883e-09
CCNC	3.80906e-18	-0.549502	0.052	0.703	8.22871e-14
BRI3	6.28481e-16	-0.5498	0.143	0.819	1.35771e-11
TMEM238	9.97592e-21	-0.549942	0.052	0.761	2.1551e-16
PSMD6	3.38014e-18	-0.550476	0.052	0.683	7.30212e-14
LGALS3BP	4.97089e-13	-0.550806	0.195	0.833	1.07386e-08
MYO1E	3.94448e-15	-0.550915	0.039	0.597	8.52127e-11
ADD3	2.33112e-14	-0.550924	0.208	0.857	5.03592e-10
CAB39	1.39821e-17	-0.551147	0.013	0.608	3.02056e-13
TECR	7.14576e-17	-0.551933	0.143	0.85	1.5437e-12
TPRXL	7.48517e-14	-0.552396	0.026	0.539	1.61702e-09
VDAC2	3.13941e-11	-0.552455	0.351	0.962	6.78207e-07
STS	3.71814e-13	-0.552963	0.078	0.611	8.0323e-09
TMEM256	7.61599e-19	-0.553326	0.117	0.846	1.64528e-14
ANXA3	2.79864e-13	-0.554196	0.052	0.567	6.0459e-09
USO1	3.97829e-18	-0.554331	0.052	0.693	8.59429e-14
RPS16	7.73001e-10	-0.554369	0.714	0.997	1.66991e-05
ATP6V1F	2.96322e-13	-0.554479	0.273	0.932	6.40145e-09
ARFGEF1	7.70759e-19	-0.555594	0.078	0.771	1.66507e-14
NDUFB6	6.13515e-16	-0.555734	0.117	0.778	1.32538e-11
MRPL15	4.06287e-17	-0.555838	0.026	0.625	8.77701e-13
SLC16A1	3.51841e-14	-0.55643	0.13	0.727	7.60082e-10
NET1	9.99025e-14	-0.557218	0.221	0.887	2.15819e-09
ODC1	6.10698e-15	-0.557526	0.078	0.672	1.31929e-10
C11orf31	1.67241e-19	-0.557618	0.065	0.758	3.6129e-15
IVNS1ABP	4.76439e-18	-0.557889	0.039	0.672	1.02925e-13
CUTA	8.48695e-16	-0.558117	0.143	0.805	1.83344e-11
LSM5	1.92675e-16	-0.558164	0.026	0.608	4.16237e-12
PTGES3	4.73808e-12	-0.559006	0.351	0.969	1.02357e-07
RAB7A	2.46407e-11	-0.559123	0.286	0.925	5.32313e-07
SNU13	2.00237e-15	-0.560546	0.208	0.908	4.32573e-11
FTH1	5.1529e-07	-0.560669	0.948	1	0.0111318
NDUFA2	8.20627e-18	-0.560766	0.104	0.799	1.7728e-13
PPP2R1A	1.7381e-15	-0.560785	0.169	0.843	3.75482e-11
TRAF4	1.34157e-16	-0.560876	0.078	0.713	2.89819e-12
B4GALT5	9.42096e-15	-0.56104	0.182	0.836	2.03521e-10
MUC1	1.56872e-09	-0.561863	0.312	0.908	3.38891e-05
RPS18	2.08569e-17	-0.561905	0.169	0.904	4.50573e-13
SFT2D1	4.73028e-18	-0.562319	0.052	0.7	1.02188e-13
EEF1A2	8.27041e-07	-0.562433	0.494	0.976	0.0178666
AKAP1	2.61612e-18	-0.562605	0.026	0.652	5.65161e-14
CCDC47	8.23166e-18	-0.562971	0.078	0.747	1.77828e-13
SKP1	4.84201e-15	-0.564001	0.182	0.884	1.04602e-10
STMN1	3.58653e-11	-0.564289	0.13	0.652	7.74798e-07
STAG2	1.58204e-18	-0.564988	0.104	0.812	3.41769e-14
RBBP7	1.27416e-15	-0.565352	0.104	0.737	2.75257e-11
POMP	7.4942e-17	-0.565491	0.13	0.812	1.61897e-12
PAIP2	3.31885e-16	-0.565701	0.13	0.785	7.16972e-12
TMEM106C	9.96346e-14	-0.565777	0.052	0.587	2.15241e-09
TOMM22	1.14368e-16	-0.565948	0.091	0.727	2.47069e-12
CNOT8	1.02851e-17	-0.566194	0.052	0.679	2.2219e-13
CCT4	4.95924e-13	-0.56628	0.234	0.877	1.07134e-08
CNOT11	4.0768e-17	-0.566426	0.13	0.819	8.80712e-13
RPS17	6.74472e-09	-0.56645	0.558	0.986	0.000145706
CD63	4.34949e-13	-0.566808	0.364	0.969	9.3962e-09
RHOA	7.72347e-10	-0.567311	0.442	0.973	1.6685e-05
FBP1	1.80716e-16	-0.56834	0.104	0.754	3.904e-12
ATP5L	1.7003e-16	-0.569101	0.208	0.945	3.67317e-12
SSR1	2.85067e-14	-0.569319	0.208	0.911	6.15831e-10
CDKN1A	5.70834e-15	-0.569877	0.195	0.877	1.23317e-10
GNG5	4.84635e-14	-0.570414	0.234	0.922	1.04696e-09
P4HA1	3.11174e-12	-0.571047	0.273	0.891	6.72229e-08
HNRNPD	6.17067e-12	-0.571135	0.338	0.942	1.33305e-07
TSPAN13	5.14876e-15	-0.571968	0.091	0.693	1.11229e-10
ZNF395	6.95456e-17	-0.572041	0.117	0.795	1.50239e-12
PTBP1	9.82415e-12	-0.572321	0.286	0.932	2.12231e-07
MYL12A	1.34775e-14	-0.572334	0.26	0.939	2.91154e-10
DENR	3.70757e-17	-0.572828	0.065	0.693	8.00947e-13
MALL	2.65527e-14	-0.573436	0.065	0.621	5.73619e-10
PTTG1IP	1.8183e-08	-0.573895	0.429	0.962	0.000392808
DSTN	2.44996e-14	-0.574351	0.247	0.935	5.29266e-10
SNRPD3	2.78049e-15	-0.574732	0.13	0.785	6.0067e-11
XBP1	5.48409e-16	-0.574976	0.169	0.877	1.18473e-11
ERBB3	8.4079e-12	-0.575874	0.286	0.915	1.81636e-07
LYZ	6.4439e-09	-0.575964	0.922	1	0.000139208
SEC61B	2.14596e-17	-0.577421	0.13	0.829	4.63591e-13
TPT1	1.13043e-09	-0.578323	0.883	1	2.44206e-05
ARL6IP5	6.79415e-16	-0.579017	0.195	0.887	1.46774e-11
ZFP36	1.39473e-16	-0.579367	0.117	0.792	3.01304e-12
CSDE1	3.61733e-08	-0.579421	0.481	0.99	0.000781452
SNX6	1.74762e-18	-0.579748	0.065	0.727	3.77538e-14
UQCRC1	2.1251e-17	-0.58005	0.104	0.778	4.59084e-13
NDUFB5	1.14958e-16	-0.580372	0.156	0.843	2.48344e-12
GORASP2	3.12897e-19	-0.58077	0.065	0.744	6.75952e-15
USP14	4.29607e-15	-0.581933	0.091	0.689	9.28079e-11
UQCRB	9.99725e-17	-0.584146	0.182	0.891	2.15971e-12
RPL11	1.54305e-08	-0.584154	0.753	1	0.000333344
TOP2A	4.3915e-08	-0.584155	0.091	0.474	0.000948697
GAPDH	1.41268e-07	-0.584232	0.987	1	0.00305182
RAB10	4.48478e-18	-0.584642	0.117	0.826	9.68848e-14
DUSP1	5.8705e-13	-0.584902	0.156	0.765	1.26821e-08
SARAF	1.02538e-13	-0.58517	0.26	0.928	2.21513e-09
CCT7	1.04235e-15	-0.585705	0.13	0.771	2.2518e-11
RPS5	2.11853e-10	-0.586386	0.675	0.997	4.57666e-06
IARS2	5.678e-20	-0.586504	0.078	0.799	1.22662e-15
MYH9	6.33151e-13	-0.586553	0.286	0.952	1.3678e-08
SRI	2.33229e-17	-0.586698	0.078	0.72	5.03844e-13
NDUFS8	2.13596e-18	-0.586927	0.065	0.734	4.61432e-14
DDX5	1.95939e-11	-0.586969	0.286	0.942	4.23286e-07
MMP28	2.82757e-18	-0.588082	0.039	0.679	6.10839e-14
ACTR2	6.66348e-14	-0.588452	0.234	0.911	1.43951e-09
MCL1	2.93168e-15	-0.590148	0.195	0.881	6.33332e-11
HN1	3.49383e-14	-0.5904	0.169	0.782	7.54771e-10
GOLM1	4.61467e-22	-0.591059	0.091	0.85	9.96906e-18
HLA-B	3.18507e-12	-0.591129	0.39	0.973	6.88072e-08
SSRP1	4.53656e-17	-0.591257	0.091	0.741	9.80033e-13
DEGS2	1.64937e-17	-0.59135	0.104	0.792	3.56314e-13
SNRPF	1.84391e-16	-0.591439	0.091	0.727	3.9834e-12
TST	1.55281e-18	-0.591519	0.065	0.737	3.35454e-14
BTG1	6.98814e-15	-0.591519	0.143	0.782	1.50965e-10
TSPAN8	2.76797e-12	-0.592255	0.247	0.884	5.97964e-08
VDAC3	1.4807e-15	-0.592344	0.195	0.915	3.19876e-11
RPS19	9.95611e-11	-0.593867	0.714	1	2.15082e-06
RPL24	2.33008e-11	-0.59387	0.468	0.986	5.03367e-07
CAV2	2.13533e-10	-0.593995	0.325	0.928	4.61296e-06
SFPQ	4.71078e-14	-0.594755	0.195	0.829	1.01767e-09
SRSF7	7.87545e-18	-0.595745	0.143	0.846	1.70133e-13
DHX40	1.24084e-17	-0.596523	0.026	0.628	2.68059e-13
TMEM258	1.04238e-16	-0.597391	0.143	0.843	2.25185e-12
CAPRIN1	4.10568e-15	-0.597801	0.208	0.887	8.86951e-11
IRF2BP2	4.39828e-16	-0.597999	0.13	0.792	9.50159e-12
ANP32B	1.72277e-12	-0.598822	0.26	0.922	3.72169e-08
SERP1	4.17013e-13	-0.599111	0.26	0.928	9.00873e-09
TMBIM1	2.93226e-12	-0.602303	0.182	0.792	6.33455e-08
ZNRF1	2.70157e-18	-0.602342	0.013	0.625	5.8362e-14
TRIM2	7.58261e-16	-0.602879	0.13	0.785	1.63807e-11
MGST2	1.88113e-18	-0.603095	0.026	0.655	4.06381e-14
SRP14	1.00164e-11	-0.603228	0.377	0.969	2.16384e-07
H1FX	1.23765e-13	-0.603906	0.26	0.922	2.67369e-09
HIST1H1C	4.25109e-11	-0.604669	0.234	0.846	9.18363e-07
ALCAM	3.44363e-12	-0.605184	0.273	0.881	7.43928e-08
RNASE4	3.60621e-18	-0.60579	0.065	0.727	7.79051e-14
RPS12	9.01236e-10	-0.606492	0.779	1	1.94694e-05
KDM1A	1.65726e-12	-0.606968	0.26	0.904	3.58017e-08
APP	2.65567e-15	-0.607887	0.234	0.928	5.73705e-11
MRPL3	4.99864e-19	-0.609085	0.039	0.696	1.07986e-14
NDUFB9	2.92896e-14	-0.609682	0.286	0.932	6.32742e-10
ACBD3	4.40888e-17	-0.611117	0.052	0.672	9.52451e-13
PYCR1	7.83304e-17	-0.611378	0.091	0.73	1.69217e-12
PLP2	1.612e-22	-0.613998	0.078	0.85	3.4824e-18
ZNF703	7.25912e-16	-0.614265	0.026	0.59	1.56819e-11
PPT1	1.53187e-18	-0.614317	0.052	0.713	3.30929e-14
EPCAM	1.80112e-09	-0.614342	0.455	0.962	3.89097e-05
HNRNPUL1	5.37787e-14	-0.61511	0.273	0.925	1.16178e-09
HSD17B12	3.49232e-15	-0.615562	0.221	0.887	7.54445e-11
NDUFB8	1.29419e-16	-0.616012	0.143	0.829	2.79584e-12
PAX8-AS1	6.66069e-16	-0.617	0.104	0.744	1.43891e-11
RAD21	2.41998e-13	-0.617144	0.26	0.904	5.22789e-09
PUM1	1.11769e-14	-0.618394	0.221	0.891	2.41454e-10
SLC5A3	3.12535e-06	-0.619294	0.494	0.956	0.067517
OCIAD2	5.64289e-18	-0.619775	0.169	0.901	1.21903e-13
WDR1	2.90825e-16	-0.619938	0.13	0.805	6.28268e-12
RAB13	1.36147e-17	-0.620145	0.13	0.805	2.94118e-13
PTBP3	7.22855e-15	-0.620382	0.247	0.952	1.56158e-10
GADD45A	3.5382e-16	-0.620472	0.091	0.724	7.64358e-12
HNRNPA3	1.37789e-12	-0.620498	0.26	0.887	2.97665e-08
SFN	3.81859e-12	-0.621356	0.182	0.775	8.2493e-08
TMEM14C	2.32746e-17	-0.621418	0.078	0.734	5.02801e-13
COPZ1	4.49287e-20	-0.622244	0.117	0.853	9.70594e-16
RPL27A	3.7169e-12	-0.623073	0.753	1	8.02962e-08
NDUFS3	7.50592e-20	-0.624685	0.078	0.775	1.6215e-15
MYC	8.7445e-14	-0.625318	0.026	0.536	1.88907e-09
TTLL12	1.32962e-19	-0.625804	0.065	0.761	2.87238e-15
AAMP	6.64817e-20	-0.626029	0.091	0.805	1.4362e-15
SEPT2	1.34288e-15	-0.626065	0.221	0.908	2.90103e-11
MAL2	1.55163e-10	-0.627137	0.403	0.966	3.35199e-06
PHB2	1.28256e-17	-0.627243	0.195	0.891	2.77072e-13
RHOC	6.85225e-18	-0.628309	0.078	0.734	1.48029e-13
HIST1H4C	6.30441e-12	-0.630027	0.13	0.662	1.36194e-07
HMGA1	1.16214e-12	-0.630649	0.455	0.976	2.51058e-08
HNRNPK	5.80002e-13	-0.631971	0.325	0.969	1.25298e-08
HADHA	5.32816e-22	-0.633144	0.078	0.819	1.15104e-17
OLA1	1.33614e-14	-0.633169	0.195	0.86	2.88647e-10
LETMD1	4.65647e-18	-0.633305	0.026	0.645	1.00594e-13
NDUFS7	1.67179e-18	-0.633429	0.078	0.758	3.61157e-14
COX17	1.39622e-19	-0.633787	0.052	0.734	3.01626e-15
COX6C	4.80296e-10	-0.634296	0.481	1	1.03758e-05
KLK7	2.96803e-06	-0.634443	0.078	0.379	0.0641184
NDUFB7	7.05712e-19	-0.636818	0.065	0.73	1.52455e-14
FKBP1A	2.24003e-13	-0.637151	0.234	0.901	4.83914e-09
GPX1	1.18718e-16	-0.637221	0.182	0.901	2.56467e-12
RPL6	1.60729e-11	-0.637291	0.779	1	3.47223e-07
GLO1	4.07937e-16	-0.638578	0.143	0.836	8.81267e-12
FOXQ1	4.67427e-16	-0.639357	0.078	0.689	1.00978e-11
ID3	1.34043e-14	-0.639951	0.039	0.587	2.89573e-10
S100A10	2.06232e-13	-0.64	0.247	0.925	4.45524e-09
OXA1L	3.63156e-20	-0.640357	0.065	0.761	7.84526e-16
SLIRP	3.70007e-16	-0.642947	0.117	0.751	7.99327e-12
LSM2	1.06163e-18	-0.643111	0.052	0.713	2.29343e-14
TPPP3	7.69349e-12	-0.64359	0.169	0.727	1.66202e-07
SEC23B	2.73963e-20	-0.644969	0.013	0.669	5.91843e-16
FBL	1.37475e-14	-0.645561	0.195	0.84	2.96987e-10
ANXA4	8.39434e-20	-0.647051	0.091	0.792	1.81343e-15
CLDN7	6.32423e-10	-0.64757	0.468	0.976	1.36622e-05
MTCH2	4.18621e-17	-0.649167	0.078	0.71	9.04347e-13
CANX	7.73335e-12	-0.649284	0.338	0.983	1.67064e-07
C4orf3	7.4806e-17	-0.650453	0.234	0.959	1.61603e-12
GALNT1	2.67387e-18	-0.650852	0.078	0.754	5.77636e-14
RPS9	1.56392e-11	-0.651618	0.532	1	3.37853e-07
INSIG1	1.16479e-10	-0.652415	0.286	0.898	2.51629e-06
PSMB4	5.81942e-16	-0.653389	0.221	0.908	1.25717e-11
CTNNA1	3.71382e-14	-0.654698	0.221	0.891	8.02296e-10
ANP32E	3.72394e-17	-0.654936	0.117	0.788	8.04482e-13
ANO1	5.13368e-17	-0.655522	0.013	0.594	1.10903e-12
PSMA6	2.94986e-15	-0.65576	0.208	0.915	6.37259e-11
YTHDF2	1.30443e-16	-0.655784	0.143	0.833	2.81796e-12
RPL13	1.76489e-14	-0.656626	0.974	1	3.81269e-10
APRT	2.59979e-20	-0.656988	0.078	0.788	5.61632e-16
MYL6	6.03084e-11	-0.657067	0.377	0.949	1.30284e-06
KLK10	8.66526e-12	-0.657475	0.221	0.819	1.87196e-07
NDUFA3	1.6077e-14	-0.658664	0.26	0.904	3.47313e-10
SLMAP	1.46904e-20	-0.658692	0.039	0.727	3.17356e-16
PSMB2	3.32723e-15	-0.660298	0.195	0.857	7.18781e-11
TAF7	1.00927e-19	-0.660316	0.117	0.85	2.18032e-15
AURKAIP1	2.853e-20	-0.661209	0.052	0.751	6.16334e-16
GHITM	2.93478e-15	-0.661756	0.208	0.891	6.34001e-11
NPM1	3.1439e-09	-0.662083	0.571	0.986	6.79177e-05
MRPL42	3.4649e-18	-0.662228	0.065	0.71	7.48521e-14
KLK1	1.83157e-16	-0.662577	0.104	0.751	3.95674e-12
RPL22	2.74785e-14	-0.662766	0.429	0.983	5.93617e-10
EIF3K	6.45425e-17	-0.662964	0.156	0.863	1.39431e-12
TKT	1.99732e-13	-0.663041	0.273	0.898	4.31481e-09
ALDOA	5.30502e-10	-0.663643	0.779	1	1.14604e-05
SCD	0.000198117	-0.663858	0.909	1	1
RPL7A	3.96376e-11	-0.664835	0.714	0.997	8.56292e-07
TMED2	6.16428e-15	-0.66504	0.26	0.935	1.33167e-10
CHPF	2.61326e-17	-0.665241	0.065	0.7	5.64542e-13
ACTR3	3.29323e-18	-0.665889	0.091	0.775	7.11436e-14
IGFBP3	2.4981e-06	-0.667606	0.247	0.666	0.0539665
PSMA3	1.62627e-17	-0.668699	0.117	0.795	3.51323e-13
NDUFS6	3.83153e-18	-0.669626	0.091	0.775	8.27725e-14
PFN2	6.18672e-18	-0.669677	0.117	0.802	1.33652e-13
RAN	3.94528e-12	-0.670303	0.299	0.911	8.52298e-08
NQO1	5.03655e-12	-0.670559	0.442	0.959	1.08805e-07
SUCLG1	4.69918e-22	-0.670568	0.052	0.788	1.01516e-17
HNRNPA1	6.0811e-11	-0.670934	0.468	0.976	1.3137e-06
RPL10	2.62927e-11	-0.671209	0.792	1	5.68001e-07
CD70	8.29556e-10	-0.671861	0.494	0.973	1.79209e-05
CA9	9.47332e-10	-0.672729	0.156	0.642	2.04652e-05
GDI2	1.51761e-17	-0.673378	0.143	0.87	3.27848e-13
TMSB4X	4.15518e-09	-0.673693	0.87	1	8.97644e-05
PRDX2	3.54169e-13	-0.67457	0.312	0.949	7.65112e-09
PSMG2	2.69659e-18	-0.675877	0.078	0.747	5.82544e-14
SLC12A2	1.78489e-10	-0.676004	0.104	0.573	3.85591e-06
TUBB4B	7.48934e-18	-0.677402	0.156	0.857	1.61792e-13
CLDN3	2.87388e-10	-0.677749	0.429	0.983	6.20844e-06
CYCS	3.36908e-08	-0.677844	0.403	0.87	0.000727822
PCNA	2.85414e-11	-0.679051	0.039	0.488	6.1658e-07
AHNAK	7.02197e-16	-0.679647	0.208	0.915	1.51696e-11
AP1G1	1.51974e-21	-0.679949	0.052	0.771	3.2831e-17
RPLP2	8.49989e-11	-0.682028	0.727	1	1.83623e-06
PSAP	1.39657e-15	-0.682735	0.299	0.969	3.01701e-11
PSMD7	5.58935e-20	-0.684129	0.104	0.833	1.20747e-15
RPL15	1.52894e-12	-0.686165	0.818	0.997	3.30297e-08
STT3B	1.2093e-21	-0.687012	0.091	0.843	2.61246e-17
LOC100505817	2.52292e-14	-0.687192	0.221	0.874	5.45027e-10
CLDN4	2.28178e-10	-0.687639	0.597	0.993	4.92933e-06
REEP5	3.45638e-20	-0.688258	0.065	0.765	7.46681e-16
CTSD	2.00361e-12	-0.68876	0.325	0.935	4.3284e-08
ABCD3	6.95495e-18	-0.691008	0.065	0.717	1.50248e-13
PRR13	2.06851e-19	-0.691752	0.117	0.867	4.4686e-15
MGST1	1.16757e-15	-0.693912	0.143	0.788	2.52229e-11
YWHAB	2.52794e-10	-0.694	0.468	0.942	5.46112e-06
LBR	1.69001e-15	-0.695737	0.104	0.73	3.65094e-11
GOT2	4.2862e-18	-0.697656	0.039	0.669	9.25947e-14
ROMO1	2.30557e-20	-0.698498	0.117	0.867	4.98071e-16
PSMD8	1.6304e-17	-0.698725	0.065	0.706	3.52216e-13
HSD17B11	2.24658e-19	-0.699147	0.117	0.85	4.8533e-15
HDGF	8.6475e-12	-0.700059	0.429	0.98	1.86812e-07
MANF	2.55088e-18	-0.700582	0.039	0.666	5.51067e-14
ATP5G1	3.54569e-18	-0.701676	0.078	0.751	7.65975e-14
CALM1	8.69823e-11	-0.702831	0.623	0.993	1.87908e-06
OAS1	2.22526e-12	-0.703126	0.117	0.652	4.80723e-08
EIF4G2	5.22981e-11	-0.704032	0.416	0.983	1.1298e-06
FHL2	3.29026e-14	-0.704734	0.26	0.925	7.10795e-10
HNRNPAB	1.18602e-16	-0.705999	0.117	0.768	2.56215e-12
KDELR1	4.57017e-13	-0.708296	0.338	0.966	9.87295e-09
ECHS1	8.84942e-16	-0.70862	0.208	0.894	1.91174e-11
NDUFV2	9.18064e-18	-0.709024	0.169	0.894	1.98329e-13
PRR15	1.55361e-19	-0.709164	0.039	0.706	3.35626e-15
COX5B	1.12182e-13	-0.70928	0.338	0.969	2.42347e-09
ANXA1	1.11604e-14	-0.709967	0.338	0.976	2.41099e-10
CNBP	2.25236e-15	-0.71011	0.195	0.884	4.86578e-11
TPD52	4.621e-18	-0.710891	0.143	0.863	9.98274e-14
OAZ1	2.45012e-13	-0.710906	0.481	0.99	5.293e-09
SEC11A	5.56818e-20	-0.711377	0.143	0.884	1.20289e-15
ALDH3A2	7.95749e-19	-0.711788	0.117	0.826	1.71906e-14
H2AFZ	4.57878e-12	-0.712181	0.325	0.942	9.89154e-08
AP1M2	4.15627e-21	-0.712737	0.117	0.887	8.97879e-17
RPS10	3.60773e-17	-0.712806	0.182	0.908	7.79379e-13
RPS27A	8.33014e-13	-0.713656	0.649	1	1.79956e-08
HIST1H2BK	6.40488e-18	-0.714828	0.169	0.901	1.38365e-13
RPS8	1.2903e-13	-0.715317	0.792	1	2.78743e-09
SNHG6	5.44067e-14	-0.715475	0.273	0.949	1.17535e-09
RAC1	3.88374e-12	-0.717245	0.481	0.983	8.39005e-08
AGR3	2.60682e-17	-0.718299	0.182	0.877	5.63152e-13
RPL19	6.5935e-12	-0.719052	0.74	1	1.42439e-07
NACA	4.25305e-18	-0.720149	0.221	0.945	9.18787e-14
BLCAP	7.43918e-20	-0.720917	0.026	0.686	1.60709e-15
ALDH2	2.65291e-18	-0.722253	0.078	0.741	5.73108e-14
MRPL34	3.00393e-22	-0.724891	0.065	0.809	6.4894e-18
RPS25	1.33676e-12	-0.728544	0.597	1	2.88781e-08
NIPSNAP1	6.52994e-21	-0.728725	0.078	0.802	1.41066e-16
SYNGR2	1.65833e-20	-0.729064	0.065	0.778	3.5825e-16
HHLA2	7.21332e-08	-0.729158	0.87	1	0.00155829
AGR2	7.48392e-12	-0.72972	0.338	0.915	1.61675e-07
HMGCS1	2.52836e-16	-0.730404	0.078	0.703	5.46201e-12
FBXO7	8.34591e-20	-0.73053	0.117	0.85	1.80297e-15
PEBP1	2.01768e-17	-0.731036	0.169	0.867	4.3588e-13
SDHB	2.43813e-17	-0.732044	0.182	0.881	5.2671e-13
PTGR1	4.80999e-19	-0.732684	0.026	0.666	1.0391e-14
ENSA	8.61163e-19	-0.73326	0.091	0.778	1.86037e-14
HLA-C	2.61747e-13	-0.733537	0.364	0.966	5.65452e-09
NAA50	1.61877e-18	-0.733832	0.143	0.863	3.49703e-14
TCP1	1.58341e-15	-0.735453	0.182	0.84	3.42063e-11
CALM2	1.94756e-11	-0.73676	0.429	0.98	4.20732e-07
KHDRBS1	2.27217e-17	-0.73706	0.156	0.877	4.90858e-13
MRFAP1	1.03449e-15	-0.737635	0.286	0.956	2.23482e-11
TUFM	1.65181e-14	-0.737862	0.273	0.925	3.5684e-10
RPL10A	1.47515e-13	-0.738401	0.545	0.983	3.18676e-09
TSPO	3.39083e-14	-0.739129	0.299	0.969	7.32521e-10
NARS	1.10886e-17	-0.740016	0.182	0.891	2.39547e-13
ATP5D	1.06736e-18	-0.741012	0.182	0.908	2.30582e-14
DNAJB1	1.11745e-18	-0.743591	0.104	0.805	2.41404e-14
RPS7	1.04128e-12	-0.743724	0.74	0.997	2.24947e-08
TMEM147	5.71636e-20	-0.745149	0.052	0.737	1.23491e-15
YWHAE	4.34733e-11	-0.750865	0.519	0.993	9.39153e-07
UBE2D2	1.38107e-18	-0.751247	0.104	0.792	2.98353e-14
CSTB	3.47281e-12	-0.753941	0.753	1	7.50231e-08
AZIN1	2.10064e-21	-0.754653	0.065	0.799	4.53802e-17
PFDN5	7.40903e-17	-0.755808	0.182	0.874	1.60057e-12
BMP4	2.28267e-12	-0.757287	0.299	0.915	4.93126e-08
RPL27	3.25792e-15	-0.758668	0.494	0.997	7.03809e-11
ATP5A1	1.73147e-11	-0.759146	0.468	0.952	3.7405e-07
CYB5B	5.66301e-13	-0.76142	0.377	0.962	1.22338e-08
BTBD16	1.21582e-18	-0.763674	0.078	0.761	2.62654e-14
SLC9A3R1	1.10615e-20	-0.763762	0.078	0.799	2.38962e-16
FABP5	8.99627e-14	-0.763931	0.169	0.758	1.94346e-09
EMP2	8.61472e-13	-0.764027	0.273	0.901	1.86104e-08
ARF1	1.47497e-14	-0.76432	0.364	0.962	3.18637e-10
PAICS	2.24887e-15	-0.764613	0.247	0.894	4.85824e-11
ATP2A2	4.98693e-22	-0.76911	0.078	0.836	1.07733e-17
UBB	7.13022e-12	-0.773464	0.519	0.99	1.54034e-07
ABHD2	1.57581e-14	-0.775512	0.234	0.884	3.40421e-10
IDH1	2.04007e-18	-0.776169	0.156	0.86	4.40717e-14
TMED10	2.6748e-18	-0.779721	0.156	0.894	5.77838e-14
SLC25A3	4.46153e-11	-0.781006	0.455	0.98	9.63824e-07
PDLIM1	1.34074e-17	-0.78229	0.234	0.942	2.8964e-13
RPS6	3.20466e-14	-0.783625	0.727	0.993	6.92303e-10
RPS3A	4.11436e-14	-0.784576	0.714	1	8.88824e-10
RCN1	4.41496e-22	-0.788912	0.065	0.792	9.53764e-18
NUCKS1	7.52997e-16	-0.789919	0.195	0.867	1.6267e-11
TM9SF3	4.82736e-18	-0.789973	0.221	0.945	1.04285e-13
NDRG1	1.10815e-05	-0.790419	0.571	0.949	0.239395
SPINT2	2.31202e-13	-0.791371	0.805	0.993	4.99465e-09
UCA1	1.63646e-09	-0.791392	0.636	0.993	3.53524e-05
HSPA8	3.56378e-12	-0.792068	0.442	0.932	7.69883e-08
MAPK1	1.68793e-22	-0.793118	0.052	0.785	3.64643e-18
RPL18	1.33293e-13	-0.793118	0.61	1	2.87954e-09
FOSB	1.41521e-12	-0.793187	0.26	0.843	3.05728e-08
RPLP1	3.30755e-12	-0.793402	0.662	0.997	7.14529e-08
UQCR11	4.07868e-21	-0.794083	0.117	0.87	8.81118e-17
KLF3	7.78752e-20	-0.795666	0.052	0.737	1.68234e-15
NDUFA6	3.70408e-20	-0.798398	0.091	0.799	8.00192e-16
NDUFA5	1.33672e-20	-0.798408	0.104	0.85	2.88771e-16
PPARG	5.70704e-23	-0.798565	0.065	0.826	1.23289e-18
CTSH	5.07764e-17	-0.800061	0.104	0.758	1.09692e-12
IER2	1.19589e-13	-0.800222	0.273	0.901	2.58349e-09
ITGA6	1.66601e-14	-0.800792	0.338	0.969	3.59909e-10
CCNG2	3.12295e-20	-0.801795	0.039	0.717	6.7465e-16
EHF	4.39894e-15	-0.8046	0.26	0.928	9.50303e-11
ACTG1	1.07429e-15	-0.804685	0.753	1	2.32079e-11
TMEM54	5.79069e-19	-0.805219	0.156	0.894	1.25096e-14
C1QBP	6.70799e-17	-0.805846	0.065	0.679	1.44913e-12
HNRNPA2B1	4.5568e-13	-0.806292	0.403	0.976	9.84405e-09
KIF5B	7.11085e-14	-0.806397	0.312	0.949	1.53616e-09
TPST2	1.24987e-15	-0.806725	0.117	0.741	2.70009e-11
RTN3	6.05239e-16	-0.808735	0.273	0.962	1.3075e-11
PPIA	4.363e-15	-0.808847	0.844	1	9.42539e-11
UQCRC2	1.04262e-16	-0.810818	0.247	0.945	2.25236e-12
PRDX1	8.20613e-13	-0.811644	0.39	0.99	1.77277e-08
S100A6	1.61279e-12	-0.813604	0.935	1	3.4841e-08
HSP90AB1	1.44444e-12	-0.81395	0.675	0.99	3.12042e-08
SSR2	7.53915e-25	-0.815803	0.104	0.922	1.62868e-20
HMGB1	7.78773e-10	-0.815889	0.468	0.962	1.68238e-05
EEF1G	2.65099e-14	-0.817205	0.623	0.986	5.72694e-10
ADAR	2.57612e-19	-0.819052	0.091	0.792	5.56519e-15
XRCC6	3.67676e-18	-0.81996	0.156	0.857	7.9429e-14
HPGD	3.89161e-11	-0.820297	0.104	0.59	8.40705e-07
COX5A	2.25489e-20	-0.822502	0.169	0.915	4.87123e-16
COX7B	4.16398e-14	-0.822895	0.312	0.969	8.99544e-10
COX8A	3.59889e-14	-0.824009	0.377	0.966	7.77467e-10
SSBP1	1.11622e-21	-0.833476	0.039	0.747	2.41136e-17
COX7A2	6.2607e-15	-0.83426	0.273	0.956	1.3525e-10
RPL12	1.00784e-14	-0.835664	0.701	1	2.17723e-10
ZNF664	4.62253e-22	-0.836806	0.039	0.754	9.98605e-18
RARRES1	8.48772e-17	-0.83901	0.156	0.829	1.8336e-12
COX4I1	1.32684e-15	-0.84025	0.416	0.986	2.86636e-11
H3F3B	3.30205e-14	-0.841687	0.325	0.973	7.13343e-10
HSPA5	6.0475e-11	-0.844632	0.455	0.969	1.30644e-06
PHLDA1	4.30071e-12	-0.848285	0.312	0.891	9.29082e-08
CYSTM1	1.33151e-16	-0.850249	0.273	0.959	2.87646e-12
PGK1	2.41738e-11	-0.850589	0.545	0.99	5.22226e-07
PAPOLA	7.17596e-18	-0.85065	0.247	0.952	1.55022e-13
EIF3L	1.28845e-19	-0.851461	0.234	0.959	2.78344e-15
GPX2	1.85957e-15	-0.852544	0.26	0.918	4.01723e-11
EEF2	9.28068e-14	-0.853153	0.61	1	2.00491e-09
UBE2L3	6.51316e-22	-0.855665	0.104	0.85	1.40704e-17
RPS14	7.51254e-14	-0.855797	0.481	0.99	1.62293e-09
ATP1B3	2.48385e-17	-0.856646	0.208	0.887	5.36585e-13
LAPTM4A	4.0141e-16	-0.857216	0.26	0.942	8.67165e-12
MLEC	2.47852e-13	-0.86324	0.403	0.973	5.35436e-09
FOS	5.06276e-11	-0.868437	0.532	0.976	1.09371e-06
LDHB	8.59704e-17	-0.868975	0.221	0.894	1.85722e-12
PPP1R1B	7.63323e-16	-0.869521	0.221	0.904	1.64901e-11
ALDH1A1	7.32845e-10	-0.870233	0.195	0.683	1.58317e-05
PSMA1	4.85631e-21	-0.870546	0.117	0.853	1.04911e-16
TFF3	9.61053e-12	-0.871081	0.649	0.993	2.07616e-07
YBX1	1.10462e-12	-0.871132	0.649	0.986	2.3863e-08
FTL	5.91281e-13	-0.871334	0.662	0.993	1.27734e-08
NCL	6.05614e-20	-0.872265	0.117	0.86	1.30831e-15
DNALI1	6.93277e-19	-0.872517	0.195	0.928	1.49769e-14
ALPP	1.4525e-09	-0.876019	0.052	0.44	3.13783e-05
SLC22A18	1.58277e-21	-0.876327	0.026	0.717	3.41926e-17
CHCHD10	2.04542e-17	-0.879407	0.247	0.928	4.41871e-13
NDUFS5	6.86422e-20	-0.880742	0.169	0.908	1.48288e-15
EEF1A1	1.42348e-14	-0.882158	0.987	1	3.07514e-10
CALB1	1.60308e-12	-0.882425	0.714	0.997	3.46312e-08
EIF3H	1.47299e-16	-0.88253	0.273	0.949	3.18211e-12
ADIRF	2.61723e-11	-0.883672	0.506	0.99	5.65401e-07
ECH1	2.27247e-16	-0.887308	0.247	0.922	4.90922e-12
NUTF2	1.22558e-24	-0.891301	0.026	0.768	2.64762e-20
ATP5F1	1.65706e-17	-0.893673	0.195	0.911	3.57975e-13
TSPAN1	2.60549e-17	-0.895223	0.208	0.884	5.62863e-13
RPL7	2.53949e-15	-0.895985	0.74	0.997	5.48607e-11
HSPD1	7.46699e-14	-0.901706	0.351	0.942	1.61309e-09
CLDN1	1.73253e-11	-0.903954	0.351	0.881	3.74279e-07
HSPB1	2.9105e-14	-0.904631	0.818	1	6.28756e-10
FGFBP1	8.44981e-14	-0.905031	0.234	0.863	1.82541e-09
TMBIM6	7.25468e-16	-0.908112	0.623	1	1.56723e-11
UQCRFS1	3.76035e-21	-0.917564	0.117	0.857	8.12349e-17
PTMA	3.2468e-15	-0.922112	0.922	1	7.01405e-11
MDH1	1.34186e-22	-0.9302	0.104	0.846	2.89883e-18
S100A14	7.62521e-13	-0.934408	0.494	0.997	1.64727e-08
KRT8	1.67827e-15	-0.939101	0.74	1	3.62557e-11
RHOU	1.5477e-20	-0.942102	0.065	0.761	3.34349e-16
ANK1	1.20752e-18	-0.943161	0.182	0.881	2.6086e-14
SNRPB	3.79515e-20	-0.945761	0.169	0.908	8.19866e-16
RPS4X	1.28782e-15	-0.945915	0.558	0.997	2.78207e-11
PARK7	1.74121e-21	-0.946834	0.091	0.833	3.76153e-17
ATP5G3	7.42266e-17	-0.948778	0.286	0.935	1.60352e-12
ASS1	1.42564e-07	-0.949836	0.74	0.986	0.0030798
PGAM1	2.33074e-21	-0.950223	0.13	0.901	5.0351e-17
RAB25	4.33374e-20	-0.954032	0.234	0.932	9.36218e-16
FDFT1	3.41835e-15	-0.955295	0.429	0.983	7.38467e-11
ATPIF1	4.12165e-19	-0.956387	0.247	0.942	8.90399e-15
COX6A1	2.80875e-17	-0.957255	0.545	0.997	6.06775e-13
ARPC3	2.46783e-20	-0.958159	0.156	0.877	5.33126e-16
TOB1	2.03672e-14	-0.961836	0.325	0.973	4.39992e-10
CYC1	8.23831e-19	-0.963498	0.221	0.928	1.77972e-14
RPL4	1.10699e-16	-0.965558	0.727	0.993	2.39144e-12
ARPC5	1.15298e-23	-0.966325	0.117	0.915	2.49078e-19
RACK1	3.10333e-16	-0.967164	0.714	1	6.70412e-12
RPL5	4.82378e-16	-0.971806	0.571	0.997	1.04208e-11
DUSP6	6.10306e-18	-0.972971	0.143	0.833	1.31844e-13
CHCHD2	7.83399e-17	-0.974949	0.429	0.983	1.69238e-12
HSP90B1	4.8821e-16	-0.975911	0.442	0.969	1.05468e-11
KRT18	3.28475e-14	-0.980251	0.506	0.973	7.09605e-10
MARCKSL1	1.15872e-20	-0.983152	0.208	0.945	2.50319e-16
CD9	1.1535e-14	-0.986018	0.455	0.993	2.49191e-10
RPS3	1.39523e-18	-0.988282	0.74	0.997	3.01411e-14
SRP9	4.72897e-16	-0.989974	0.377	0.976	1.0216e-11
PABPC1	2.43319e-17	-0.990375	0.675	0.997	5.25642e-13
SDC1	4.75151e-15	-0.995193	0.338	0.959	1.02647e-10
ATP5H	8.8406e-20	-1.00166	0.208	0.935	1.90983e-15
S100A4	2.08945e-16	-1.01002	0.753	1	4.51385e-12
EEF1B2	3.01228e-15	-1.01103	0.468	0.983	6.50744e-11
TSC22D1	5.58616e-17	-1.01264	0.221	0.932	1.20678e-12
S100A16	2.27638e-15	-1.01567	0.312	0.959	4.91766e-11
PSMB1	3.04562e-21	-1.02235	0.195	0.949	6.57945e-17
TPI1	2.93245e-16	-1.03785	0.584	0.997	6.33496e-12
PSCA	1.94903e-10	-1.05043	0.364	0.863	4.21048e-06
RPL8	5.0829e-20	-1.05087	0.688	1	1.09806e-15
EIF3F	4.7897e-25	-1.05746	0.104	0.908	1.03472e-20
ACTB	2.49206e-15	-1.05769	0.584	0.993	5.38359e-11
RPL13A	6.32784e-17	-1.05868	0.442	0.986	1.367e-12
RPL3	2.9436e-18	-1.06092	0.584	1	6.35907e-14
RPS2	6.79994e-18	-1.06379	0.831	0.997	1.46899e-13
SLC25A5	7.10296e-18	-1.06471	0.338	0.952	1.53445e-13
GGH	1.65205e-21	-1.06578	0.078	0.799	3.56893e-17
FAM169A	1.82517e-20	-1.06907	0.091	0.795	3.94291e-16
DBI	1.77218e-21	-1.07245	0.156	0.908	3.82845e-17
CLIC1	2.20524e-17	-1.07848	0.325	0.986	4.76398e-13
SLC2A1	6.82707e-10	-1.08408	0.571	0.966	1.47485e-05
ATP5O	1.83627e-19	-1.08723	0.221	0.949	3.9669e-15
ATP5B	4.07469e-18	-1.10261	0.506	0.976	8.80255e-14
EIF3E	2.40767e-18	-1.10578	0.351	0.976	5.20129e-14
LGALS4	4.19003e-18	-1.10679	0.286	0.939	9.05171e-14
ATP1A1	2.23251e-18	-1.10973	0.208	0.952	4.82289e-14
BTF3	3.0652e-19	-1.11819	0.299	0.986	6.62174e-15
TUBA1B	4.31858e-11	-1.11901	0.325	0.898	9.32942e-07
YWHAQ	1.42034e-23	-1.12091	0.182	0.928	3.06837e-19
AKR1C3	9.13765e-17	-1.1236	0.143	0.778	1.97401e-12
ENO1	1.01822e-17	-1.12735	0.688	1	2.19966e-13
PERP	8.22796e-19	-1.14062	0.273	0.966	1.77749e-14
ANXA2	8.7349e-16	-1.15228	0.403	0.966	1.887e-11
MYL12B	1.56411e-19	-1.16312	0.377	0.983	3.37894e-15
TAGLN2	1.31722e-16	-1.18227	0.429	0.986	2.84558e-12
HSP90AA1	1.27742e-15	-1.19119	0.623	0.99	2.75961e-11
LDHA	1.08739e-17	-1.19358	0.74	0.997	2.34909e-13
HNRNPU	8.60738e-24	-1.20149	0.169	0.939	1.85945e-19
AQP3	3.11492e-08	-1.22435	0.455	0.874	0.000672916
KRT19	3.22605e-16	-1.22677	0.545	0.983	6.96924e-12
ATP5C1	2.47023e-22	-1.26887	0.169	0.925	5.33644e-18
GSTP1	1.39911e-21	-1.29323	0.364	0.976	3.0225e-17
MDH2	5.50753e-28	-1.34442	0.065	0.884	1.18979e-23
RPLP0	4.08641e-21	-1.34544	0.506	0.993	8.82787e-17

## Sheet: DEG Cluster4 caf
GENES	p_val	avg_log2FC	pct.1	pct.2	p_val_adj
LINC01279	4.93059e-74	2.25363	0.994	0.195	1.06516e-69
COL3A1	4.71434e-63	2.03381	1	0.702	1.01844e-58
CCDC80	4.62011e-53	1.9169	1	0.649	9.98083e-49
COL1A1	1.46605e-55	1.87306	1	0.855	3.1671e-51
TMX4	1.22164e-41	1.85382	0.994	0.489	2.63911e-37
HEG1	5.49711e-67	1.8529	1	0.481	1.18754e-62
CXCL2	1.85594e-59	1.71883	0.811	0.065	4.00938e-55
PDGFRA	7.11507e-63	1.71025	0.997	0.466	1.53707e-58
CD248	8.97577e-67	1.57343	0.956	0.176	1.93904e-62
PAPPA	7.04241e-48	1.57239	0.943	0.324	1.52137e-43
ANK3	1.38089e-71	1.49097	0.899	0.08	2.98314e-67
PSAT1	7.45917e-64	1.48594	0.94	0.172	1.6114e-59
COL1A2	1.35721e-46	1.46172	1	0.798	2.93197e-42
NAV1	6.66843e-62	1.40131	0.968	0.313	1.44058e-57
PLPP3	3.36356e-58	1.37869	0.962	0.218	7.2663e-54
SPRY1	6.82074e-67	1.3662	0.94	0.149	1.47348e-62
MFAP4	1.13399e-47	1.36222	1	0.634	2.44975e-43
CYP1B1	1.9912e-46	1.30258	0.817	0.145	4.3016e-42
CCL2	1.92248e-50	1.28965	0.956	0.263	4.15313e-46
WARS	3.50597e-62	1.28037	0.95	0.168	7.57394e-58
CFB	1.87221e-51	1.27845	0.968	0.302	4.04454e-47
H3F3B	1.1579e-54	1.26804	0.994	0.553	2.5014e-50
UNC5B	1.55476e-57	1.26098	0.915	0.179	3.35874e-53
IL1R1	5.67142e-59	1.25696	0.972	0.263	1.2252e-54
CXCL1	3.10205e-34	1.23496	0.744	0.176	6.70136e-30
COL14A1	2.8131e-49	1.23174	0.915	0.248	6.07714e-45
CLDN11	1.81797e-45	1.20174	0.997	0.553	3.92736e-41
SERPINH1	4.13046e-54	1.19883	0.994	0.492	8.92304e-50
SLC7A11	5.51388e-56	1.16448	0.953	0.206	1.19116e-51
IL6ST	5.63961e-46	1.15046	0.997	0.756	1.21833e-41
SNAI2	3.68332e-54	1.12884	0.987	0.317	7.95707e-50
FLRT2	9.73157e-69	1.10529	0.937	0.126	2.10231e-64
IARS	3.92311e-57	1.10295	0.965	0.26	8.4751e-53
SEMA3C	1.49842e-39	1.09831	0.943	0.374	3.23703e-35
MFAP2	9.53128e-59	1.09709	0.95	0.237	2.05904e-54
TGM2	1.72439e-34	1.07844	0.924	0.305	3.72521e-30
YWHAB	1.25892e-48	1.06901	0.991	0.508	2.71964e-44
LRRC17	5.72743e-50	1.06338	0.95	0.294	1.2373e-45
COL5A1	4.09808e-42	1.05585	0.972	0.527	8.85309e-38
PCDH7	2.87417e-57	1.04412	0.861	0.16	6.20907e-53
PXDN	9.27603e-43	1.03627	0.981	0.523	2.0039e-38
NREP	3.61815e-54	1.03583	0.842	0.145	7.81629e-50
DDX5	1.35197e-45	1.03403	0.997	0.576	2.92066e-41
MAN2A1	1.10635e-43	1.02852	0.984	0.527	2.39005e-39
PKDCC	5.85975e-56	1.02668	0.927	0.225	1.26588e-51
SLC1A5	3.69433e-49	1.0257	0.946	0.313	7.98086e-45
PSD3	1.95537e-46	1.016	0.965	0.347	4.22419e-42
ITGB8	2.05207e-58	1.01208	0.789	0.057	4.43308e-54
CXCL6	1.01902e-26	1.01192	0.83	0.286	2.20139e-22
ZMAT3	1.72603e-51	1.00713	0.956	0.279	3.72875e-47
SERPINE2	2.27434e-25	0.99072	1	0.897	4.91326e-21
C1S	8.65597e-44	0.975643	1	0.851	1.86995e-39
PLCB1	8.84399e-54	0.971057	0.833	0.118	1.91057e-49
ZBTB20	7.48688e-45	0.968256	0.968	0.344	1.61739e-40
NRP1	2.14552e-40	0.963934	0.975	0.511	4.63498e-36
EPRS	5.97003e-56	0.959909	0.89	0.206	1.28971e-51
ANGPTL2	4.26266e-60	0.931451	0.883	0.126	9.20862e-56
ARID5B	1.24073e-49	0.927555	0.931	0.256	2.68035e-45
TUBA1A	1.10621e-40	0.907462	0.883	0.279	2.38974e-36
PHLDA1	1.76689e-27	0.905678	0.956	0.538	3.81701e-23
TPST1	5.99118e-60	0.903837	0.893	0.156	1.29427e-55
IGF1	1.04761e-44	0.903481	0.666	0.05	2.26314e-40
KLF4	1.12196e-49	0.897522	0.849	0.164	2.42378e-45
ANKRD11	8.42064e-45	0.895074	0.937	0.34	1.81911e-40
SERPINF1	2.80838e-38	0.892168	0.981	0.439	6.06695e-34
LAMC1	7.19286e-42	0.889743	0.997	0.676	1.55387e-37
PSME3	2.36036e-65	0.887017	0.927	0.118	5.09908e-61
CDC42EP1	1.8303e-49	0.88293	0.959	0.336	3.95399e-45
SPARC	1.41421e-30	0.86879	1	0.924	3.05511e-26
COL6A3	5.87283e-29	0.864649	0.994	0.805	1.26871e-24
CXCL3	3.63075e-32	0.864401	0.562	0.073	7.8435e-28
PLAT	2.4132e-21	0.863753	0.997	0.763	5.21323e-17
SOX4	6.28579e-31	0.859835	0.975	0.469	1.35792e-26
CNP	6.20443e-63	0.857956	0.877	0.13	1.34034e-58
FOS	7.59974e-24	0.857019	0.886	0.378	1.64177e-19
IFI16	3.91955e-52	0.855358	0.956	0.271	8.46741e-48
EGR1	1.95962e-21	0.841687	0.918	0.469	4.23338e-17
EEA1	9.54626e-44	0.840375	0.946	0.324	2.06228e-39
PBX1	1.36002e-55	0.833493	0.927	0.179	2.93805e-51
HMGB1	1.37769e-41	0.833016	0.968	0.466	2.97622e-37
PTX3	1.43957e-17	0.829521	0.868	0.435	3.1099e-13
NNMT	6.89151e-50	0.82843	0.855	0.191	1.48877e-45
LOXL4	6.07117e-33	0.82121	0.53	0.05	1.31156e-28
ADH1B	8.34824e-28	0.820306	0.454	0.038	1.80347e-23
CRISPLD2	2.83897e-43	0.810981	0.82	0.179	6.13303e-39
DST	4.66062e-30	0.810168	0.95	0.511	1.00683e-25
CDC25B	7.61359e-55	0.80992	0.814	0.111	1.64476e-50
ADAM12	6.15752e-41	0.808979	0.729	0.141	1.33021e-36
CDH11	1.09098e-37	0.808342	0.965	0.401	2.35684e-33
H1FX	2.61744e-45	0.806142	0.871	0.191	5.65445e-41
CDK4	6.2396e-46	0.806076	0.946	0.332	1.34794e-41
BCAT1	2.86977e-32	0.795747	0.962	0.447	6.19956e-28
MAN1A1	2.56986e-45	0.794204	0.972	0.382	5.55167e-41
KLHL5	1.7908e-37	0.791643	0.978	0.477	3.86867e-33
STXBP5	1.11655e-54	0.787312	0.83	0.134	2.41208e-50
GLIPR1	9.43246e-35	0.784062	0.83	0.233	2.0377e-30
FAM20A	5.99372e-55	0.780056	0.726	0.05	1.29482e-50
ADAMTS5	9.90008e-44	0.778762	0.691	0.073	2.13871e-39
PCDH18	2.40045e-55	0.777952	0.83	0.115	5.18568e-51
ABCA8	6.13645e-62	0.775347	0.804	0.057	1.32566e-57
FUT8	5.9728e-59	0.772795	0.864	0.118	1.2903e-54
FOSB	7.04214e-25	0.771736	0.874	0.374	1.52131e-20
CALD1	2.69981e-33	0.771011	1	0.695	5.83241e-29
PHGDH	1.77828e-46	0.768476	0.88	0.218	3.84162e-42
SERBP1	1.44335e-43	0.767949	0.962	0.408	3.11807e-39
SLC38A1	1.81533e-48	0.766931	0.817	0.149	3.92167e-44
ISCU	1.01548e-40	0.766855	0.95	0.359	2.19375e-36
EIF5	2.56704e-40	0.765968	0.915	0.298	5.54557e-36
MARS	3.66497e-48	0.765387	0.905	0.24	7.91743e-44
PRKDC	1.52776e-54	0.764077	0.871	0.156	3.30043e-50
NFIA	3.53895e-54	0.7629	0.858	0.134	7.6452e-50
ALDH1L2	1.01313e-51	0.760666	0.83	0.134	2.18866e-47
VCAN	6.04338e-22	0.760295	0.997	0.763	1.30555e-17
FGF7	9.32766e-51	0.760041	0.792	0.107	2.01505e-46
MN1	3.13889e-59	0.75856	0.782	0.053	6.78094e-55
CDC42BPA	3.92221e-50	0.756131	0.899	0.229	8.47316e-46
RBMS1	1.17299e-35	0.750982	0.962	0.427	2.53401e-31
SARS	2.42964e-39	0.748973	0.943	0.37	5.24874e-35
SH3D19	1.40606e-58	0.748759	0.839	0.099	3.03751e-54
SLC3A2	2.3223e-30	0.746815	0.965	0.481	5.01686e-26
TNFRSF1A	1.88084e-46	0.744575	0.893	0.244	4.06318e-42
MTHFD2	7.25231e-40	0.741614	0.893	0.267	1.56672e-35
SOCS3	2.02296e-48	0.741193	0.782	0.118	4.37019e-44
OSBPL8	5.02598e-27	0.741065	0.937	0.473	1.08576e-22
EIF4G2	1.24246e-36	0.739425	0.997	0.679	2.68408e-32
HSPA8	1.06892e-28	0.737784	0.991	0.634	2.3092e-24
ZFP36L2	3.93897e-37	0.737032	0.94	0.321	8.50936e-33
ADD3	1.40917e-31	0.735193	0.981	0.546	3.04422e-27
HNRNPU	2.89325e-36	0.730103	0.968	0.469	6.25029e-32
LPAR1	4.06746e-40	0.727274	0.896	0.286	8.78694e-36
IER2	5.59411e-24	0.726885	0.826	0.374	1.2085e-19
STAT3	2.03964e-38	0.726363	0.959	0.412	4.40623e-34
PHF20L1	1.37323e-49	0.722249	0.826	0.153	2.96659e-45
C1R	8.47556e-26	0.720152	1	0.794	1.83097e-21
CAPRIN1	5.27706e-45	0.715248	0.912	0.309	1.14e-40
FTH1	4.46714e-27	0.714886	1	0.985	9.65037e-23
SYNPO2	3.57207e-51	0.712375	0.732	0.069	7.71675e-47
LARS	2.21505e-56	0.712183	0.855	0.13	4.78517e-52
ANKRD12	2.20729e-41	0.711439	0.896	0.256	4.76841e-37
CBX6	1.1678e-55	0.707592	0.801	0.08	2.5228e-51
MT-CO3	3.74197e-38	0.705573	1	1	8.08379e-34
CCPG1	3.81144e-45	0.703615	0.823	0.153	8.23385e-41
RRBP1	6.15401e-40	0.702685	0.88	0.282	1.32945e-35
PKD2	8.11546e-41	0.7013	0.956	0.324	1.75318e-36
FAM198B	5.80679e-49	0.700764	0.789	0.115	1.25444e-44
PDZRN3	1.5478e-51	0.698039	0.729	0.073	3.34372e-47
APOL6	2.28349e-45	0.694592	0.902	0.252	4.93303e-41
CALM2	1.88244e-29	0.694056	0.984	0.561	4.06663e-25
TXNRD1	5.40339e-37	0.693219	0.946	0.324	1.16729e-32
METTL7A	2.22948e-42	0.693134	0.729	0.115	4.81635e-38
IGFBP5	0.00019862	0.691536	1	0.905	1
RAD50	1.10299e-58	0.691495	0.849	0.111	2.38279e-54
DPP4	1.02985e-30	0.691361	0.978	0.489	2.22479e-26
C6orf62	1.80175e-49	0.690081	0.918	0.237	3.89232e-45
SPTSSA	1.04518e-29	0.689122	0.858	0.298	2.25791e-25
SEL1L	4.13659e-43	0.688348	0.943	0.328	8.93628e-39
POSTN	3.13336e-20	0.688183	0.549	0.141	6.76899e-16
EID1	1.35746e-35	0.686597	0.978	0.412	2.93253e-31
CDKN2B	4.67487e-45	0.686075	0.653	0.046	1.00991e-40
GPX8	6.05533e-38	0.685799	0.968	0.427	1.30813e-33
PPIC	1.65179e-39	0.684276	0.868	0.24	3.56836e-35
TSC22D1	4.19723e-39	0.683363	0.833	0.21	9.06728e-35
ABCA9	6.31476e-50	0.679485	0.741	0.088	1.36418e-45
CDKN1A	4.33568e-17	0.67888	0.975	0.538	9.36636e-13
ITGA11	1.38995e-46	0.677385	0.763	0.126	3.00271e-42
HSPA9	1.95772e-38	0.676166	0.921	0.336	4.22927e-34
CTSK	1.4639e-23	0.675407	0.968	0.546	3.16246e-19
IFIT3	9.59252e-52	0.675048	0.722	0.057	2.07227e-47
ZNF503	3.1023e-36	0.67308	0.89	0.286	6.7019e-32
C3	1.60173e-42	0.672552	0.713	0.088	3.46021e-38
BPTF	2.44389e-38	0.672248	0.883	0.279	5.27954e-34
NFE2L1	1.15919e-31	0.671475	0.981	0.592	2.5042e-27
C7orf73	8.45995e-54	0.671047	0.921	0.191	1.8276e-49
ADH5	2.36389e-37	0.670624	0.95	0.416	5.10672e-33
TLE4	4.83543e-42	0.670271	0.852	0.221	1.0446e-37
PSMD1	8.13946e-47	0.668633	0.877	0.206	1.75837e-42
ADAR	2.59213e-44	0.667943	0.934	0.298	5.59977e-40
MT-ND3	1.16154e-31	0.664639	1	1	2.50928e-27
EMILIN1	8.75078e-29	0.664406	0.927	0.427	1.89043e-24
ASNS	2.33279e-42	0.663833	0.811	0.153	5.03954e-38
MT-CYB	2.779e-33	0.663736	1	1	6.00348e-29
MARCKSL1	5.25591e-41	0.662734	0.893	0.248	1.13543e-36
PBRM1	2.49019e-52	0.660157	0.748	0.076	5.37956e-48
PLEKHA5	4.88781e-35	0.658494	0.852	0.267	1.05591e-30
CCAR1	5.07678e-42	0.654398	0.896	0.248	1.09674e-37
ENG	3.70592e-37	0.653446	0.953	0.378	8.0059e-33
ST3GAL1	4.62561e-29	0.652358	0.915	0.374	9.99271e-25
PGRMC2	4.20818e-36	0.651686	0.912	0.309	9.09094e-32
APEX1	1.00483e-42	0.651532	0.924	0.298	2.17074e-38
ASPN	1.68589e-36	0.651079	0.703	0.126	3.64203e-32
LMO4	7.80985e-37	0.651009	0.965	0.374	1.68716e-32
SMARCE1	6.28234e-40	0.649833	0.924	0.313	1.35717e-35
TCEA1	4.55437e-32	0.649484	0.975	0.523	9.83882e-28
C11orf58	7.44918e-48	0.648797	0.918	0.248	1.60925e-43
SPAG7	3.61925e-47	0.64556	0.849	0.172	7.81867e-43
JUN	2.89904e-21	0.644013	0.927	0.435	6.26279e-17
PRPF40A	1.25914e-39	0.641536	0.899	0.29	2.72013e-35
HIF1A	5.70011e-34	0.640063	0.751	0.198	1.2314e-29
WNT5A	3.66847e-31	0.637418	0.76	0.221	7.92499e-27
ERAP2	3.73227e-38	0.635996	0.927	0.294	8.06281e-34
LAMA2	1.17742e-29	0.63598	0.886	0.374	2.54358e-25
FZD2	2.65609e-59	0.635416	0.858	0.107	5.73795e-55
P3H4	1.5533e-46	0.635283	0.877	0.183	3.35559e-42
VASN	8.50346e-28	0.635162	0.909	0.355	1.837e-23
CHD4	9.42716e-38	0.632715	0.943	0.359	2.03655e-33
RDH10	1.21437e-32	0.632289	0.722	0.168	2.62341e-28
TRIOBP	8.60399e-42	0.631707	0.931	0.317	1.85872e-37
ADAMTS1	1.1492e-21	0.628744	0.83	0.347	2.48262e-17
SAMD9L	3.55067e-58	0.627984	0.729	0.034	7.67051e-54
ADGRL2	6.0408e-39	0.627206	0.868	0.256	1.30499e-34
VPS25	8.48998e-57	0.625641	0.814	0.103	1.83409e-52
HMOX1	5.78579e-29	0.624265	0.514	0.065	1.2499e-24
FAM129A	2.02092e-46	0.624108	0.849	0.172	4.3658e-42
CBX5	4.25015e-51	0.622735	0.927	0.244	9.18161e-47
ARHGEF2	1.73042e-36	0.622587	0.924	0.298	3.73822e-32
BNC2	7.79846e-37	0.620644	0.808	0.221	1.6847e-32
MED1	2.12533e-49	0.619683	0.792	0.118	4.59135e-45
PXN	5.19035e-34	0.618662	0.924	0.363	1.12127e-29
TRANK1	3.90122e-46	0.618609	0.719	0.076	8.4278e-42
GOPC	3.11487e-51	0.617915	0.716	0.061	6.72906e-47
CCT5	2.30965e-40	0.617516	0.918	0.29	4.98953e-36
PDE1A	2.24611e-47	0.617417	0.741	0.088	4.85226e-43
GOLGB1	1.00687e-35	0.61695	0.855	0.271	2.17513e-31
HGSNAT	5.09605e-47	0.615059	0.792	0.13	1.1009e-42
ARPC5	9.74194e-44	0.614275	0.899	0.256	2.10455e-39
ACVR2A	9.10498e-49	0.614187	0.662	0.034	1.96695e-44
TRIB3	3.96624e-35	0.613918	0.726	0.172	8.56827e-31
LEPROT	2.70349e-33	0.613263	0.943	0.393	5.84035e-29
SPDL1	6.86277e-41	0.612214	0.606	0.042	1.48256e-36
C7	1.60626e-27	0.611587	0.555	0.092	3.47001e-23
ANXA11	3.25212e-37	0.610056	0.886	0.298	7.02555e-33
FAM210B	1.04062e-48	0.609324	0.886	0.187	2.24805e-44
PRRC2B	1.24952e-40	0.608438	0.921	0.313	2.69935e-36
RHOBTB3	5.29904e-36	0.608408	0.934	0.351	1.14475e-31
EMP3	5.44201e-27	0.608112	0.968	0.576	1.17564e-22
DNAJA1	5.06277e-34	0.608075	0.931	0.355	1.09371e-29
MT-CO2	2.90051e-31	0.607852	1	1	6.26597e-27
USP22	5.10691e-33	0.60782	0.943	0.443	1.10324e-28
COL16A1	3.84093e-30	0.606388	0.896	0.344	8.29757e-26
TNFAIP2	5.92703e-41	0.60468	0.883	0.221	1.28042e-36
DIO2	8.99693e-17	0.602831	0.315	0.034	1.94361e-12
TRPS1	6.18188e-41	0.602726	0.795	0.179	1.33547e-36
SNX17	2.51104e-50	0.602553	0.864	0.176	5.4246e-46
ZNF652	2.50722e-41	0.601239	0.748	0.134	5.41635e-37
ADGRA2	1.03354e-33	0.600826	0.833	0.252	2.23275e-29
PTGIS	4.70266e-25	0.600756	0.943	0.431	1.01591e-20
RAB31	1.65128e-30	0.599927	0.956	0.42	3.56725e-26
NBN	2.40234e-49	0.599405	0.754	0.095	5.18978e-45
TIMMDC1	2.05163e-55	0.599292	0.849	0.122	4.43214e-51
CXCL12	2.44721e-31	0.598997	0.65	0.118	5.28672e-27
SETX	1.19264e-39	0.598941	0.792	0.172	2.57645e-35
PRICKLE2	1.60277e-51	0.597265	0.852	0.164	3.46247e-47
ALPK2	2.92099e-50	0.596716	0.691	0.046	6.31021e-46
BTF3L4	5.61574e-48	0.596678	0.842	0.153	1.21317e-43
SYNCRIP	1.53636e-37	0.596661	0.946	0.366	3.319e-33
PDE1C	1.60631e-30	0.595904	0.577	0.092	3.47011e-26
TBC1D5	4.12041e-50	0.595422	0.852	0.141	8.90132e-46
STAT6	6.50299e-39	0.595367	0.918	0.282	1.40484e-34
PSMA4	3.66697e-52	0.594956	0.871	0.153	7.92175e-48
FBN1	8.95148e-18	0.593613	0.994	0.615	1.93379e-13
MLXIP	1.44873e-34	0.5927	0.912	0.29	3.12969e-30
STC2	5.25199e-20	0.592215	0.997	0.676	1.13459e-15
STAT1	1.4094e-50	0.591176	0.905	0.183	3.04472e-46
LASP1	2.69439e-28	0.590817	0.946	0.427	5.82068e-24
TNFRSF11B	1.35778e-10	0.590411	0.416	0.145	2.93321e-06
TP53	2.18e-59	0.589621	0.792	0.057	4.70945e-55
TMEM43	9.49092e-47	0.589142	0.808	0.134	2.05032e-42
RAB10	4.68906e-43	0.587864	0.943	0.298	1.01298e-38
NFKBIZ	4.07197e-24	0.587394	0.946	0.45	8.79667e-20
SLFN5	1.91468e-48	0.586798	0.82	0.156	4.13629e-44
PSMA6	7.80786e-36	0.583971	0.886	0.309	1.68673e-31
C6orf89	8.70244e-43	0.583491	0.855	0.218	1.87999e-38
ATP2B4	4.77915e-31	0.58289	0.902	0.363	1.03244e-26
ZCCHC24	1.02308e-33	0.579242	0.896	0.298	2.21016e-29
FAM208A	3.25233e-46	0.578918	0.71	0.073	7.02601e-42
MAP1A	8.00079e-38	0.578157	0.931	0.317	1.72841e-33
TNPO1	1.3602e-24	0.578022	0.943	0.511	2.93843e-20
NOP56	2.64222e-45	0.577522	0.773	0.13	5.70798e-41
MT-CO1	3.69407e-26	0.577108	1	1	7.9803e-22
MDK	3.20677e-24	0.574863	0.987	0.775	6.92758e-20
SEPHS2	8.43606e-57	0.573496	0.754	0.05	1.82244e-52
CLTC	2.51378e-21	0.573311	0.991	0.641	5.43052e-17
SFPQ	6.49335e-39	0.572634	0.921	0.313	1.40276e-34
CHMP1B	3.01011e-41	0.571478	0.801	0.179	6.50274e-37
TNFAIP6	1.69206e-33	0.568837	0.902	0.313	3.65536e-29
CCT2	1.93093e-34	0.568829	0.883	0.302	4.17138e-30
EIF2S2	1.82341e-22	0.567835	0.962	0.504	3.93912e-18
PHLDA3	3.83077e-40	0.56765	0.855	0.218	8.2756e-36
HNRNPAB	1.09461e-41	0.567119	0.909	0.244	2.36468e-37
PPCS	1.10672e-48	0.565674	0.681	0.053	2.39084e-44
MDM2	1.0886e-36	0.565404	0.782	0.195	2.3517e-32
KCTD20	1.81005e-43	0.565292	0.798	0.156	3.91026e-39
ALDH9A1	3.06651e-35	0.564675	0.861	0.271	6.62459e-31
TRIP11	1.15815e-40	0.564059	0.773	0.16	2.50195e-36
RNF220	1.93989e-51	0.563581	0.697	0.042	4.19074e-47
POLR2F	6.86077e-49	0.562735	0.792	0.107	1.48213e-44
KGFLP2	2.71228e-50	0.560529	0.738	0.069	5.85934e-46
GADD45A	2.16711e-35	0.560451	0.779	0.183	4.6816e-31
SSC5D	1.44732e-32	0.559007	0.912	0.302	3.12665e-28
TRIP12	1.25381e-38	0.556939	0.849	0.233	2.7086e-34
SESN2	4.06998e-36	0.556696	0.814	0.225	8.79237e-32
HMCN1	1.19658e-39	0.556218	0.77	0.164	2.58497e-35
CREBBP	1.26726e-43	0.55465	0.804	0.172	2.73766e-39
RBFOX2	7.43044e-33	0.553044	0.927	0.389	1.6052e-28
PDHB	1.1043e-44	0.552952	0.751	0.122	2.38562e-40
FAM32A	8.6891e-49	0.550188	0.792	0.115	1.87711e-44
DPYSL3	2.28875e-36	0.549309	0.953	0.355	4.94438e-32
PCK2	2.51422e-40	0.548578	0.596	0.05	5.43147e-36
ZBTB38	3.77486e-31	0.548468	0.864	0.29	8.15483e-27
HNRNPR	1.46572e-34	0.547699	0.909	0.328	3.1664e-30
ZMYND11	8.13767e-42	0.547347	0.757	0.126	1.75798e-37
MXRA8	2.03877e-25	0.546434	0.959	0.519	4.40436e-21
KPNB1	2.04823e-19	0.545795	0.978	0.599	4.42479e-15
ZKSCAN1	2.37009e-40	0.542911	0.886	0.244	5.12011e-36
EFNA5	3.31972e-45	0.541412	0.618	0.031	7.17159e-41
RAB27B	1.74609e-38	0.540828	0.707	0.118	3.77207e-34
FAS	1.17733e-48	0.540156	0.76	0.111	2.5434e-44
PSMB8	5.10008e-41	0.53863	0.82	0.198	1.10177e-36
VEZF1	2.75898e-42	0.538584	0.868	0.229	5.96022e-38
OLFML3	3.33183e-27	0.538562	0.972	0.469	7.19774e-23
PHF14	3.61947e-51	0.538418	0.744	0.073	7.81914e-47
KLHDC3	8.59495e-39	0.538289	0.855	0.252	1.85677e-34
BCHE	1.57819e-40	0.538266	0.864	0.198	3.40937e-36
SMARCA4	1.35809e-44	0.538198	0.779	0.141	2.93389e-40
CTDSP1	1.20152e-48	0.537589	0.738	0.08	2.59564e-44
CREB3L1	4.56656e-26	0.537574	0.984	0.599	9.86513e-22
SLC7A1	2.60563e-40	0.53745	0.76	0.156	5.62893e-36
SVEP1	1.61275e-39	0.536782	0.719	0.122	3.48402e-35
MAPKAP1	6.32268e-46	0.536039	0.833	0.153	1.36589e-41
PTP4A2	1.73548e-19	0.535994	0.987	0.664	3.74915e-15
WDR82	2.15382e-36	0.535969	0.877	0.275	4.6529e-32
TPM1	7.79779e-25	0.535947	0.905	0.42	1.68456e-20
LOC105377105	4.78603e-37	0.533482	0.912	0.317	1.03393e-32
PPP3CA	2.30195e-33	0.533457	0.912	0.344	4.97291e-29
SYNE1	1.15443e-34	0.53337	0.823	0.26	2.49391e-30
UBE3A	2.19246e-35	0.53336	0.893	0.267	4.73638e-31
ATXN7L3B	7.79312e-42	0.533022	0.744	0.134	1.68355e-37
EPAS1	3.73571e-30	0.532732	0.937	0.408	8.07026e-26
PDE4DIP	1.73715e-30	0.532287	0.823	0.26	3.75276e-26
RNF213	8.01789e-34	0.532163	0.934	0.351	1.7321e-29
TADA3	2.17907e-40	0.53215	0.921	0.286	4.70745e-36
NFIB	3.10353e-42	0.531211	0.823	0.168	6.70455e-38
ANTXR2	4.87429e-28	0.530582	0.965	0.481	1.05299e-23
MCL1	9.10827e-23	0.528928	0.909	0.397	1.96766e-18
LOXL1	1.25166e-38	0.528796	0.845	0.191	2.70396e-34
XPO1	3.13374e-40	0.528324	0.877	0.267	6.76982e-36
LPP	9.42035e-25	0.527863	0.943	0.469	2.03508e-20
COMT	6.41714e-32	0.527682	0.94	0.37	1.3863e-27
KANK2	8.32347e-47	0.527587	0.861	0.168	1.79812e-42
CDH2	5.68423e-35	0.527554	0.804	0.214	1.22796e-30
SSB	6.62341e-42	0.527454	0.877	0.24	1.43086e-37
DTX3L	7.51223e-48	0.526662	0.672	0.05	1.62287e-43
ENC1	1.69183e-35	0.525777	0.565	0.061	3.65487e-31
EIF3J	6.65345e-50	0.525776	0.751	0.073	1.43735e-45
NCL	1.275e-32	0.524444	0.918	0.359	2.75439e-28
TOR1AIP1	5.10089e-47	0.523927	0.817	0.141	1.10194e-42
DYNLT1	3.77063e-41	0.523591	0.915	0.267	8.14569e-37
GLT8D2	2.70651e-37	0.523067	0.849	0.214	5.84687e-33
ARHGAP1	7.63135e-39	0.522933	0.915	0.271	1.6486e-34
PDGFRB	1.95371e-31	0.520551	0.896	0.321	4.2206e-27
HGF	1.63939e-12	0.520321	0.909	0.508	3.54157e-08
PSMB6	7.44601e-35	0.52022	0.893	0.275	1.60856e-30
ATP2A2	3.37247e-31	0.519027	0.89	0.328	7.28555e-27
MLLT1	3.21729e-32	0.518904	0.877	0.294	6.95031e-28
XAF1	2.81896e-27	0.51848	0.909	0.393	6.0898e-23
CSNK1A1	4.60412e-30	0.518168	0.909	0.34	9.94628e-26
LURAP1L	4.87334e-47	0.517972	0.729	0.092	1.05279e-42
TMEM127	3.32251e-52	0.517842	0.814	0.099	7.17763e-48
HNRNPK	1.23356e-23	0.516279	0.972	0.576	2.66487e-19
CAMK2D	1.45223e-31	0.515657	0.861	0.294	3.13724e-27
PPP1R11	5.82381e-42	0.515356	0.773	0.149	1.25812e-37
VCAM1	2.23749e-41	0.51519	0.584	0.031	4.83364e-37
XPOT	1.19437e-33	0.515125	0.899	0.317	2.58019e-29
ANKRD17	9.62823e-39	0.513534	0.814	0.202	2.07999e-34
HSPD1	1.36666e-32	0.512961	0.902	0.321	2.95241e-28
SAMD9	9.42235e-53	0.512922	0.785	0.088	2.03551e-48
TWIST2	6.64655e-37	0.512159	0.77	0.179	1.43585e-32
MEIS1	1.5382e-31	0.51214	0.845	0.275	3.32297e-27
HS2ST1	8.05908e-38	0.511709	0.792	0.168	1.741e-33
TNRC6B	7.12298e-40	0.511705	0.789	0.179	1.53878e-35
PHLDB1	7.37359e-46	0.511493	0.76	0.107	1.59292e-41
GPATCH8	4.15251e-45	0.511431	0.732	0.107	8.97067e-41
PYCR1	1.36095e-30	0.51112	0.842	0.271	2.94005e-26
PSMC2	2.96359e-40	0.510343	0.798	0.183	6.40225e-36
ROBO1	4.03446e-37	0.50949	0.89	0.275	8.71565e-33
ABHD4	3.81692e-37	0.508624	0.883	0.252	8.2457e-33
CCL7	3.4399e-16	0.508061	0.252	0.011	7.43122e-12
HUWE1	1.9481e-40	0.507785	0.899	0.267	4.20848e-36
MARVELD1	5.46824e-49	0.50762	0.782	0.099	1.1813e-44
DECR1	2.7283e-41	0.506792	0.798	0.149	5.89395e-37
SLC35A4	4.3575e-45	0.504654	0.65	0.053	9.41351e-41
TMEM106B	6.31418e-38	0.504407	0.877	0.244	1.36405e-33
JADE1	2.6505e-46	0.504159	0.675	0.061	5.72587e-42
SPRED1	2.50311e-40	0.503968	0.722	0.122	5.40746e-36
EI24	4.3268e-36	0.502886	0.868	0.275	9.34718e-32
TIMM8B	4.37392e-49	0.502631	0.707	0.057	9.44898e-45
MAT2B	5.42372e-40	0.502156	0.795	0.179	1.17169e-35
NUCKS1	5.49592e-29	0.501894	0.978	0.573	1.18728e-24
SYT1	6.92819e-43	0.501481	0.713	0.095	1.4967e-38
KCNMA1	8.84173e-34	0.501114	0.912	0.321	1.91008e-29
SLC38A10	1.10895e-36	0.501012	0.858	0.252	2.39566e-32
MRPL3	9.20498e-48	0.500939	0.817	0.145	1.98855e-43
ANGPTL1	2.27652e-50	0.500907	0.669	0.031	4.91797e-46
CTDSP2	3.42086e-34	0.50087	0.905	0.317	7.39008e-30
DNAJC10	2.67549e-31	0.500865	0.877	0.298	5.77986e-27
ZC3HAV1	1.8806e-43	0.500434	0.855	0.195	4.06267e-39
DBI	0.000329411	-0.50022	0.795	0.439	1
SERPING1	0.199808	-0.50316	0.259	0.176	1
FSTL3	0.434798	-0.503698	0.489	0.385	1
UBE2R2	0.972992	-0.503814	0.858	0.531	1
MIR100HG	0.820922	-0.504915	0.719	0.45	1
CLEC2B	0.788258	-0.508941	0.322	0.244	1
INHBA	0.0864861	-0.512986	0.902	0.565	1
ELL2	0.859883	-0.513552	0.836	0.519	1
RHOA	0.00069412	-0.514497	0.978	0.786	1
RPL29	8.2278e-06	-0.514605	0.984	0.844	0.177745
CLK3	0.265814	-0.514953	0.454	0.363	1
SMAP1	0.816695	-0.51716	0.558	0.374	1
RPS27	2.88148e-08	-0.518232	0.994	0.927	0.000622487
NGLY1	0.237827	-0.520052	0.353	0.309	1
RPL37	1.26809e-11	-0.523576	1	0.943	2.73945e-07
SNX3	0.00269051	-0.523869	0.962	0.702	1
RPS29	0.000722206	-0.524309	0.994	0.885	1
NUP58	0.809208	-0.524372	0.454	0.324	1
RPL30	1.10747e-07	-0.524768	0.997	0.927	0.00239246
PTGS1	0.819784	-0.525567	0.562	0.42	1
RNASE4	0.085632	-0.525775	0.338	0.321	1
FAM210A	0.211955	-0.525972	0.344	0.309	1
MGEA5	0.213225	-0.526358	0.659	0.393	1
RPL17	2.85338e-08	-0.526395	0.994	0.859	0.000616415
PTTG1IP	0.795356	-0.527512	0.924	0.645	1
GOLGA4	0.601173	-0.528423	0.902	0.523	1
SRSF1	0.0550038	-0.528637	0.833	0.477	1
TSPAN13	4.78453e-08	-0.530999	0.117	0.275	0.0010336
ESRG	0.0244941	-0.531736	0.322	0.34	1
SPOCK1	0.17718	-0.531863	0.959	0.691	1
OSMR	0.491599	-0.533936	0.849	0.511	1
RBPMS	0.521383	-0.537564	0.893	0.557	1
TGFB1	0.417496	-0.537927	0.659	0.462	1
FGFR1OP2	0.412395	-0.538076	0.533	0.355	1
SEC24A	0.117391	-0.539229	0.442	0.374	1
RPS28	7.44996e-07	-0.539469	0.981	0.844	0.0160941
RPL12	2.81354e-07	-0.541169	0.994	0.885	0.00607809
LRRC32	7.68379e-05	-0.541291	0.751	0.37	1
BTG1	0.298812	-0.541316	0.864	0.531	1
DAP	0.0269761	-0.541771	0.934	0.676	1
RCN3	0.271901	-0.541999	0.896	0.607	1
MYO10	0.428027	-0.542002	0.618	0.397	1
RPL23A	4.22517e-08	-0.542855	1	0.908	0.000912763
RAB11FIP5	0.89434	-0.544192	0.558	0.382	1
RAC2	0.921006	-0.547844	0.555	0.397	1
VAMP2	0.156197	-0.548554	0.883	0.538	1
C16orf13	0.608656	-0.550577	0.713	0.477	1
KIF1C	0.0026493	-0.550726	0.672	0.359	1
EIF4H	0.364441	-0.550876	0.965	0.584	1
HLA-C	6.18391e-05	-0.551924	0.994	0.828	1
HMGA2	0.00377006	-0.55483	0.249	0.298	1
GOLT1B	0.435605	-0.555579	0.779	0.511	1
EIF1	1.09232e-06	-0.555811	1	0.908	0.0235974
PEA15	0.795072	-0.556241	0.921	0.603	1
HSD11B1	0.71492	-0.556637	0.42	0.336	1
ABL2	0.00475451	-0.556651	0.703	0.385	1
PALLD	0.00816547	-0.557091	0.912	0.565	1
TUBA4A	5.46905e-05	-0.557251	0.199	0.294	1
RNF126	0.152897	-0.560029	0.366	0.324	1
SRP54	0.375787	-0.560924	0.688	0.427	1
ECM1	0.0025425	-0.561504	0.921	0.656	1
FXYD5	0.30999	-0.561638	0.858	0.58	1
PFKP	0.095515	-0.562144	0.479	0.408	1
CEMIP	0.0324241	-0.562447	0.315	0.344	1
AP3S1	0.32235	-0.564666	0.88	0.595	1
PATL1	0.0262322	-0.565269	0.833	0.492	1
SIAH2	0.314616	-0.565917	0.41	0.34	1
RPS21	3.26065e-06	-0.566139	0.972	0.802	0.0704399
TAGLN	0.0760337	-0.566753	0.656	0.454	1
MICA	0.000476994	-0.568888	0.274	0.332	1
FAM13A	0.497886	-0.569838	0.413	0.328	1
MT-TI	0.561699	-0.56991	0.505	0.37	1
CNOT8	0.70848	-0.570109	0.467	0.347	1
CCNI	0.000814568	-0.571239	0.959	0.702	1
ZBTB43	0.465242	-0.571923	0.413	0.332	1
MT-TL1	0.405954	-0.573906	0.492	0.393	1
TWSG1	0.375538	-0.574074	0.909	0.634	1
MAP1LC3B	0.514583	-0.574713	0.937	0.634	1
TPT1	1.26739e-13	-0.575154	1	0.992	2.73795e-09
KDELR1	0.00818279	-0.576176	0.94	0.634	1
CRADD	0.00293808	-0.576612	0.189	0.252	1
IL32	0.575454	-0.578456	0.435	0.34	1
PNISR	0.501789	-0.579438	0.909	0.538	1
GSDMB	0.00199886	-0.57997	0.268	0.321	1
COX8A	0.226906	-0.580698	0.953	0.634	1
BAZ2A	0.689867	-0.581054	0.691	0.458	1
HIST1H1C	0.57299	-0.581231	0.517	0.374	1
RPL27A	6.01517e-13	-0.582393	0.997	0.916	1.29946e-08
MAP2K1	0.566217	-0.583988	0.681	0.427	1
RPL35A	2.87551e-06	-0.586362	0.991	0.87	0.0621195
FAM219A	0.0489538	-0.587334	0.315	0.313	1
CSRNP1	0.0858903	-0.590942	0.306	0.302	1
EIF1B	0.355321	-0.591195	0.697	0.427	1
UCA1	2.35962e-06	-0.59129	0.221	0.34	0.0509749
RPL32	4.80344e-07	-0.593705	1	0.901	0.0103769
RPS9	6.57262e-07	-0.593841	0.991	0.817	0.0141988
BTG3	0.104736	-0.59709	0.546	0.431	1
RICTOR	0.890829	-0.598186	0.508	0.355	1
MT-TM	0.742691	-0.603812	0.58	0.405	1
SEC61G	0.00462565	-0.603872	0.899	0.645	1
RPL36	1.4931e-06	-0.604949	0.984	0.855	0.0322555
GDI1	0.212252	-0.604994	0.826	0.542	1
COL4A1	0.296741	-0.605666	0.836	0.515	1
HLA-B	0.000142589	-0.606288	0.984	0.798	1
TPM2	0.00443294	-0.607768	0.962	0.782	1
PIM3	0.0387491	-0.609411	0.322	0.324	1
TAF1D	0.392182	-0.612603	0.549	0.412	1
CALU	2.94148e-09	-0.612871	0.997	0.889	6.35448e-05
CYP51A1	0.430997	-0.61646	0.751	0.466	1
IFRD1	0.708018	-0.618787	0.615	0.42	1
SLC6A8	0.00273315	-0.618984	0.312	0.344	1
RAB8B	0.284464	-0.624214	0.612	0.385	1
FKBP1A	1.36168e-05	-0.624634	0.953	0.603	0.294165
RPS15	4.00618e-11	-0.62487	1	0.893	8.65454e-07
FER1L4	1.0999e-08	-0.625066	0.11	0.271	0.000237612
FAM63B	0.693463	-0.628415	0.558	0.401	1
IDI1	0.0779552	-0.629063	0.568	0.347	1
RPL35	1.80685e-07	-0.629179	0.984	0.836	0.00390334
BASP1	0.485266	-0.633989	0.909	0.58	1
PAG1	0.460481	-0.634032	0.366	0.305	1
IMPAD1	0.0107738	-0.634384	0.896	0.63	1
NT5E	0.390775	-0.635332	0.571	0.389	1
C11orf96	0.0105435	-0.637383	0.927	0.557	1
GPRC5A	0.0185986	-0.637421	0.211	0.252	1
UBR4	0.773733	-0.637965	0.839	0.5	1
KCNE4	8.14747e-05	-0.639613	0.808	0.405	1
INSIG2	0.00329149	-0.639649	0.278	0.317	1
SEPW1	0.913607	-0.640831	0.817	0.565	1
C4orf3	0.810236	-0.641494	0.855	0.546	1
COL12A1	0.330925	-0.64327	0.937	0.622	1
WSB1	0.122895	-0.646528	0.864	0.489	1
FDFT1	0.862201	-0.64681	0.678	0.458	1
EDIL3	0.517847	-0.647481	0.644	0.447	1
TFF2	5.01118e-16	-0.651168	0.063	0.313	1.08256e-11
BTAF1	0.600951	-0.651894	0.479	0.355	1
KRT8	0.0122614	-0.652921	0.467	0.42	1
MYO9B	0.992548	-0.654965	0.694	0.439	1
PTPRF	0.0185563	-0.658086	0.438	0.393	1
GNAS	3.50657e-18	-0.662982	1	0.977	7.57525e-14
SMTN	0.0711026	-0.664748	0.397	0.351	1
DCLK2	1.54229e-05	-0.666593	0.148	0.26	0.33318
FLJ44635	3.25212e-09	-0.667113	0.962	0.809	7.02555e-05
RPL39	2.78595e-07	-0.669568	0.987	0.84	0.00601849
TMED9	0.0186772	-0.67029	0.896	0.595	1
ATP1B3	0.219974	-0.670683	0.842	0.58	1
CYGB	0.246523	-0.671591	0.871	0.603	1
SOD3	0.00365485	-0.671755	0.959	0.718	1
SNHG12	0.459555	-0.673041	0.426	0.344	1
HMGCS1	0.62354	-0.673891	0.36	0.263	1
CHCHD2	0.000402952	-0.674042	0.956	0.771	1
FKBP10	0.00255381	-0.674698	0.912	0.637	1
KDELR3	0.407238	-0.675611	0.839	0.523	1
APLP2	1.08453e-12	-0.676812	0.991	0.786	2.34292e-08
STARD4	0.218137	-0.678945	0.539	0.408	1
JMJD6	0.00251437	-0.680375	0.375	0.378	1
BCL6	0.736915	-0.68588	0.552	0.389	1
SDC2	0.649194	-0.687605	0.713	0.481	1
COPS2	0.957797	-0.688161	0.845	0.511	1
PKM	1.21768e-07	-0.691715	1	0.973	0.00263056
PFN1	6.44118e-10	-0.692267	1	0.973	1.39149e-05
RPS11	1.1603e-15	-0.692295	0.994	0.939	2.5066e-11
LRRFIP1	0.479619	-0.692567	0.931	0.592	1
RPL37A	1.10347e-15	-0.697512	0.997	0.95	2.38382e-11
SLC5A3	0.857924	-0.705022	0.517	0.363	1
MFAP5	0.000276067	-0.706786	0.205	0.294	1
TOMM7	0.01554	-0.711775	0.877	0.626	1
PPP1R18	0.493415	-0.715425	0.893	0.546	1
HLA-E	0.00234337	-0.721275	0.921	0.63	1
IGFBP7	2.37326e-10	-0.727627	1	0.943	5.12696e-06
SLC16A3	0.5641	-0.730817	0.71	0.42	1
ARPC1B	2.03425e-09	-0.73264	0.902	0.481	4.39458e-05
UBA52	1.76501e-07	-0.737134	0.984	0.832	0.00381296
CD55	0.135456	-0.737239	0.656	0.489	1
TFF3	7.86935e-29	-0.744582	0.016	0.366	1.70002e-24
HLA-A	1.28801e-10	-0.749181	0.997	0.882	2.78248e-06
SNHG7	0.114169	-0.750874	0.757	0.508	1
OST4	6.32656e-08	-0.752525	0.968	0.763	0.00136673
ADAM9	0.026024	-0.75617	0.785	0.557	1
RPL18A	3.19027e-15	-0.75885	1	0.954	6.89194e-11
S100A4	8.68717e-15	-0.765327	0.12	0.359	1.87669e-10
BRI3	0.0013697	-0.768024	0.931	0.641	1
CSTB	0.122898	-0.768208	0.927	0.634	1
CAMK2N1	0.49923	-0.76866	0.524	0.389	1
MYDGF	1.7641e-06	-0.774726	0.912	0.691	0.03811
TBX3	0.772473	-0.776448	0.656	0.412	1
PHF1	0.0840901	-0.779252	0.631	0.458	1
RND3	0.725015	-0.781669	0.94	0.565	1
KCMF1	0.769242	-0.78287	0.707	0.447	1
CST3	2.47088e-06	-0.783476	0.994	0.863	0.0533785
SQLE	0.477339	-0.786005	0.479	0.374	1
PRELP	0.421549	-0.788295	0.599	0.385	1
CLK1	0.0127056	-0.788584	0.435	0.397	1
MAFG	0.398625	-0.789147	0.839	0.473	1
PHLDA2	0.515358	-0.792949	0.511	0.351	1
MASP1	0.25946	-0.794328	0.738	0.427	1
CRIP2	0.0901427	-0.796047	0.546	0.439	1
GUK1	0.00815889	-0.797478	0.858	0.599	1
PDK1	1.42197e-10	-0.797872	0.174	0.355	3.07189e-06
SERF2	3.50921e-09	-0.798338	1	0.931	7.58095e-05
BCAR1	0.482198	-0.811981	0.533	0.382	1
NINJ1	0.368029	-0.817291	0.467	0.366	1
C3orf58	0.133225	-0.819561	0.505	0.408	1
RYBP	0.435214	-0.820081	0.637	0.408	1
MMP24-AS1	0.149496	-0.822229	0.726	0.523	1
PFKFB3	6.09885e-05	-0.826193	0.202	0.298	1
LDLR	0.49911	-0.827932	0.634	0.416	1
PLAU	4.52767e-06	-0.828601	0.558	0.282	0.0978112
VDAC1	1.83599e-05	-0.833171	0.918	0.66	0.396628
GJA1	0.257837	-0.833213	0.659	0.477	1
METRNL	0.2507	-0.834432	0.669	0.466	1
LINC-PINT	0.00112187	-0.835323	0.338	0.366	1
SMS	0.0251466	-0.84033	0.735	0.523	1
GBE1	0.230956	-0.840862	0.763	0.508	1
POFUT2	0.000932153	-0.843491	0.517	0.45	1
PEG10	0.317967	-0.844681	0.634	0.408	1
PLOD1	0.000660671	-0.848433	0.877	0.611	1
RPLP2	7.30167e-23	-0.850307	0.994	0.908	1.57738e-18
RNF145	0.385513	-0.851307	0.681	0.45	1
F3	0.0104713	-0.851498	0.35	0.351	1
VDAC2	0.000806414	-0.852298	0.842	0.618	1
MGLL	0.000513598	-0.852834	0.319	0.363	1
MXI1	0.0815653	-0.855537	0.716	0.504	1
GPI	0.000510142	-0.858021	0.789	0.573	1
MYADM	0.10954	-0.861472	0.722	0.504	1
CTSB	4.10866e-16	-0.861823	0.984	0.836	8.87594e-12
PFDN5	9.77577e-09	-0.866262	0.905	0.676	0.000211186
S100A6	2.81867e-07	-0.868526	0.994	0.935	0.00608918
P4HA2	0.0547234	-0.875124	0.852	0.553	1
NEAT1	0.61674	-0.875868	0.994	0.836	1
CD44	7.15406e-12	-0.878063	0.975	0.798	1.54549e-07
SLC2A1	4.17123e-11	-0.879062	0.186	0.374	9.01111e-07
BNIP3L	9.47398e-10	-0.885549	0.978	0.763	2.04666e-05
MSANTD3	0.01289	-0.8859	0.628	0.481	1
MT1L	2.36575e-07	-0.886502	0.224	0.359	0.00511074
MME	0.00262368	-0.899744	0.467	0.443	1
CYB5R3	0.876409	-0.905204	0.94	0.649	1
CRABP2	0.017655	-0.909069	0.659	0.523	1
MYL9	0.233927	-0.910039	0.849	0.58	1
PGAM1	6.97947e-05	-0.916126	0.76	0.599	1
SLC6A6	3.24767e-11	-0.918207	0.155	0.347	7.01595e-07
RPL28	7.44113e-19	-0.924027	0.997	0.905	1.60751e-14
HK2	0.00012191	-0.927907	0.312	0.374	1
TPI1	1.59882e-10	-0.929802	0.956	0.733	3.45393e-06
TMSB4X	2.84142e-14	-0.937314	0.994	0.931	6.13832e-10
ALKBH5	0.00303483	-0.937763	0.808	0.557	1
TWIST1	0.522613	-0.940752	0.634	0.424	1
IGFBP6	4.34575e-07	-0.959859	0.934	0.729	0.00938812
MRPS6	0.614347	-0.961775	0.618	0.431	1
DKK3	4.8309e-09	-0.963187	0.921	0.71	0.000104362
UGCG	0.686573	-0.966286	0.817	0.504	1
DDIT4	0.0113419	-0.970647	0.792	0.45	1
MXRA7	1.20171e-09	-0.972823	0.95	0.782	2.59606e-05
P4HB	5.97858e-21	-0.988289	0.991	0.885	1.29155e-16
TGFBI	5.29632e-09	-0.991385	0.978	0.824	0.000114416
MT-TV	2.47693e-07	-0.99587	0.3	0.408	0.0053509
COL4A2	0.00361364	-1.01389	0.934	0.637	1
ERRFI1	0.964975	-1.03013	0.495	0.355	1
CD9	1.54183e-05	-1.03181	0.685	0.576	0.333081
SPINT2	2.47092e-23	-1.03568	0.126	0.454	5.33794e-19
MAFF	4.17941e-05	-1.07446	0.527	0.496	0.902878
C12orf75	0.046503	-1.07909	0.836	0.603	1
PERP	4.41611e-08	-1.08055	0.609	0.569	0.000954012
ITGB1	3.54975e-20	-1.10256	1	0.95	7.66852e-16
CKS2	0.000768942	-1.10434	0.306	0.347	1
LOXL2	0.00402838	-1.12286	0.94	0.634	1
LMAN1	2.08732e-09	-1.13853	0.978	0.691	4.50924e-05
NR1D1	0.00078885	-1.15749	0.533	0.469	1
LYZ	4.95148e-33	-1.17612	0.041	0.447	1.06967e-28
LDHA	1.29426e-08	-1.18832	0.987	0.737	0.000279599
RBPJ	0.04573	-1.20157	0.864	0.561	1
MALAT1	0.0919402	-1.22678	1	0.958	1
VIM	7.75815e-30	-1.23542	1	0.958	1.67599e-25
S100A10	7.57163e-13	-1.23924	0.946	0.76	1.6357e-08
RAB3B	9.08506e-13	-1.25439	0.338	0.492	1.96265e-08
CA12	0.211401	-1.25689	0.814	0.538	1
TINAGL1	8.4354e-16	-1.27862	0.224	0.458	1.8223e-11
WDR45B	0.000497359	-1.28966	0.842	0.569	1
PLAUR	1.71178e-06	-1.29398	0.814	0.637	0.0369795
TM4SF1	0.000589252	-1.30125	0.662	0.531	1
GSN-AS1	1.81349e-15	-1.3056	0.054	0.282	3.91768e-11
PTGS2	0.146974	-1.3061	0.609	0.477	1
PPDPF	3.36485e-19	-1.32137	0.959	0.809	7.26908e-15
MT-RNR2	9.55827e-44	-1.33377	1	1	2.06487e-39
P4HA1	1.19485e-09	-1.33907	0.839	0.641	2.58122e-05
TMSB10	2.59386e-31	-1.34635	1	0.954	5.60351e-27
PLOD2	3.12969e-09	-1.35014	0.94	0.714	6.76106e-05
SH3BGRL3	8.30413e-07	-1.37133	1	0.92	0.0179394
LGALS1	2.18483e-31	-1.39352	1	0.927	4.71988e-27
HHLA2	5.98801e-27	-1.4079	0.221	0.557	1.29359e-22
ALDOC	2.93535e-22	-1.43509	0.148	0.458	6.34124e-18
TMEM158	1.66126e-19	-1.45162	0.899	0.84	3.58882e-15
PGK1	1.23147e-14	-1.45703	0.905	0.71	2.66035e-10
ATP13A3	1.25859e-06	-1.4885	0.855	0.618	0.0271892
VKORC1	9.23087e-18	-1.5643	0.927	0.74	1.99415e-13
FAM162A	7.27232e-09	-1.62278	0.543	0.531	0.000157104
SLC2A3	4.46816e-08	-1.65506	0.379	0.45	0.000965256
MSMO1	1.29337e-06	-1.66016	0.656	0.553	0.0279406
MT-RNR1	4.49296e-45	-1.73214	1	0.996	9.70614e-41
SCD	1.72505e-13	-1.79769	0.855	0.683	3.72662e-09
CXCL8	0.834194	-1.82229	0.776	0.565	1
LINC01057	4.02736e-36	-1.86182	0.445	0.718	8.7003e-32
INSIG1	1.58868e-09	-1.86241	0.486	0.527	3.43203e-05
BNIP3	4.57842e-11	-1.86383	0.744	0.618	9.89077e-07
HMGA1	3.9885e-21	-1.90118	0.707	0.725	8.61637e-17
MT2A	2.65625e-19	-1.94995	0.987	0.866	5.7383e-15
TIMP3	6.54067e-08	-1.98399	0.457	0.504	0.00141298
SERPINE1	4.49064e-13	-2.00654	0.899	0.725	9.70112e-09
IER3	0.0235608	-2.02347	0.946	0.641	1
NDRG1	7.89523e-09	-2.02537	0.669	0.573	0.000170561
ALDOA	1.52639e-32	-2.0399	0.965	0.824	3.29745e-28
SFRP1	8.20643e-11	-2.05056	0.877	0.729	1.77283e-06
TFPI2	4.5683e-24	-2.22149	0.997	0.908	9.86889e-20
VEGFA	3.95032e-09	-2.22474	0.915	0.66	8.53387e-05
CCND1	0.00110058	-2.25491	0.722	0.58	1
NPTX1	8.86993e-20	-2.30437	0.025	0.286	1.91617e-15
MMP1	3.57128e-18	-2.31919	0.722	0.744	7.71503e-14
LOX	6.34503e-13	-2.3404	0.934	0.718	1.37072e-08
BHLHE40	5.11303e-17	-2.40667	0.344	0.534	1.10457e-12
TIMP1	1.3377e-46	-2.4661	1	0.973	2.88984e-42
ADM	4.38953e-07	-2.49851	0.479	0.504	0.0094827
HILPDA	7.92465e-16	-2.77557	0.259	0.473	1.71196e-11
ERO1A	8.32978e-16	-2.79168	0.688	0.637	1.79948e-11
STC1	5.4932e-13	-2.80879	0.256	0.469	1.1867e-08
GAPDH	2.52864e-56	-2.83159	1	0.977	5.46262e-52
ENO2	2.81428e-31	-3.02358	0.287	0.618	6.07969e-27
CEP152	5.1355e-08	-3.48403	0.65	0.584	0.00110942

## Sheet: DEG Cluster5 caf
GENES	p_val	avg_log2FC	pct.1	pct.2	p_val_adj
CCND1	0.0118359	2.72724	0.532	0.692	1
SH3BGRL3	2.36436e-20	2.09049	0.911	0.978	5.10772e-16
HMGA1	6.72078e-07	1.82071	0.629	0.738	0.0145189
MYL9	6.80807e-05	1.74127	0.605	0.76	1
ARPC1B	0.0082078	1.72651	0.54	0.758	1
SFRP1	0.178026	1.68067	0.581	0.873	1
TFPI2	1.73013e-06	1.63751	0.823	0.993	0.0373759
FKBP1A	2.76514e-08	1.57876	0.677	0.826	0.000597353
CYB5R3	3.78365e-07	1.56373	0.653	0.851	0.00817383
C12orf75	0.000605595	1.54842	0.573	0.774	1
PLAU	0.280806	1.48372	0.298	0.47	1
TAGLN	0.000185178	1.48031	0.548	0.569	1
S100A6	1.83011e-14	1.36797	0.895	0.987	3.95359e-10
CFL1	2.85181e-23	1.27911	0.911	0.967	6.16076e-19
TIMP1	1.901e-06	1.23831	0.944	1	0.0410673
DBI	0.00555314	1.21545	0.516	0.666	1
CAPNS1	1.08838e-11	1.21382	0.798	0.897	2.35123e-07
PHLDA2	0.370222	1.19868	0.355	0.462	1
MAP1B	0.585811	1.17671	0.589	0.864	1
ACTB	1.10657e-09	1.16348	0.919	0.96	2.39053e-05
S100A11	6.79379e-09	1.15448	0.815	0.971	0.000146766
SERF2	4.83281e-14	1.14995	0.879	0.993	1.04403e-09
PTMS	2.46973e-06	1.09894	0.702	0.897	0.0533537
MXRA7	1.31214e-05	1.09229	0.694	0.923	0.283461
PKM	4.84659e-13	1.08649	0.952	0.998	1.04701e-08
PTPN11	0.107201	1.06776	0.387	0.752	1
S100A10	0.290837	1.06409	0.605	0.932	1
CDK2AP1	1.65511e-05	1.05058	0.677	0.888	0.357552
PPDPF	0.00332961	1.04353	0.677	0.949	1
MT2A	0.00979958	1.02625	0.766	0.978	1
PRKCDBP	0.683507	1.0217	0.403	0.655	1
TIMP3	0.0373935	1.01393	0.298	0.527	1
PALLD	0.0228883	0.983563	0.435	0.842	1
COX8A	0.091779	0.978942	0.573	0.873	1
HSPB6	5.19572e-15	0.95695	0.992	0.985	1.12243e-10
MEDAG	0.0928522	0.943526	0.29	0.492	1
OAZ1	3.96184e-10	0.937132	0.839	0.958	8.55877e-06
RAB13	0.903839	0.931435	0.532	0.853	1
AES	0.0333492	0.92793	0.589	0.89	1
SPTBN1	0.946602	0.922604	0.524	0.848	1
TPM2	0.000586088	0.922129	0.669	0.938	1
ANXA2	0.115022	0.919752	0.653	0.925	1
MYL12A	0.140549	0.917005	0.565	0.837	1
YBX1	3.24306e-05	0.914258	0.75	0.934	0.700598
CST3	0.00102516	0.904863	0.774	0.978	1
LRRC75A-AS1	4.36816e-11	0.904095	0.815	0.945	9.43655e-07
TAGLN2	0.90032	0.897106	0.516	0.833	1
MYL12B	6.00991e-06	0.896813	0.669	0.877	0.129832
CRIP2	0.2987	0.89473	0.331	0.543	1
MAP4	0.289211	0.894364	0.516	0.881	1
MT-RNR1	2.11681e-07	0.876559	0.992	1	0.00457295
MMP24-AS1	0.0514812	0.87619	0.363	0.708	1
NDUFA4	0.199495	0.869246	0.548	0.829	1
PPIA	8.34079e-09	0.868236	0.911	0.985	0.000180186
GUK1	0.597415	0.862465	0.5	0.807	1
SCARA3	0.84617	0.85978	0.452	0.705	1
UBA52	5.48206e-07	0.85975	0.734	0.965	0.0118429
COX6A1	0.000180405	0.85436	0.702	0.934	1
SEPW1	0.667514	0.853492	0.444	0.774	1
LGALS1	5.56931e-06	0.84882	0.847	1	0.120314
CSRP1	0.950158	0.848673	0.492	0.774	1
ANXA6	0.446494	0.835301	0.468	0.782	1
CAPN2	0.070507	0.834044	0.605	0.888	1
PRDX3	0.734987	0.833845	0.444	0.664	1
MFAP5	0.195907	0.829892	0.25	0.244	1
TPM4	2.64682e-05	0.829773	0.823	0.956	0.571792
THY1	0.0444009	0.829074	0.621	0.853	1
KIF1C	0.0279435	0.823322	0.306	0.591	1
RPL28	6.04996e-08	0.822937	0.823	0.991	0.00130697
RPS17	1.94307e-08	0.817778	0.75	0.963	0.000419761
RPL41	5.96462e-18	0.816853	0.984	0.998	1.28854e-13
DSTN	0.142309	0.814897	0.597	0.877	1
MGLL	0.086845	0.810674	0.218	0.371	1
RPS19	4.13196e-08	0.805057	0.847	0.987	0.000892628
RPS29	3.89264e-08	0.802865	0.806	0.982	0.000840927
RPL37A	1.89882e-15	0.801954	0.903	0.996	4.10201e-11
TMSB4X	0.000317661	0.795544	0.871	0.991	1
CHCHD2	0.00712577	0.794703	0.669	0.927	1
CAPN1	0.00697222	0.794586	0.274	0.567	1
RPS12	6.92076e-10	0.790296	0.879	0.98	1.49509e-05
VIM	0.000278077	0.788761	0.911	1	1
TSPO	0.0714436	0.785669	0.403	0.769	1
C9orf16	0.17613	0.783217	0.387	0.71	1
UBE2S	9.71232e-09	0.772411	0.129	0.49	0.000209815
TPM3	0.148964	0.771888	0.435	0.796	1
PRSS23	0.554489	0.771709	0.508	0.741	1
IL33	0.0750767	0.765608	0.371	0.609	1
RPS10	0.620938	0.765279	0.468	0.815	1
RPL36	1.80029e-08	0.76365	0.79	0.963	0.000388916
RPLP2	9.67426e-11	0.760632	0.815	0.993	2.08993e-06
RPL18A	3.96959e-07	0.759473	0.911	0.998	0.00857551
CKS1B	0.00389634	0.757096	0.194	0.418	1
RPLP1	8.34129e-14	0.753757	0.927	0.993	1.80197e-09
RPL39	2.51367e-06	0.744804	0.75	0.967	0.0543027
RHOA	0.000563106	0.742499	0.694	0.945	1
IFITM2	0.000105649	0.737437	0.782	0.947	1
UBB	0.0145288	0.735956	0.677	0.938	1
DAP	0.0793342	0.734056	0.581	0.881	1
NEK7	0.00319728	0.73283	0.347	0.719	1
UCHL1	0.0435784	0.730922	0.645	0.837	1
CALM3	0.0523224	0.72821	0.363	0.692	1
RPL26	3.20068e-10	0.726715	0.855	0.985	6.91443e-06
MAP1LC3B	0.865297	0.726038	0.524	0.875	1
PTRF	0.0420438	0.71953	0.46	0.87	1
STMN1	2.43483e-06	0.716408	0.185	0.53	0.0525997
HINT1	0.173072	0.710875	0.565	0.822	1
RPL35	0.000775105	0.710822	0.694	0.978	1
TMEM158	0.0165891	0.709644	0.718	0.914	1
EEF1G	2.82587e-05	0.706451	0.782	0.967	0.610474
MT-RNR2	1.3444e-09	0.70448	1	1	2.90431e-05
RPS9	3.87684e-05	0.703487	0.685	0.974	0.837514
RPS15	9.22609e-07	0.703348	0.823	0.987	0.0199311
PERP	0.119907	0.700377	0.371	0.651	1
CMPK1	0.0100481	0.695064	0.363	0.738	1
MMP1	0.27845	0.690475	0.589	0.771	1
SERINC2	0.147454	0.687567	0.234	0.393	1
RSU1	0.158149	0.686441	0.403	0.699	1
RPL32	1.7033e-05	0.684631	0.806	0.996	0.367965
RPS28	4.90786e-06	0.682635	0.766	0.96	0.106024
UQCR11	0.894267	0.680267	0.444	0.732	1
TXN	0.909338	0.673845	0.548	0.895	1
TM7SF3	0.0351234	0.670283	0.29	0.552	1
CD59	0.300757	0.667613	0.629	0.923	1
FAM129B	0.0352886	0.66292	0.444	0.826	1
TMEM230	0.404766	0.662118	0.452	0.785	1
HPCAL1	0.00131284	0.660268	0.226	0.508	1
RPS4X	3.83095e-09	0.657138	0.823	0.969	8.27601e-05
TPGS2	0.0929191	0.656571	0.331	0.611	1
IGFBP7	6.73228e-05	0.653541	0.911	0.991	1
GNAS	5.78683e-09	0.652882	0.952	1	0.000125013
MT-TV	0.577585	0.649983	0.266	0.371	1
GNG11	0.16023	0.64957	0.452	0.813	1
MAP4K4	0.149232	0.644661	0.427	0.749	1
DYNC1LI2	0.0028475	0.644155	0.339	0.716	1
RPS13	1.64954e-07	0.640094	0.823	0.991	0.00356349
EPN1	0.00682275	0.638639	0.355	0.71	1
SKP1	0.755766	0.63668	0.484	0.796	1
RPS5	1.50679e-07	0.633003	0.823	0.971	0.00325511
SCP2	0.604335	0.631246	0.411	0.688	1
NME4	0.810535	0.630876	0.508	0.807	1
RPL35A	1.91196e-05	0.630253	0.758	0.985	0.413041
RPL12	3.74909e-05	0.629509	0.798	0.985	0.809917
RHOC	0.748398	0.627092	0.492	0.82	1
PLAC9	0.104118	0.626379	0.315	0.567	1
MT-TF	9.02562e-08	0.625167	0.073	0.347	0.0019498
IFITM3	2.56708e-05	0.620952	0.895	0.976	0.554566
SEPT2	0.0816333	0.619747	0.629	0.886	1
IGFBP6	0.974587	0.618724	0.581	0.912	1
RPL38	1.26115e-08	0.618715	0.847	0.993	0.000272446
RPS2	8.32412e-06	0.618081	0.919	0.993	0.179826
ATP6V1F	0.0841656	0.617863	0.444	0.82	1
CD151	0.0867736	0.614143	0.613	0.947	1
RPS20	2.0783e-05	0.61129	0.879	0.987	0.448975
HHLA2	0.580376	0.610078	0.29	0.396	1
RPS23	1.89365e-06	0.605865	0.815	0.976	0.0409086
OST4	0.0968059	0.605394	0.629	0.943	1
POLR2L	0.0292591	0.602123	0.395	0.778	1
PEBP1	0.267485	0.59296	0.484	0.844	1
NDUFAF3	0.020855	0.590368	0.258	0.505	1
DCTN1	0.102479	0.58801	0.427	0.778	1
TUBA1B	7.67006e-08	0.586647	0.355	0.844	0.00165696
RPL27A	1.51021e-05	0.586267	0.831	0.996	0.326252
NENF	0.0090527	0.586135	0.347	0.723	1
PEA15	0.00555745	0.585268	0.444	0.868	1
PRDX2	0.124785	0.5852	0.379	0.699	1
MT-TI	0.00462557	0.584869	0.242	0.499	1
RPL31	2.1395e-05	0.583698	0.831	0.982	0.462195
RPL30	2.62641e-06	0.583381	0.847	0.998	0.0567384
HIGD1A	0.116284	0.582743	0.282	0.497	1
RPS8	1.66558e-07	0.579171	0.855	0.98	0.00359816
FLJ44635	0.0053198	0.575156	0.726	0.938	1
ELK3	0.125166	0.574983	0.339	0.607	1
RPL29	0.000453028	0.574342	0.75	0.967	1
CAV2	0.000573864	0.573477	0.339	0.738	1
GPX1	0.993693	0.571302	0.556	0.866	1
RBM3	0.357536	0.569407	0.46	0.809	1
TPT1	7.81671e-07	0.566233	0.984	1	0.0168864
RPL23A	1.45417e-06	0.565947	0.831	0.993	0.0314144
RANBP1	7.61822e-06	0.565655	0.226	0.602	0.164576
RPS11	7.92082e-06	0.56226	0.879	0.993	0.171114
ITGA3	0.0162475	0.559716	0.202	0.396	1
SULF1	0.00155791	0.558511	0.21	0.455	1
MT1L	0.335608	0.55397	0.21	0.305	1
DYNLT3	0.00558758	0.551881	0.25	0.521	1
RPL10A	2.39726e-05	0.549706	0.79	0.947	0.517881
RPS27A	1.70791e-06	0.543745	0.839	0.976	0.0368959
CRTAP	0.0117891	0.543179	0.75	0.96	1
COX4I1	0.0951613	0.541216	0.645	0.927	1
FXYD5	0.0733489	0.540433	0.427	0.815	1
SUMO3	0.00172294	0.537837	0.323	0.688	1
RPS21	0.00476255	0.537687	0.702	0.947	1
PON2	0.00134953	0.536232	0.218	0.484	1
RPS6	2.73427e-05	0.532894	0.887	0.985	0.590684
AP3S1	0.211802	0.531904	0.476	0.826	1
SH3BGRL	0.00620476	0.531564	0.371	0.752	1
SEP15	0.298917	0.530772	0.484	0.798	1
NT5E	0.000773196	0.528046	0.25	0.554	1
SLC25A39	0.00223824	0.525926	0.355	0.736	1
MAPK3	0.00673333	0.524804	0.323	0.673	1
ANXA5	0.0316804	0.52181	0.839	0.974	1
RPL23	9.42478e-08	0.521286	0.911	0.993	0.00203603
ARHGDIB	3.52687e-05	0.520915	0.145	0.409	0.76191
RPL15	1.15241e-06	0.520431	0.887	0.993	0.0248956
RPS6KA2	0.000418959	0.519684	0.282	0.622	1
LINC01420	3.07278e-05	0.519628	0.226	0.565	0.663813
DKK3	0.631246	0.51837	0.556	0.899	1
PARVA	0.309017	0.516407	0.444	0.723	1
ITGBL1	0.00176635	0.51636	0.218	0.468	1
ZEB1	3.23247e-07	0.515812	0.21	0.598	0.00698311
MSRB3	0.000399617	0.513292	0.266	0.602	1
HMGN2	9.78986e-06	0.512983	0.266	0.653	0.21149
EEF1D	0.0354531	0.512508	0.427	0.833	1
LINC01057	0.723366	0.512368	0.435	0.604	1
TAF10	0.0678291	0.509862	0.444	0.853	1
WDR1	0.102639	0.506081	0.419	0.776	1
BSG	0.0468456	0.504723	0.484	0.888	1
TBCB	0.00104713	0.504403	0.298	0.657	1
ARHGDIA	0.709424	0.504363	0.605	0.93	1
MPV17	0.114547	0.502421	0.411	0.758	1
ATN1	2.85872e-14	-0.500057	0.355	0.932	6.17569e-10
GATA6	1.50894e-24	-0.500166	0.04	0.624	3.25976e-20
ACSL3	8.26475e-24	-0.50056	0.105	0.721	1.78543e-19
VEZF1	1.24372e-28	-0.500683	0.056	0.721	2.6868e-24
PRICKLE2	2.82238e-27	-0.500721	0.048	0.675	6.09718e-23
RNMT	7.13643e-20	-0.500778	0.016	0.492	1.54168e-15
SPAG7	1.32026e-21	-0.500864	0.089	0.666	2.85217e-17
ADD3	1.34432e-12	-0.50103	0.387	0.892	2.90414e-08
MXI1	5.66914e-23	-0.50114	0.137	0.752	1.2247e-18
TNFRSF10B	1.96749e-30	-0.50168	0.065	0.749	4.25038e-26
COPS2	6.40839e-28	-0.501717	0.137	0.846	1.3844e-23
RARS	7.03073e-26	-0.502387	0.04	0.642	1.51885e-21
HDAC2	1.00601e-26	-0.502562	0.097	0.765	2.17328e-22
ZRANB2	2.88388e-23	-0.503028	0.081	0.668	6.23005e-19
KDSR	1.02549e-21	-0.503695	0.129	0.749	2.21537e-17
AMOTL2	1.5218e-20	-0.504068	0.073	0.613	3.28755e-16
RRAGC	4.21167e-24	-0.504343	0.048	0.631	9.09847e-20
USP3	3.58275e-20	-0.504709	0.016	0.497	7.73982e-16
UBE2R2	3.31971e-21	-0.504823	0.202	0.848	7.17158e-17
FGF7	3.86812e-20	-0.505237	0.065	0.596	8.3563e-16
NR4A1	6.36482e-14	-0.505398	0.032	0.409	1.37499e-09
PDS5B	5.01124e-24	-0.505899	0.008	0.547	1.08258e-19
SESTD1	2.48685e-19	-0.505959	0.04	0.527	5.37234e-15
COL1A1	8.4783e-06	-0.506269	0.766	0.98	0.183157
CAPRIN1	4.64883e-23	-0.506366	0.153	0.771	1.00429e-18
WBP1L	2.29337e-22	-0.506549	0.024	0.554	4.95437e-18
LIF	7.88545e-13	-0.506715	0.065	0.444	1.70349e-08
NOTCH2	7.96638e-28	-0.506836	0.04	0.666	1.72098e-23
ANKRD10	9.76134e-20	-0.507111	0.032	0.516	2.10874e-15
YTHDF3	1.59562e-25	-0.508545	0.056	0.659	3.44702e-21
TPST1	5.80909e-21	-0.508685	0.113	0.681	1.25494e-16
STX4	1.51599e-22	-0.508725	0.024	0.549	3.275e-18
RBMX	4.59858e-22	-0.508963	0.113	0.714	9.93431e-18
SLC38A1	1.27247e-20	-0.509176	0.081	0.633	2.74892e-16
ADGRA2	3.28474e-19	-0.509322	0.129	0.69	7.09603e-15
EML4	3.88098e-27	-0.510201	0.016	0.607	8.38407e-23
UBE2I	1.17218e-23	-0.510862	0.129	0.758	2.53225e-19
TRIM25	2.25463e-23	-0.511642	0.032	0.582	4.87067e-19
SIAH2	3.06123e-17	-0.51172	0.032	0.473	6.61318e-13
SEC31A	3.50592e-15	-0.511932	0.347	0.925	7.57383e-11
RIPK2	1.32381e-20	-0.512227	0.04	0.554	2.85982e-16
SLK	3.07815e-25	-0.512284	0.04	0.635	6.64973e-21
PLEKHA2	1.63089e-21	-0.512531	0.032	0.549	3.52321e-17
HNRNPR	1.2511e-21	-0.513234	0.153	0.78	2.70274e-17
S1PR2	8.30411e-26	-0.513629	0.032	0.62	1.79394e-21
ANKRD17	5.46783e-27	-0.514159	0.048	0.67	1.18122e-22
CXCL1	7.626e-08	-0.514166	0.218	0.56	0.00164745
CHMP2B	3.53219e-23	-0.514286	0.073	0.653	7.6306e-19
KIF1B	1.07425e-27	-0.514678	0.04	0.673	2.32071e-23
SYNRG	4.65411e-25	-0.515196	0.04	0.624	1.00543e-20
IFIT3	5.78505e-21	-0.515622	0.024	0.53	1.24974e-16
ARL8B	4.57085e-22	-0.516328	0.113	0.705	9.8744e-18
SRP72	2.47538e-20	-0.51682	0.177	0.796	5.34756e-16
SCFD1	9.74658e-24	-0.516913	0.089	0.692	2.10555e-19
FBXO32	1.38746e-16	-0.517382	0.016	0.431	2.99733e-12
CCAR1	2.65466e-23	-0.51753	0.113	0.736	5.73485e-19
TRIB3	6.69936e-19	-0.518179	0.073	0.585	1.44726e-14
PIK3C2A	1.0023e-21	-0.518277	0.073	0.631	2.16526e-17
CSGALNACT2	3.06921e-20	-0.518949	0.081	0.626	6.63042e-16
ABCA1	4.84592e-22	-0.519371	0.048	0.591	1.04686e-17
ZFP36L2	1.02618e-22	-0.519995	0.153	0.798	2.21686e-18
SMIM15	2.99033e-23	-0.520163	0.032	0.58	6.46002e-19
BRI3	6.29433e-17	-0.520553	0.331	0.927	1.35976e-12
PXDN	9.6992e-13	-0.522154	0.395	0.877	2.09532e-08
DUSP6	4.79444e-20	-0.522726	0.048	0.563	1.03574e-15
HM13	9.23805e-22	-0.522788	0.194	0.833	1.9957e-17
RBM25	6.38258e-24	-0.524192	0.097	0.716	1.37883e-19
SESN2	4.55342e-23	-0.525695	0.081	0.675	9.83676e-19
HLA-A	4.24818e-08	-0.526124	0.766	0.993	0.000917735
MAPRE2	5.38311e-29	-0.527336	0.073	0.743	1.16291e-24
NCOR1	1.92098e-24	-0.528152	0.113	0.752	4.14988e-20
ZBTB20	1.23622e-16	-0.528519	0.226	0.811	2.6706e-12
ARID4B	2.02236e-25	-0.528876	0.04	0.637	4.3689e-21
CNP	3.32198e-23	-0.529602	0.081	0.664	7.17647e-19
CBX6	2.53717e-21	-0.530066	0.056	0.589	5.48105e-17
RAB14	2.85984e-29	-0.530634	0.073	0.76	6.17812e-25
HNRNPK	3.07356e-18	-0.531134	0.331	0.919	6.6398e-14
KLF9	3.80969e-25	-0.53115	0.065	0.684	8.23006e-21
SYNE1	7.09881e-26	-0.531314	0.073	0.703	1.53356e-21
TRPS1	5.83446e-25	-0.531322	0.048	0.644	1.26042e-20
NRP1	2.7553e-14	-0.531332	0.379	0.87	5.95227e-10
PAFAH1B1	1.32762e-28	-0.53137	0.097	0.8	2.86805e-24
NFATC4	6.78171e-26	-0.531924	0.016	0.593	1.46505e-21
ARGLU1	1.91158e-24	-0.53312	0.065	0.664	4.12959e-20
PSMD12	1.8533e-26	-0.534003	0.073	0.716	4.00369e-22
DDAH2	3.48967e-25	-0.534415	0.073	0.688	7.53873e-21
USP34	2.02997e-20	-0.534835	0.161	0.767	4.38534e-16
YTHDC1	4.94207e-26	-0.535141	0.048	0.664	1.06764e-21
DRAM1	1.19308e-22	-0.535626	0.105	0.703	2.57741e-18
IRF1	2.34823e-25	-0.536069	0.04	0.635	5.07287e-21
H1FX	1.1962e-19	-0.536562	0.121	0.684	2.58416e-15
CMIP	4.76516e-23	-0.536645	0.04	0.589	1.02942e-18
RHOG	2.12929e-24	-0.536991	0.081	0.684	4.5999e-20
DHRS3	5.35013e-19	-0.537432	0.04	0.514	1.15579e-14
SNRPB2	1.21221e-26	-0.537554	0.056	0.686	2.61874e-22
NNMT	1.16246e-21	-0.537862	0.097	0.679	2.51126e-17
PSMD11	1.25858e-26	-0.538099	0.097	0.749	2.7189e-22
DTWD1	2.69603e-23	-0.538108	0.04	0.604	5.82423e-19
PIAS1	3.23267e-23	-0.538176	0.008	0.534	6.98355e-19
ODF2L	7.71972e-24	-0.539057	0.04	0.611	1.66769e-19
ROCK2	1.60045e-24	-0.540431	0.153	0.822	3.45746e-20
CBX4	5.80136e-26	-0.541093	0.089	0.725	1.25327e-21
FNBP4	2.01285e-24	-0.542272	0.065	0.657	4.34837e-20
MGAT1	1.12166e-27	-0.542517	0.048	0.684	2.42313e-23
DNAJB9	1.78241e-25	-0.543082	0.065	0.67	3.85053e-21
SLC39A14	2.10301e-25	-0.543208	0.113	0.776	4.54312e-21
PRPF4B	7.15356e-24	-0.543577	0.048	0.622	1.54538e-19
ITPRIP	7.86482e-24	-0.543666	0.032	0.596	1.69904e-19
TSC22D1	6.51934e-20	-0.544024	0.113	0.67	1.40837e-15
PIM3	1.12491e-14	-0.544738	0.024	0.404	2.43015e-10
CNTNAP1	3.5547e-25	-0.545084	0.081	0.697	7.67922e-21
THBS2	6.11251e-12	-0.545539	0.548	0.96	1.32049e-07
COL6A2	2.09968e-11	-0.545582	0.621	0.991	4.53593e-07
FNDC3B	1.14176e-20	-0.545678	0.258	0.914	2.46654e-16
SYPL1	7.08999e-26	-0.545753	0.073	0.692	1.53165e-21
HNRNPH1	9.21218e-21	-0.546906	0.169	0.793	1.99011e-16
TRIP10	1.15232e-19	-0.547282	0.194	0.796	2.48937e-15
PICALM	1.98562e-23	-0.547315	0.129	0.776	4.28953e-19
CSNK1A1	1.20418e-27	-0.547574	0.121	0.796	2.6014e-23
USP22	2.67961e-24	-0.548023	0.194	0.859	5.78877e-20
RBFOX2	9.3199e-25	-0.548025	0.169	0.824	2.01338e-20
PNPLA8	2.13338e-26	-0.54819	0.048	0.664	4.60875e-22
XBP1	1.52e-26	-0.548249	0.105	0.787	3.28365e-22
LATS1	1.8802e-21	-0.548537	0.032	0.543	4.06179e-17
RSL24D1	1.02867e-22	-0.5493	0.153	0.791	2.22224e-18
WIPF2	1.04881e-29	-0.549395	0.048	0.716	2.26575e-25
PDHB	2.04349e-24	-0.549687	0.024	0.587	4.41455e-20
PFKFB3	1.2624e-11	-0.550568	0.008	0.31	2.72716e-07
PPP4R2	2.26562e-28	-0.551048	0.065	0.725	4.89443e-24
SLC3A2	4.7307e-14	-0.551155	0.315	0.864	1.02197e-09
CGGBP1	8.33532e-28	-0.551692	0.073	0.732	1.80068e-23
SNHG12	7.03032e-17	-0.551723	0.04	0.484	1.51876e-12
SLC5A3	7.58242e-19	-0.552042	0.056	0.554	1.63803e-14
PRRC2B	1.93771e-25	-0.552433	0.121	0.789	4.18603e-21
SNX9	5.48047e-26	-0.553367	0.145	0.833	1.18395e-21
COPB1	7.09507e-20	-0.553741	0.218	0.855	1.53275e-15
ATRX	4.2491e-21	-0.554024	0.218	0.862	9.17933e-17
PDGFRB	2.31001e-23	-0.554792	0.137	0.771	4.99031e-19
G3BP2	3.94699e-27	-0.556253	0.097	0.756	8.52669e-23
PPP2R5E	1.25221e-28	-0.556639	0.065	0.727	2.70515e-24
PHF3	2.86225e-26	-0.557169	0.073	0.703	6.18333e-22
MKRN1	3.38455e-28	-0.557266	0.081	0.747	7.31165e-24
FDFT1	8.60195e-20	-0.557452	0.129	0.701	1.85828e-15
ASH1L	3.05963e-25	-0.558065	0.048	0.648	6.60972e-21
GADD45B	1.60242e-16	-0.558294	0.024	0.444	3.46171e-12
ZNF471	1.38352e-23	-0.558314	0.065	0.648	2.98882e-19
SEC24D	4.30905e-28	-0.559002	0.097	0.778	9.30883e-24
RALA	3.31915e-26	-0.559562	0.097	0.76	7.17037e-22
KDM5B	1.49774e-28	-0.559654	0.081	0.763	3.23556e-24
SPAG9	7.41957e-25	-0.560178	0.129	0.785	1.60285e-20
NFAT5	1.90679e-30	-0.560559	0.065	0.756	4.11923e-26
ADAM17	6.46582e-26	-0.560565	0.056	0.673	1.39681e-21
LBH	2.88463e-20	-0.561238	0.056	0.578	6.23167e-16
FGFR1	1.60346e-23	-0.561971	0.161	0.807	3.46396e-19
SOCS5	1.89063e-26	-0.562344	0.073	0.71	4.08432e-22
PRPF8	1.03773e-23	-0.562669	0.145	0.789	2.24181e-19
BRD2	1.99927e-24	-0.563068	0.153	0.824	4.31901e-20
SPRED1	1.08065e-23	-0.563166	0.024	0.567	2.33452e-19
TNPO1	2.01432e-17	-0.563289	0.315	0.866	4.35154e-13
IST1	8.97864e-28	-0.563516	0.065	0.716	1.93965e-23
VMP1	3.68292e-19	-0.5655	0.218	0.84	7.95621e-15
DAXX	4.72248e-26	-0.566121	0.073	0.699	1.0202e-21
STK17A	2.85902e-21	-0.566418	0.04	0.56	6.17634e-17
SERTAD2	3.56339e-20	-0.567017	0.04	0.541	7.698e-16
ZBTB38	2.59294e-25	-0.567276	0.105	0.741	5.60152e-21
PXN	1.66203e-23	-0.567565	0.161	0.809	3.59049e-19
MKLN1	4.65935e-26	-0.567628	0.089	0.741	1.00656e-21
HOOK3	2.28395e-27	-0.567872	0.089	0.76	4.93401e-23
MORF4L2	6.59382e-22	-0.568374	0.21	0.897	1.42446e-17
NR3C1	3.38206e-21	-0.568422	0.234	0.888	7.30626e-17
HAND2	2.90134e-24	-0.568423	0.089	0.697	6.26776e-20
GATAD1	1.0154e-25	-0.568929	0.032	0.622	2.19358e-21
LOC100131257	9.0468e-22	-0.56959	0.274	0.903	1.95438e-17
KDM2A	2.7721e-28	-0.569658	0.048	0.688	5.98856e-24
CTGF	2.18982e-14	-0.570263	0.024	0.404	4.73067e-10
PLCB1	3.88419e-19	-0.57178	0.089	0.624	8.39102e-15
TRAM2	6.93092e-32	-0.572412	0.04	0.721	1.49729e-27
BTAF1	1.18029e-18	-0.572717	0.048	0.525	2.54978e-14
C3orf58	5.49359e-18	-0.573297	0.073	0.567	1.18678e-13
TIPARP	1.17076e-17	-0.573976	0.024	0.464	2.52919e-13
GCC2	3.04247e-26	-0.574215	0.048	0.659	6.57265e-22
BPTF	9.45973e-25	-0.574473	0.105	0.747	2.04359e-20
PSAT1	2.48874e-12	-0.574962	0.258	0.684	5.37643e-08
COL14A1	5.65794e-14	-0.576172	0.226	0.719	1.22228e-09
YPEL3	4.48346e-25	-0.576222	0.137	0.793	9.68562e-21
TNFRSF1A	1.67329e-22	-0.576364	0.121	0.73	3.61481e-18
ZKSCAN1	4.68761e-26	-0.577183	0.089	0.734	1.01266e-21
PTK2	3.03279e-23	-0.577364	0.032	0.576	6.55175e-19
MAGED2	2.54664e-21	-0.577537	0.153	0.778	5.50151e-17
MLLT6	2.10764e-27	-0.578467	0.065	0.699	4.55313e-23
RBBP6	7.82082e-25	-0.578501	0.081	0.699	1.68953e-20
FOXO3	3.89058e-26	-0.57868	0.008	0.58	8.40482e-22
PGM3	4.72946e-27	-0.578962	0.097	0.771	1.02171e-22
YKT6	7.30248e-24	-0.579964	0.089	0.695	1.57755e-19
OSMR	3.14451e-24	-0.580166	0.177	0.837	6.79308e-20
STXBP5	1.8482e-24	-0.580201	0.056	0.64	3.99267e-20
CHMP1B	1.14878e-25	-0.580395	0.048	0.648	2.48171e-21
SASH1	4.92531e-26	-0.581617	0.04	0.642	1.06401e-21
CNOT8	2.34878e-20	-0.581798	0.024	0.519	5.07406e-16
HP1BP3	2.38274e-25	-0.583106	0.185	0.862	5.14743e-21
CHD4	2.21888e-24	-0.584109	0.177	0.815	4.79345e-20
AHNAK	1.55317e-19	-0.585364	0.298	0.916	3.35531e-15
LMO4	1.94597e-23	-0.586112	0.177	0.84	4.20389e-19
FGF2	2.83573e-22	-0.587023	0.161	0.798	6.12602e-18
FAM13A	5.76916e-17	-0.58785	0.032	0.468	1.24631e-12
HIC1	7.27964e-22	-0.587884	0.113	0.699	1.57262e-17
IFI16	7.30879e-26	-0.587906	0.121	0.789	1.57892e-21
UBE3A	1.5056e-28	-0.588758	0.081	0.754	3.25254e-24
CHD9	2.5206e-27	-0.590548	0.097	0.76	5.44525e-23
MTSS1	7.9541e-17	-0.590606	0.016	0.429	1.71832e-12
SF3B1	4.40808e-22	-0.590662	0.194	0.842	9.52277e-18
CSRP2	3.14094e-18	-0.590697	0.065	0.552	6.78537e-14
TANC2	2.81892e-23	-0.590786	0.024	0.565	6.0897e-19
COL4A2	1.33623e-14	-0.591026	0.347	0.923	2.88666e-10
EIF5	4.40001e-20	-0.592274	0.169	0.763	9.50535e-16
CDC42EP4	4.08669e-25	-0.59359	0.016	0.576	8.82847e-21
CYP51A1	2.33142e-20	-0.593616	0.153	0.749	5.03657e-16
NINJ1	9.72851e-16	-0.593652	0.073	0.516	2.10165e-11
UNC5B	1.71342e-14	-0.593797	0.194	0.688	3.70151e-10
FAM198B	1.02972e-22	-0.593804	0.048	0.602	2.2245e-18
KLF4	8.51304e-22	-0.594192	0.089	0.662	1.83907e-17
PHC2	2.31112e-27	-0.594817	0.04	0.655	4.99271e-23
PSMA6	2.83535e-28	-0.595228	0.097	0.769	6.12521e-24
LOC101928103	1.47024e-21	-0.595311	0.153	0.791	3.17616e-17
NFE2L2	2.09788e-25	-0.595935	0.105	0.763	4.53206e-21
HSPA9	2.82822e-23	-0.597074	0.153	0.793	6.1098e-19
MARCKS	1.34216e-17	-0.59736	0.476	0.985	2.89946e-13
BTG1	1.73579e-27	-0.598096	0.145	0.868	3.74982e-23
MKNK2	1.99972e-23	-0.598172	0.113	0.732	4.31999e-19
PSMD7	1.56941e-28	-0.600716	0.089	0.765	3.3904e-24
PPP2R2A	3.03513e-23	-0.601555	0.081	0.668	6.55678e-19
SERP1	1.63742e-17	-0.601725	0.315	0.897	3.53732e-13
TMF1	5.11791e-27	-0.601765	0.073	0.723	1.10562e-22
FMOD	1.10167e-14	-0.602306	0.129	0.596	2.37993e-10
MEIS1	1.95117e-26	-0.602912	0.081	0.725	4.21512e-22
SSC5D	3.26733e-22	-0.604075	0.153	0.767	7.05841e-18
BDKRB1	8.28745e-18	-0.605843	0.177	0.73	1.79034e-13
CAMK2D	2.86087e-25	-0.605968	0.105	0.741	6.18035e-21
MPHOSPH8	1.19207e-26	-0.606671	0.056	0.673	2.57523e-22
TMX4	0.121869	-0.607182	0.669	0.791	1
DGKH	2.41889e-21	-0.608725	0.016	0.514	5.22552e-17
OSBPL8	2.62015e-20	-0.608814	0.234	0.862	5.66032e-16
SLC7A11	1.53001e-17	-0.609373	0.169	0.736	3.30527e-13
SMTN	3.79021e-17	-0.610474	0.032	0.47	8.18799e-13
THBS1	2.02305e-20	-0.613024	0.04	0.549	4.37039e-16
AHCYL1	5.45489e-26	-0.613132	0.161	0.879	1.17842e-21
LZTS2	1.48094e-24	-0.61534	0.016	0.571	3.19927e-20
MRPS6	2.1446e-20	-0.617077	0.097	0.653	4.63297e-16
ZC3H11A	7.78108e-26	-0.617238	0.161	0.837	1.68095e-21
ITGA5	3.78895e-17	-0.617418	0.347	0.927	8.18527e-13
GFPT1	1.48014e-23	-0.617658	0.169	0.811	3.19754e-19
JMJD1C	3.9558e-27	-0.618497	0.032	0.646	8.54572e-23
PRRC2C	9.85894e-19	-0.618794	0.282	0.888	2.12983e-14
VCP	1.91256e-23	-0.619937	0.194	0.846	4.1317e-19
ALDOC	1.77812e-07	-0.62151	0.089	0.343	0.00384127
HGS	6.15416e-26	-0.622563	0.105	0.758	1.32948e-21
SRRM1	1.71289e-26	-0.622852	0.048	0.657	3.70037e-22
MAPKAPK2	4.83941e-25	-0.623727	0.169	0.859	1.04546e-20
COL5A1	2.91289e-15	-0.62422	0.355	0.884	6.29271e-11
NPR3	1.21017e-10	-0.624308	0.137	0.51	2.61433e-06
EIF4A2	2.12196e-17	-0.624584	0.306	0.901	4.58408e-13
SLC6A6	4.24289e-10	-0.625073	0.024	0.301	9.16591e-06
NOLC1	4.15441e-27	-0.625683	0.032	0.646	8.97478e-23
RELA	2.05994e-24	-0.625742	0.032	0.598	4.45008e-20
EIF2S2	5.73348e-16	-0.625802	0.306	0.877	1.2386e-11
MIDN	3.08577e-30	-0.627124	0.04	0.703	6.66619e-26
USP9X	4.59815e-30	-0.627554	0.121	0.844	9.93338e-26
RICTOR	2.67164e-21	-0.627686	0.032	0.549	5.77155e-17
SV2A	1.30028e-27	-0.629368	0.081	0.747	2.80899e-23
PAG1	2.78892e-17	-0.629857	0.008	0.429	6.02491e-13
C1R	3.5788e-15	-0.632598	0.653	0.976	7.73127e-11
PUM1	9.95558e-27	-0.633875	0.129	0.813	2.1507e-22
DDX3Y	2.70996e-28	-0.634527	0.073	0.736	5.85434e-24
CLN8	1.41664e-24	-0.63518	0	0.538	3.06037e-20
DLC1	2.83844e-20	-0.635345	0.177	0.782	6.13188e-16
BRD4	1.45665e-26	-0.635653	0.145	0.818	3.1468e-22
IFRD1	4.99559e-25	-0.635655	0.056	0.655	1.0792e-20
LASP1	3.86271e-24	-0.640009	0.185	0.855	8.34461e-20
KMT2C	5.11912e-27	-0.640982	0.04	0.648	1.10588e-22
STARD4	1.63619e-22	-0.642158	0.048	0.598	3.53467e-18
RBM5	1.7376e-29	-0.642784	0.016	0.64	3.75374e-25
TARS	2.75744e-26	-0.643512	0.129	0.809	5.95689e-22
FOS	5.5898e-11	-0.643762	0.298	0.754	1.20756e-06
CFLAR	6.47953e-27	-0.643784	0.121	0.809	1.39977e-22
XIAP	1.02242e-29	-0.645996	0.073	0.756	2.20874e-25
MBNL2	9.60728e-28	-0.64626	0.121	0.807	2.07546e-23
IRF2BP2	2.1119e-34	-0.646409	0.097	0.848	4.56233e-30
MYADM	4.97632e-19	-0.647526	0.169	0.747	1.07503e-14
KLHDC3	3.99045e-31	-0.648199	0.048	0.727	8.62056e-27
RHBDF1	3.70557e-25	-0.648257	0.113	0.754	8.00513e-21
HK2	6.26489e-14	-0.649959	0.04	0.422	1.3534e-09
PLEKHA5	7.59025e-25	-0.650309	0.097	0.721	1.63972e-20
P4HA1	2.05622e-12	-0.650758	0.339	0.862	4.44205e-08
USP47	3.79594e-27	-0.65101	0.048	0.664	8.20038e-23
NFKBIZ	4.72943e-21	-0.651169	0.21	0.862	1.0217e-16
KRT10	1.64503e-26	-0.652199	0.137	0.829	3.55376e-22
VASN	2.2905e-20	-0.652774	0.185	0.787	4.94817e-16
ABL1	2.90456e-29	-0.652854	0.097	0.796	6.27471e-25
LDLR	9.02128e-18	-0.653331	0.129	0.646	1.94887e-13
DDIT3	1.72025e-19	-0.653529	0.04	0.527	3.71626e-15
MAP3K2	4.14713e-27	-0.654105	0.105	0.774	8.95904e-23
BCL9L	8.20104e-32	-0.655092	0.081	0.796	1.77167e-27
ETS1	1.05299e-27	-0.657193	0.024	0.637	2.27478e-23
TUG1	4.57733e-29	-0.657466	0.089	0.782	9.88841e-25
CRKL	1.01127e-27	-0.65772	0.024	0.635	2.18464e-23
ASAP1	1.9541e-29	-0.658183	0.073	0.738	4.22144e-25
KPNB1	1.66463e-16	-0.659393	0.371	0.925	3.59609e-12
EPRS	4.40624e-23	-0.660121	0.121	0.705	9.51879e-19
RBPMS	2.12202e-19	-0.660889	0.242	0.877	4.5842e-15
PSMC6	1.07723e-27	-0.661088	0.048	0.675	2.32715e-23
PRRC1	2.02773e-29	-0.661323	0.056	0.723	4.38051e-25
PTBP1	3.6772e-30	-0.66314	0.097	0.804	7.94386e-26
ARID5B	2.76431e-24	-0.664019	0.113	0.765	5.97175e-20
ZNF652	3.61566e-26	-0.664435	0.016	0.593	7.8109e-22
ATP2B1	2.2023e-29	-0.665193	0.073	0.758	4.75762e-25
BNC2	7.2384e-28	-0.665815	0.048	0.677	1.56371e-23
PDLIM4	4.45276e-25	-0.666304	0.105	0.747	9.6193e-21
DAB2	2.33143e-29	-0.666537	0.121	0.84	5.03658e-25
LAMB2	2.2732e-21	-0.667871	0.21	0.842	4.91079e-17
SLC25A37	1.30198e-28	-0.668421	0.065	0.719	2.81267e-24
COL8A1	1.06404e-19	-0.668692	0.177	0.76	2.29865e-15
NKTR	1.01344e-27	-0.668958	0.065	0.703	2.18934e-23
CCNL2	8.75462e-29	-0.669673	0.081	0.756	1.89126e-24
MTDH	5.14709e-22	-0.669914	0.282	0.916	1.11193e-17
MAN2A1	8.33442e-18	-0.670294	0.347	0.895	1.80048e-13
VAPA	3.33568e-24	-0.670647	0.25	0.925	7.20606e-20
ZFHX3	3.53965e-28	-0.670773	0.129	0.84	7.6467e-24
KCNE4	3.85822e-26	-0.671649	0.113	0.765	8.33491e-22
PCDH7	8.86205e-24	-0.672131	0.081	0.67	1.91447e-19
CFB	6.77889e-16	-0.672267	0.242	0.782	1.46444e-11
CELF1	1.61978e-32	-0.672636	0.089	0.826	3.49921e-28
TROVE2	1.05475e-29	-0.673911	0.048	0.714	2.27857e-25
LINC-PINT	3.09636e-16	-0.674525	0.024	0.44	6.68907e-12
HIST1H1C	3.03272e-15	-0.674959	0.097	0.549	6.55159e-11
SETD5	2.13298e-28	-0.677731	0.081	0.754	4.60787e-24
P4HA2	6.9958e-17	-0.679565	0.258	0.842	1.5113e-12
LMAN1	1.15529e-14	-0.681435	0.403	0.969	2.49578e-10
RAB1A	9.21642e-24	-0.682734	0.218	0.892	1.99102e-19
BCAT1	5.8139e-19	-0.683685	0.25	0.859	1.25598e-14
ZBTB7A	6.49518e-27	-0.685462	0.137	0.811	1.40315e-22
HLA-E	1.62104e-20	-0.685743	0.29	0.925	3.50194e-16
AFF4	1.39381e-31	-0.685749	0.081	0.798	3.01104e-27
C1S	3.45303e-14	-0.68708	0.782	0.974	7.45959e-10
TCEAL9	1.2137e-25	-0.688234	0.194	0.879	2.62196e-21
LPP	6.91446e-25	-0.689823	0.218	0.868	1.49373e-20
LINC00504	1.33032e-19	-0.690606	0.266	0.888	2.8739e-15
IQGAP1	1.16803e-23	-0.690773	0.194	0.851	2.5233e-19
PHF1	5.30177e-21	-0.694461	0.105	0.675	1.14534e-16
TPR	8.68778e-27	-0.696299	0.081	0.719	1.87682e-22
ANKRD12	1.77934e-26	-0.697771	0.097	0.745	3.8439e-22
NUFIP2	3.80727e-32	-0.698288	0.065	0.778	8.22485e-28
PDE4DIP	3.95247e-29	-0.702537	0.048	0.71	8.53852e-25
PJA2	2.98908e-24	-0.70417	0.202	0.864	6.45732e-20
FOSB	6.20341e-18	-0.704315	0.202	0.769	1.34012e-13
KLF7	3.0147e-24	-0.70607	0.016	0.567	6.51266e-20
BASP1	7.36829e-24	-0.706546	0.226	0.905	1.59177e-19
PGRMC2	5.04658e-29	-0.70663	0.097	0.787	1.09021e-24
H3F3B	2.86386e-17	-0.707746	0.371	0.91	6.1868e-13
ARHGEF2	4.73402e-29	-0.709089	0.105	0.787	1.02269e-24
MFAP2	2.9382e-22	-0.709169	0.153	0.756	6.34738e-18
BAZ1A	1.05568e-29	-0.709708	0.032	0.679	2.28059e-25
NPEPPS	2.51537e-27	-0.71005	0.153	0.873	5.43396e-23
GABARAPL1	2.37118e-25	-0.716818	0.04	0.622	5.12245e-21
DHX15	5.0898e-29	-0.71816	0.048	0.699	1.09955e-24
EIF1	3.30088e-15	-0.718238	0.806	1	7.13088e-11
H1F0	1.65394e-26	-0.718378	0.073	0.703	3.573e-22
KCNQ1OT1	1.47157e-13	-0.718656	0.492	0.949	3.17904e-09
DDX17	2.7891e-26	-0.721133	0.169	0.888	6.0253e-22
AAK1	1.45268e-30	-0.723027	0.097	0.811	3.13822e-26
CLK1	3.57974e-20	-0.723115	0.032	0.523	7.7333e-16
COL16A1	3.0546e-25	-0.723988	0.145	0.782	6.59886e-21
RRBP1	6.70996e-28	-0.72655	0.105	0.747	1.44955e-23
TMEM165	2.22841e-29	-0.726745	0.097	0.802	4.81404e-25
PPP2CA	3.15395e-30	-0.727217	0.097	0.796	6.81347e-26
GRINA	1.80076e-26	-0.728004	0.202	0.89	3.89019e-22
NAMPT	5.55055e-22	-0.728584	0.25	0.886	1.19908e-17
GOLGA2	8.52535e-31	-0.728868	0.081	0.776	1.84173e-26
SPRY1	2.23503e-18	-0.730538	0.161	0.697	4.82834e-14
PHLDA1	1.53266e-16	-0.738061	0.347	0.881	3.31101e-12
PSD3	2.78626e-22	-0.742121	0.194	0.82	6.01916e-18
ERRFI1	4.10953e-16	-0.742412	0.073	0.53	8.87783e-12
ELL2	7.70618e-25	-0.742943	0.169	0.835	1.66477e-20
MARCH6	6.28911e-34	-0.750459	0.081	0.815	1.35864e-29
MLLT1	4.55449e-33	-0.751005	0.056	0.765	9.83907e-29
FAM46A	6.16857e-29	-0.751454	0.016	0.631	1.3326e-24
UBAP1	2.91445e-30	-0.752039	0.04	0.699	6.2961e-26
TBX3	1.80285e-23	-0.752132	0.081	0.673	3.89469e-19
RYBP	2.30392e-21	-0.752712	0.089	0.655	4.97715e-17
CDK5RAP3	7.50709e-27	-0.753095	0.113	0.769	1.62176e-22
GLRX	2.09741e-25	-0.753733	0.177	0.859	4.53103e-21
COL3A1	2.75258e-08	-0.75483	0.726	0.903	0.00059464
POLR2B	5.00338e-32	-0.761066	0.024	0.697	1.08088e-27
ARL4C	1.05483e-25	-0.761958	0.137	0.811	2.27874e-21
COL12A1	7.6487e-16	-0.768349	0.363	0.912	1.65235e-11
EMP1	2.13674e-26	-0.769826	0.081	0.712	4.61599e-22
TUBA1A	2.59654e-26	-0.770696	0.097	0.749	5.6093e-22
CLTC	6.18745e-20	-0.771894	0.419	0.945	1.33667e-15
PKDCC	2.64284e-27	-0.775416	0.089	0.752	5.70932e-23
MSMO1	1.98553e-15	-0.776616	0.21	0.719	4.28935e-11
LAMB1	1.04132e-17	-0.780054	0.427	0.938	2.24956e-13
RBMS1	3.79689e-27	-0.78175	0.161	0.873	8.20242e-23
PGM2L1	8.71055e-26	-0.78234	0.024	0.6	1.88174e-21
LRP1	4.17096e-18	-0.784112	0.427	0.971	9.01052e-14
CD248	1.04381e-14	-0.784206	0.226	0.705	2.25493e-10
UBR4	3.12387e-29	-0.784348	0.121	0.84	6.74851e-25
HNRNPU	2.41049e-25	-0.784772	0.234	0.881	5.20737e-21
ATXN2	2.82164e-31	-0.786647	0.056	0.747	6.09558e-27
MGEA5	3.12958e-28	-0.787588	0.048	0.673	6.76082e-24
BCAR1	1.70328e-22	-0.789769	0.04	0.58	3.67959e-18
MLXIP	1.33199e-29	-0.790286	0.089	0.778	2.87749e-25
GOLGA4	7.10393e-25	-0.790642	0.21	0.873	1.53466e-20
MSL1	3.47388e-33	-0.79561	0.073	0.802	7.50463e-29
SCD	4.70778e-10	-0.795901	0.395	0.881	1.01702e-05
SOD2	1.73271e-14	-0.796133	0.621	0.956	3.74317e-10
HEG1	6.10554e-11	-0.802096	0.532	0.829	1.31898e-06
SQLE	5.2585e-21	-0.808577	0.032	0.541	1.13599e-16
DST	2.05557e-20	-0.816127	0.29	0.877	4.44066e-16
COL4A1	6.14787e-23	-0.81727	0.185	0.829	1.32812e-18
CNOT2	8.04597e-34	-0.817932	0.065	0.8	1.73817e-29
TFG	1.69384e-33	-0.819617	0.097	0.846	3.65921e-29
STAT3	2.7398e-27	-0.821233	0.169	0.859	5.9188e-23
ZFAND3	1.71755e-33	-0.82184	0.048	0.747	3.71043e-29
EGR1	4.39706e-16	-0.823219	0.298	0.829	9.49897e-12
SON	6.48946e-27	-0.825685	0.177	0.879	1.40192e-22
SERPINH1	2.95351e-25	-0.826992	0.258	0.905	6.38047e-21
PLIN2	9.00793e-25	-0.826994	0.169	0.831	1.94598e-20
RBM39	1.31666e-31	-0.829534	0.129	0.884	2.84439e-27
CEBPB	1.17992e-25	-0.834598	0.202	0.912	2.54898e-21
COL6A3	6.32089e-17	-0.836836	0.718	0.96	1.3655e-12
GJA1	1.4322e-22	-0.838261	0.113	0.703	3.09398e-18
FBN1	6.84049e-19	-0.83962	0.379	0.943	1.47775e-14
DDX5	1.68047e-19	-0.840658	0.371	0.925	3.63032e-15
CREBRF	3.1917e-30	-0.847734	0.032	0.686	6.89503e-26
PNISR	3.20734e-27	-0.849641	0.194	0.89	6.92882e-23
ANK3	4.45202e-20	-0.861289	0.105	0.644	9.6177e-16
CBLB	3.44168e-28	-0.863393	0.016	0.626	7.43506e-24
MCL1	2.84357e-28	-0.864836	0.129	0.826	6.14296e-24
YWHAG	7.42134e-29	-0.874443	0.145	0.844	1.60323e-24
TXNIP	3.30463e-25	-0.875819	0.113	0.749	7.139e-21
TWIST1	3.19203e-25	-0.879817	0.065	0.668	6.89575e-21
KMT2A	6.70696e-33	-0.88452	0.097	0.829	1.4489e-28
ADAMTS1	1.87395e-21	-0.887173	0.153	0.736	4.0483e-17
ANKRD11	3.84402e-26	-0.887763	0.161	0.804	8.30423e-22
METRNL	2.68777e-26	-0.888094	0.089	0.71	5.80639e-22
NAV1	5.61845e-21	-0.891823	0.202	0.8	1.21375e-16
ID2	4.40349e-27	-0.897783	0.121	0.793	9.51285e-23
STAG2	5.68002e-37	-0.900559	0.032	0.765	1.22705e-32
FOXP1	1.83881e-31	-0.905165	0.137	0.87	3.97238e-27
FERMT2	4.68253e-32	-0.905979	0.081	0.791	1.01157e-27
TNFAIP3	5.72533e-25	-0.906068	0.081	0.695	1.23684e-20
PAPPA	9.90399e-17	-0.908955	0.234	0.78	2.13956e-12
RNA45S5	1.1132e-24	-0.910354	0.25	0.897	2.40485e-20
PHIP	2.39709e-33	-0.910845	0.04	0.741	5.17844e-29
INHBA	3.10841e-17	-0.91092	0.298	0.873	6.71511e-13
NR2F2	2.604e-21	-0.913387	0.315	0.943	5.62543e-17
SLC16A3	7.19052e-27	-0.921748	0.081	0.714	1.55337e-22
CCDC80	8.25252e-09	-0.929491	0.653	0.892	0.000178279
RNF145	9.76357e-29	-0.933735	0.065	0.716	2.10922e-24
GARS	5.88505e-28	-0.934416	0.258	0.932	1.27135e-23
ZFAND5	1.03551e-28	-0.940757	0.185	0.908	2.23702e-24
NR1D1	8.91319e-19	-0.941073	0.105	0.613	1.92552e-14
ZFP36	2.13682e-25	-0.941126	0.024	0.6	4.61618e-21
AHR	2.39233e-30	-0.94303	0.113	0.824	5.16815e-26
LDHA	9.98803e-14	-0.951644	0.476	0.982	2.15771e-09
WAC	1.08567e-36	-0.953417	0.081	0.851	2.34536e-32
TPBG	3.06846e-33	-0.953449	0.073	0.796	6.6288e-29
LRRC32	2.51831e-33	-0.954275	0.032	0.727	5.4403e-29
EIF4A3	2.16799e-32	-0.972021	0.065	0.778	4.6835e-28
NFIL3	2.12018e-31	-0.972996	0.048	0.719	4.58023e-27
BNIP3	1.76874e-16	-0.977872	0.258	0.804	3.821e-12
SOX4	1.66156e-24	-0.981248	0.218	0.89	3.58946e-20
BCL6	3.55057e-27	-0.984755	0.016	0.604	7.6703e-23
HERPUD1	6.8129e-32	-0.98588	0.081	0.791	1.47179e-27
TGFBR3	1.21742e-27	-0.985983	0.081	0.727	2.62999e-23
EIF4H	3.92185e-22	-0.990785	0.306	0.925	8.47237e-18
UBE2D3	1.77093e-30	-0.997961	0.218	0.927	3.82575e-26
WSB1	4.32062e-31	-0.999501	0.121	0.851	9.33384e-27
ATP13A3	5.50145e-17	-1.00308	0.29	0.873	1.18848e-12
UGCG	7.53555e-30	-1.00689	0.121	0.826	1.62791e-25
FRMD6	7.13773e-35	-1.01335	0.032	0.749	1.54196e-30
CXCL2	1.12254e-15	-1.01939	0.113	0.571	2.42501e-11
ATF4	1.97215e-24	-1.02008	0.411	0.963	4.26044e-20
SERPINE1	6.90352e-08	-1.02116	0.476	0.914	0.00149137
PNRC1	4.78495e-26	-1.02123	0.234	0.932	1.03369e-21
PTX3	2.92696e-14	-1.02738	0.282	0.778	6.32311e-10
MEG3	5.34203e-26	-1.0362	0.202	0.873	1.15404e-21
IL6	2.95268e-10	-1.03679	0.161	0.532	6.37867e-06
MFAP4	1.93608e-16	-1.0438	0.524	0.919	4.1825e-12
FAM162A	5.45998e-18	-1.06576	0.137	0.646	1.17952e-13
CA12	2.73308e-25	-1.06741	0.169	0.831	5.90428e-21
MAFG	1.62556e-34	-1.07094	0.081	0.835	3.5117e-30
LRRFIP1	4.51902e-24	-1.07469	0.274	0.914	9.76244e-20
CDKN1A	3.34543e-26	-1.08005	0.25	0.921	7.22712e-22
PPP1R15A	7.86708e-33	-1.09581	0.097	0.835	1.69953e-28
ABL2	3.66794e-34	-1.09918	0.016	0.708	7.92385e-30
SRSF11	5.84439e-33	-1.10266	0.161	0.903	1.26256e-28
WDR45B	4.61562e-27	-1.1027	0.177	0.866	9.97112e-23
PDGFRA	2.48509e-20	-1.10299	0.323	0.875	5.36854e-16
LOX	1.18987e-13	-1.11637	0.427	0.947	2.57047e-09
UBC	4.74308e-28	-1.12363	0.484	0.98	1.02465e-23
LUC7L3	1.5355e-32	-1.12611	0.129	0.853	3.31713e-28
KLF6	8.73803e-31	-1.13485	0.161	0.868	1.88768e-26
CEBPD	1.52335e-25	-1.1382	0.153	0.804	3.29089e-21
ZNF503	5.89887e-32	-1.15035	0.073	0.765	1.27433e-27
SLC38A2	6.56666e-25	-1.15491	0.363	0.965	1.4186e-20
ZFP36L1	1.02964e-22	-1.15853	0.331	0.956	2.22432e-18
DDIT4	2.58447e-28	-1.19911	0.105	0.782	5.58322e-24
CYR61	3.65424e-19	-1.20687	0.169	0.727	7.89426e-15
NFKBIA	7.33223e-29	-1.20924	0.177	0.875	1.58398e-24
NDRG1	1.37377e-18	-1.21061	0.185	0.745	2.96776e-14
LOXL2	2.78012e-23	-1.21726	0.298	0.938	6.0059e-19
LINC01279	7.22186e-15	-1.21864	0.282	0.727	1.56014e-10
SRRM2	1.94988e-38	-1.23455	0.137	0.925	4.21233e-34
JUN	5.03115e-31	-1.24736	0.153	0.855	1.08688e-26
SLC2A3	3.52576e-18	-1.26828	0.048	0.51	7.61669e-14
INSIG1	2.6096e-17	-1.27607	0.121	0.609	5.63752e-13
SQSTM1	8.40128e-26	-1.2804	0.427	0.982	1.81493e-21
HSPA5	3.72246e-24	-1.31354	0.524	0.982	8.04163e-20
RBPJ	1.06738e-32	-1.34502	0.161	0.881	2.30587e-28
STC2	2.07724e-28	-1.3538	0.419	0.969	4.48746e-24
ENO2	7.08325e-08	-1.44532	0.218	0.497	0.00153019
C11orf96	6.18406e-26	-1.45576	0.258	0.897	1.33594e-21
BHLHE40	2.90477e-13	-1.54458	0.121	0.514	6.27517e-09
ERO1A	1.25482e-16	-1.54876	0.25	0.778	2.71079e-12
PTGS2	6.28259e-20	-1.54886	0.137	0.662	1.35723e-15
CXCL8	4.71582e-12	-1.66702	0.331	0.776	1.01876e-07
VEGFA	3.06927e-24	-1.74938	0.298	0.936	6.63055e-20
RND3	1.02837e-36	-1.77341	0.185	0.93	2.22158e-32
HILPDA	1.22618e-14	-1.98114	0.048	0.44	2.64891e-10
NEAT1	1.11917e-31	-2.02145	0.661	0.993	2.41774e-27
ADM	7.39251e-18	-2.08469	0.113	0.593	1.597e-13
MALAT1	1.43493e-30	-2.25585	0.919	0.998	3.09989e-26
IER3	3.53945e-31	-2.42286	0.298	0.947	7.64628e-27
CEP152	1.11513e-18	-2.64822	0.194	0.736	2.40901e-14

## Sheet: DEG Cluster6 caf
GENES	p_val	avg_log2FC	pct.1	pct.2	p_val_adj
CEP152	6.15964e-50	4.30411	0.935	0.522	1.33067e-45
HILPDA	1.29763e-63	3.54674	0.855	0.2	2.80327e-59
ENO2	1.13282e-78	3.49797	0.978	0.268	2.44723e-74
ERO1A	1.30339e-67	3.38729	0.986	0.565	2.81571e-63
ADM	1.05583e-45	3.36515	0.855	0.376	2.28091e-41
BHLHE40	1.6764e-63	3.10208	0.906	0.281	3.62154e-59
IER3	1.75329e-43	3.0551	0.949	0.764	3.78763e-39
VEGFA	2.70133e-62	3.03437	0.986	0.741	5.83568e-58
LOX	1.70998e-54	2.86769	0.978	0.791	3.69407e-50
NPTX1	2.17528e-45	2.81207	0.507	0.029	4.69926e-41
CXCL8	1.43453e-10	2.67209	0.775	0.651	3.09902e-06
NDRG1	2.84273e-52	2.66877	0.92	0.533	6.14115e-48
GAPDH	3.48697e-60	2.63097	1	0.986	7.53289e-56
SERPINE1	1.98343e-42	2.5704	0.949	0.78	4.2848e-38
INSIG1	3.59061e-52	2.56399	0.891	0.383	7.7568e-48
BNIP3	5.10539e-55	2.43752	0.942	0.608	1.10292e-50
SLC2A3	2.57163e-49	2.38733	0.812	0.286	5.55549e-45
SCD	2.59257e-48	2.29818	0.942	0.726	5.60073e-44
MALAT1	7.75921e-39	2.29259	0.993	0.977	1.67622e-34
FAM162A	2.19108e-51	2.2776	0.884	0.429	4.7334e-47
ALDOA	2.12243e-56	2.2478	0.986	0.875	4.58509e-52
PTGS2	9.16832e-26	2.17884	0.783	0.476	1.98063e-21
MSMO1	2.238e-40	2.17684	0.862	0.531	4.83475e-36
STC1	7.99764e-21	2.13704	0.645	0.261	1.72773e-16
ATP13A3	7.09986e-43	2.13597	0.913	0.696	1.53378e-38
RBPJ	2.53372e-43	2.0146	0.92	0.667	5.47361e-39
WDR45B	2.85668e-47	2.00252	0.92	0.655	6.17128e-43
CA12	1.97964e-30	1.95866	0.87	0.633	4.27662e-26
ALDOC	3.54967e-60	1.90966	0.79	0.132	7.66836e-56
NEAT1	1.88956e-32	1.906	0.993	0.9	4.08202e-28
LOXL2	3.00971e-38	1.89543	0.935	0.76	6.50187e-34
GSN-AS1	1.84621e-42	1.8772	0.514	0.045	3.98837e-38
LDHA	2.27095e-43	1.84765	0.971	0.844	4.90593e-39
P4HA1	9.16585e-44	1.84112	0.913	0.698	1.9801e-39
NR1D1	1.56802e-35	1.81495	0.797	0.413	3.3874e-31
RND3	5.24125e-32	1.75166	0.906	0.728	1.13227e-27
DDIT4	1.76013e-14	1.74638	0.761	0.599	3.80241e-10
TM4SF1	6.78924e-27	1.71437	0.804	0.54	1.46668e-22
VKORC1	5.13078e-43	1.68316	0.957	0.807	1.1084e-38
LMAN1	3.21198e-47	1.67662	0.949	0.816	6.93885e-43
MMP1	8.24739e-20	1.67266	0.884	0.685	1.78168e-15
UGCG	4.24596e-30	1.6654	0.848	0.621	9.17254e-26
PLOD2	7.65117e-29	1.62345	0.92	0.812	1.65288e-24
ERRFI1	3.15374e-15	1.60615	0.609	0.376	6.81303e-11
TWIST1	6.77979e-27	1.58593	0.746	0.474	1.46464e-22
TINAGL1	8.20634e-36	1.54722	0.703	0.213	1.77281e-31
CKS2	5.14758e-23	1.52843	0.594	0.24	1.11203e-18
RNF145	9.69231e-32	1.5243	0.797	0.508	2.09383e-27
MAFG	3.05003e-27	1.52216	0.826	0.626	6.58898e-23
COL4A2	2.89088e-27	1.51507	0.899	0.769	6.24516e-23
C11orf96	8.53553e-13	1.51499	0.826	0.739	1.84393e-08
LINC01057	7.23625e-51	1.50472	0.971	0.442	1.56325e-46
PGK1	2.35108e-29	1.49088	0.891	0.794	5.07904e-25
METRNL	6.75381e-31	1.48775	0.804	0.506	1.45903e-26
MRPS6	2.09907e-21	1.4793	0.732	0.472	4.53462e-17
GJA1	6.99986e-27	1.46387	0.804	0.506	1.51218e-22
HK2	1.09855e-31	1.46384	0.674	0.236	2.3732e-27
PLAUR	3.2114e-22	1.44228	0.862	0.694	6.93758e-18
SLC6A6	4.18826e-43	1.44185	0.638	0.118	9.04791e-39
TGFBI	3.85144e-37	1.44009	0.986	0.884	8.32026e-33
LRRFIP1	4.11233e-26	1.42914	0.877	0.746	8.88387e-22
P4HA2	8.5391e-25	1.42806	0.819	0.685	1.8447e-20
BCAR1	1.66646e-24	1.42056	0.688	0.395	3.60006e-20
RYBP	1.93823e-16	1.41071	0.696	0.483	4.18717e-12
SQLE	4.83817e-23	1.4041	0.681	0.354	1.04519e-18
SLC16A3	4.48735e-22	1.40166	0.725	0.533	9.69402e-18
MYADM	1.44361e-25	1.39868	0.804	0.567	3.11862e-21
LINC-PINT	1.76346e-31	1.38697	0.674	0.249	3.80961e-27
TMSB10	8.19258e-37	1.38592	1	0.973	1.76984e-32
BCL6	3.88926e-27	1.38482	0.725	0.401	8.40196e-23
ALKBH5	4.23915e-31	1.37469	0.855	0.644	9.15783e-27
LDLR	7.60843e-14	1.36904	0.674	0.492	1.64365e-09
TBX3	1.78691e-20	1.36778	0.71	0.494	3.86026e-16
CLK1	5.5987e-32	1.36551	0.725	0.322	1.20949e-27
WSB1	7.78002e-21	1.35207	0.819	0.655	1.68072e-16
PHF1	1.71544e-28	1.34213	0.775	0.483	3.70587e-24
NINJ1	1.58027e-18	1.32775	0.63	0.356	3.41386e-14
C3orf58	7.05934e-24	1.31922	0.71	0.383	1.52503e-19
MXI1	8.5517e-31	1.31538	0.833	0.553	1.84742e-26
PFKFB3	3.85577e-29	1.31357	0.558	0.147	8.32962e-25
RAB3B	1.90708e-32	1.31129	0.746	0.302	4.11986e-28
SLC2A1	3.75797e-44	1.30594	0.681	0.143	8.11833e-40
ABL2	3.30234e-17	1.30364	0.717	0.51	7.13404e-13
F3	2.7325e-24	1.30202	0.623	0.265	5.90301e-20
POFUT2	4.97492e-34	1.29837	0.775	0.397	1.07473e-29
GBE1	7.40918e-25	1.29428	0.812	0.596	1.6006e-20
HLA-E	7.97018e-36	1.28041	0.935	0.744	1.7218e-31
TIMP1	5.17649e-34	1.26374	1	0.984	1.11828e-29
MAFF	3.44541e-31	1.25635	0.804	0.422	7.44312e-27
EIF4H	1.53217e-16	1.25226	0.833	0.78	3.30996e-12
HSPA5	7.94898e-09	1.2459	0.964	0.859	0.000171722
UBR4	1.18089e-25	1.24571	0.841	0.637	2.55107e-21
PGF	2.75766e-36	1.24562	0.413	0.025	5.95736e-32
MASP1	4.51208e-10	1.24521	0.645	0.583	9.74745e-06
COL12A1	5.77145e-19	1.2433	0.855	0.776	1.24681e-14
KCMF1	2.67926e-22	1.24212	0.746	0.54	5.788e-18
BNIP3L	7.61388e-29	1.2415	0.942	0.862	1.64483e-24
BRI3	4.46411e-32	1.23987	0.92	0.762	9.64382e-28
PRELP	1.33414e-09	1.23613	0.601	0.472	2.88215e-05
PEG10	1.35086e-05	1.2359	0.58	0.517	0.291827
COL4A1	1.28122e-16	1.22889	0.812	0.653	2.76782e-12
LRRC32	3.35243e-12	1.22654	0.674	0.549	7.24224e-08
HLA-A	1.94203e-37	1.22417	0.986	0.932	4.19538e-33
MSANTD3	7.60825e-25	1.22171	0.761	0.499	1.64361e-20
PNISR	6.58032e-22	1.21761	0.848	0.707	1.42155e-17
MEG3	9.34663e-20	1.2159	0.841	0.694	2.01915e-15
STARD4	2.26282e-27	1.21575	0.732	0.401	4.88836e-23
BASP1	7.52057e-26	1.20334	0.899	0.717	1.62467e-21
MME	5.98755e-18	1.20219	0.674	0.388	1.29349e-13
SMS	7.31301e-23	1.20147	0.797	0.59	1.57983e-18
SLC5A3	8.28086e-17	1.19409	0.638	0.388	1.78891e-12
PDK1	4.32085e-41	1.19346	0.645	0.134	9.33433e-37
KCNE4	2.40765e-08	1.19129	0.667	0.612	0.000520124
LYZ	1.09465e-54	1.18738	0.71	0.073	2.36477e-50
SMTN	1.69581e-24	1.18483	0.638	0.295	3.66346e-20
INHBA	9.01812e-10	1.17821	0.804	0.732	1.94818e-05
PAG1	2.1862e-19	1.16392	0.572	0.265	4.72284e-15
EIF4A3	2.45518e-07	1.16314	0.674	0.61	0.00530393
SNHG12	5.54714e-19	1.16164	0.616	0.317	1.19835e-14
TIMP3	9.04583e-17	1.15579	0.688	0.413	1.95417e-12
IL6	0.082972	1.15416	0.355	0.483	1
BTAF1	9.00448e-20	1.1516	0.63	0.358	1.94524e-15
IFRD1	2.84255e-25	1.15146	0.746	0.458	6.14075e-21
COPS2	2.72201e-26	1.14932	0.848	0.646	5.88036e-22
PPP1R18	1.67475e-20	1.14277	0.819	0.71	3.61796e-16
FDFT1	2.96235e-19	1.13814	0.754	0.524	6.39956e-15
GOLGA4	1.33185e-20	1.13738	0.804	0.707	2.8772e-16
MGEA5	5.47529e-20	1.13377	0.703	0.488	1.18283e-15
HIST1H1C	3.98665e-12	1.13355	0.623	0.399	8.61235e-08
JMJD6	7.71566e-31	1.13008	0.688	0.279	1.66681e-26
EIF1	2.99672e-40	1.12958	1	0.946	6.47382e-36
CYP51A1	1.43747e-15	1.12676	0.746	0.583	3.10536e-11
RICTOR	1.64006e-20	1.12622	0.645	0.374	3.54303e-16
MT2A	1.18649e-15	1.11865	0.957	0.925	2.56317e-11
HMGCS1	1.34516e-10	1.11038	0.471	0.268	2.90594e-06
P4HB	5.5649e-42	1.10312	0.993	0.927	1.20219e-37
ELL2	2.9413e-22	1.09849	0.833	0.649	6.35409e-18
NFIL3	3.5872e-16	1.09695	0.717	0.531	7.74944e-12
PIM3	6.70851e-23	1.0929	0.594	0.238	1.44924e-18
PLOD1	6.50546e-22	1.09158	0.848	0.728	1.40537e-17
MT-RNR1	2.05628e-30	1.08839	1	0.998	4.44218e-26
GPRC5A	9.74053e-16	1.08765	0.442	0.163	2.10425e-11
INSIG2	5.28406e-25	1.08533	0.58	0.206	1.14152e-20
RBPMS	4.44581e-21	1.08129	0.841	0.71	9.60429e-17
FAM13A	8.66881e-19	1.07573	0.594	0.306	1.87272e-14
CNOT8	9.74255e-21	1.07272	0.638	0.342	2.10468e-16
TPI1	1.94609e-23	1.07101	0.906	0.839	4.20414e-19
MYO9B	3.87397e-17	1.06668	0.71	0.537	8.36893e-13
ATP1B3	6.62234e-13	1.06605	0.783	0.705	1.43062e-08
FER1L4	1.31493e-33	1.05235	0.507	0.082	2.84064e-29
BTG1	2.35107e-20	1.05174	0.877	0.662	5.07903e-16
IDI1	3.19977e-09	1.04964	0.58	0.433	6.91247e-05
HHLA2	3.76669e-39	1.04928	0.797	0.24	8.13718e-35
PTPRF	4.80156e-23	1.04722	0.667	0.34	1.03728e-18
BTG3	2.77699e-27	1.04603	0.754	0.413	5.99912e-23
OSMR	2.85746e-19	1.0343	0.812	0.66	6.17297e-15
NFKBIA	2.9731e-07	1.03238	0.797	0.703	0.0064228
PJA2	1.12653e-20	1.03133	0.819	0.692	2.43365e-16
SIAH2	1.33296e-20	1.02946	0.616	0.304	2.8796e-16
C4orf3	1.53294e-14	1.02651	0.797	0.689	3.31162e-10
GPI	5.31678e-22	1.02593	0.819	0.651	1.14858e-17
SNHG7	2.98457e-22	1.02047	0.79	0.599	6.44756e-18
CRADD	1.61887e-19	1.00999	0.457	0.143	3.49725e-15
ITGB1	1.08004e-29	1.00739	0.993	0.973	2.3332e-25
CSRNP1	1.12849e-18	1.00411	0.543	0.229	2.43788e-14
DCLK2	2.66314e-24	1.00158	0.471	0.113	5.75318e-20
TMEM158	1.63554e-16	1.00049	0.949	0.848	3.53326e-12
GDI1	2.83568e-22	0.998264	0.833	0.655	6.12591e-18
MAP2K1	2.28346e-14	0.993534	0.688	0.528	4.93295e-10
ZBTB43	4.98539e-18	0.990887	0.594	0.308	1.07699e-13
KDELR3	3.95017e-14	0.989409	0.746	0.68	8.53355e-10
SLC6A8	2.03127e-22	0.987821	0.594	0.243	4.38816e-18
FGFR1OP2	3.25106e-15	0.986984	0.63	0.397	7.02326e-11
SEC24A	9.46219e-25	0.986479	0.674	0.329	2.04412e-20
MYO10	1.38331e-12	0.985062	0.645	0.478	2.98836e-08
CCNI	2.79331e-21	0.979943	0.899	0.825	6.03438e-17
HMGA2	5.75677e-22	0.979006	0.536	0.188	1.24364e-17
TUBA4A	6.3072e-28	0.976273	0.543	0.147	1.36254e-23
TMED9	5.87788e-19	0.974074	0.826	0.739	1.2698e-14
VAMP2	4.36178e-11	0.972588	0.804	0.703	9.42276e-07
HLA-B	2.82035e-22	0.970233	0.986	0.873	6.0928e-18
EIF1B	3.76236e-15	0.966772	0.71	0.533	8.12782e-11
RAB11FIP5	9.86801e-19	0.966595	0.659	0.422	2.13179e-14
VDAC1	3.02651e-20	0.963681	0.87	0.78	6.53817e-16
GOLGA2	1.52679e-15	0.961759	0.725	0.596	3.29833e-11
UBE2R2	6.19802e-20	0.960428	0.826	0.673	1.33896e-15
NUP58	3.53713e-15	0.956982	0.58	0.338	7.64127e-11
ZFAND5	7.40468e-18	0.956781	0.862	0.719	1.59963e-13
SRP54	5.11609e-14	0.955686	0.696	0.531	1.10523e-09
FAM219A	2.0318e-20	0.955263	0.565	0.236	4.3893e-16
CREBRF	1.10033e-15	0.952779	0.717	0.492	2.37705e-11
EMP1	9.16071e-12	0.951879	0.703	0.537	1.97899e-07
GSDMB	1.49323e-22	0.95	0.565	0.206	3.22582e-18
SMAP1	7.34005e-16	0.94676	0.638	0.424	1.58567e-11
NGLY1	2.69144e-17	0.944717	0.551	0.265	5.81431e-13
CLK3	3.17757e-22	0.943381	0.652	0.338	6.86451e-18
FAM63B	4.06475e-14	0.931589	0.645	0.438	8.78109e-10
FAM210A	5.28654e-20	0.929344	0.572	0.252	1.14205e-15
CD44	3.4875e-25	0.9288	0.957	0.875	7.53404e-21
CSGALNACT2	4.92099e-14	0.927287	0.645	0.467	1.06308e-09
PTTG1IP	6.64465e-11	0.923927	0.862	0.778	1.43544e-06
CEMIP	1.85503e-12	0.923847	0.536	0.263	4.00743e-08
SDC2	1.21625e-11	0.923207	0.703	0.578	2.62746e-07
LBH	4.0185e-05	0.91811	0.514	0.451	0.868116
CAMK2N1	5.32255e-10	0.91407	0.587	0.424	1.14983e-05
DGKH	6.83251e-16	0.913808	0.587	0.351	1.47603e-11
VDAC2	2.35541e-14	0.910712	0.804	0.721	5.0884e-10
CLEC2B	3.14191e-09	0.909097	0.428	0.243	6.78746e-05
SETD5	6.81782e-16	0.907989	0.732	0.571	1.47285e-11
CD9	9.486e-19	0.905139	0.797	0.585	2.04926e-14
MIR100HG	3.37784e-17	0.898085	0.732	0.556	7.29715e-13
FERMT2	1.48069e-12	0.897032	0.746	0.605	3.19874e-08
MT-RNR2	3.51734e-25	0.896775	1	1	7.5985e-21
KLF7	1.3729e-14	0.894784	0.623	0.395	2.96587e-10
SEC61G	7.91219e-21	0.893091	0.899	0.748	1.70927e-16
PIK3C2A	3.41555e-12	0.892987	0.645	0.469	7.37861e-08
TAF1D	1.38909e-18	0.891399	0.688	0.424	3.00085e-14
SRSF11	7.64574e-15	0.882384	0.833	0.717	1.65171e-10
NPEPPS	6.47716e-18	0.880812	0.819	0.687	1.39926e-13
ICAM5	1.50019e-26	0.878407	0.42	0.066	3.24085e-22
GOLT1B	4.52819e-15	0.876585	0.754	0.628	9.78225e-11
BAZ2A	4.35388e-17	0.875692	0.732	0.54	9.40569e-13
PATL1	6.84471e-10	0.873992	0.768	0.651	1.47866e-05
GABARAPL1	5.67319e-12	0.873428	0.63	0.456	1.22558e-07
PPP1R15A	8.39723e-06	0.868829	0.725	0.662	0.181405
SLC17A5	4.72758e-23	0.866909	0.58	0.218	1.0213e-18
CRKL	2.23442e-14	0.863897	0.645	0.46	4.82701e-10
SRSF1	6.5449e-11	0.86245	0.746	0.649	1.4139e-06
MPC2	1.65217e-13	0.860683	0.688	0.512	3.56918e-09
TFF3	8.12732e-54	0.860441	0.616	0.036	1.75575e-49
TPBG	4.96606e-09	0.860182	0.717	0.617	0.000107282
SLC22A17	3.60184e-13	0.859431	0.572	0.37	7.78106e-09
RNF126	3.64695e-19	0.858971	0.58	0.274	7.87851e-15
RIPK2	1.05422e-11	0.85758	0.594	0.397	2.27744e-07
GLRX	5.97693e-09	0.85758	0.761	0.698	0.00012912
CRABP2	2.33408e-16	0.857348	0.768	0.544	5.04232e-12
CBLB	5.52441e-09	0.854889	0.594	0.465	0.000119344
MSL1	2.20943e-13	0.854057	0.732	0.619	4.77303e-09
PFDN5	2.06762e-19	0.848299	0.862	0.782	4.46667e-15
LAMB2	6.03782e-14	0.844548	0.797	0.678	1.30435e-09
MTSS1	8.56995e-14	0.842107	0.529	0.281	1.85137e-09
FNBP4	4.56845e-18	0.841059	0.71	0.474	9.86923e-14
BRD2	6.27539e-10	0.838697	0.739	0.662	1.35567e-05
IMPAD1	1.41082e-13	0.838069	0.841	0.755	3.04779e-09
SSR3	3.50308e-19	0.835283	0.862	0.787	7.5677e-15
MICA	9.44726e-21	0.834359	0.558	0.22	2.04089e-16
KDELR1	1.72395e-16	0.833614	0.826	0.794	3.72425e-12
CSTB	2.43233e-09	0.833257	0.826	0.785	5.25456e-05
CTSB	4.41308e-26	0.832429	0.957	0.905	9.53357e-22
YEATS2	1.68405e-10	0.831038	0.486	0.29	3.63804e-06
RNA45S5	9.11626e-08	0.82879	0.826	0.737	0.00196939
FBXO42	3.13559e-13	0.825451	0.58	0.347	6.77382e-09
RNASE4	5.16783e-16	0.824964	0.543	0.263	1.11641e-11
KDM3A	3.11396e-13	0.824195	0.522	0.277	6.72708e-09
LGALS1	2.44465e-20	0.817438	1	0.957	5.28117e-16
FGFR1	4.71087e-13	0.817093	0.768	0.637	1.01769e-08
GNA13	1.74752e-10	0.815769	0.725	0.608	3.77516e-06
SERP1	4.74878e-15	0.815089	0.862	0.744	1.02588e-10
SPRY4	5.13748e-07	0.806768	0.406	0.249	0.0110985
RSBN1	2.47519e-22	0.806297	0.572	0.229	5.34714e-18
TMF1	3.19247e-11	0.804934	0.674	0.556	6.89669e-07
UAP1	1.39234e-11	0.803615	0.58	0.385	3.00788e-07
PLEKHA2	1.71057e-13	0.803323	0.609	0.385	3.69535e-09
DDX3Y	3.17996e-10	0.797892	0.681	0.567	6.86967e-06
PNPLA8	3.78266e-10	0.79712	0.63	0.501	8.17168e-06
YTHDC1	4.7332e-11	0.793531	0.652	0.494	1.02251e-06
SERPING1	0.00572568	0.792754	0.275	0.204	1
SPINT2	7.4361e-36	0.791385	0.674	0.15	1.60642e-31
CSRP2	3.58771e-17	0.790974	0.667	0.379	7.75054e-13
TIPARP	2.04164e-10	0.788177	0.522	0.322	4.41056e-06
NR4A1	2.90307e-17	0.78815	0.58	0.249	6.27149e-13
CELF1	5.17518e-13	0.787121	0.775	0.635	1.11799e-08
RNMT	4.42e-15	0.786732	0.572	0.333	9.54853e-11
AK2	8.15249e-12	0.785938	0.725	0.567	1.76118e-07
MYDGF	1.33857e-14	0.78545	0.841	0.803	2.89172e-10
SRRM1	3.52973e-11	0.782295	0.638	0.492	7.62527e-07
CCNL1	9.12754e-11	0.779573	0.703	0.558	1.97182e-06
CDR2	6.48722e-12	0.779532	0.558	0.347	1.40144e-07
ANGPTL4	8.10834e-24	0.776221	0.399	0.073	1.75164e-19
ZFP36L1	1.23881e-06	0.771652	0.877	0.805	0.0267621
ELP2	5.5642e-09	0.765663	0.594	0.463	0.000120203
SREBF2	3.62607e-06	0.765506	0.645	0.585	0.0783341
NMB	1.38299e-10	0.764445	0.312	0.104	2.98768e-06
LACTB	4.16073e-12	0.763649	0.565	0.374	8.98842e-08
SLC25A36	1.38641e-13	0.76333	0.696	0.546	2.99505e-09
COPB1	1.13308e-13	0.758712	0.804	0.692	2.44778e-09
HNRNPH1	3.27533e-09	0.757663	0.725	0.639	7.07571e-05
UBE2B	5.22234e-17	0.752631	0.826	0.676	1.12818e-12
PGAM1	1.31085e-08	0.752565	0.732	0.673	0.000283183
TUBB	1.18228e-12	0.751411	0.913	0.866	2.55408e-08
SAT1	6.36625e-08	0.74993	0.746	0.683	0.0013753
ADAM9	4.44281e-13	0.749333	0.768	0.655	9.5978e-09
MED10	8.78743e-10	0.748959	0.572	0.408	1.89835e-05
FNIP2	1.48895e-07	0.747762	0.478	0.311	0.00321658
TRIP10	6.18524e-10	0.746123	0.732	0.646	1.3362e-05
GFPT1	1.66229e-10	0.741619	0.761	0.646	3.59106e-06
HLA-C	5.33658e-16	0.741215	0.957	0.907	1.15286e-11
DLGAP4	4.52204e-14	0.741101	0.804	0.673	9.76896e-10
SRRM2	3.95044e-13	0.7411	0.87	0.721	8.53415e-09
RHBDF1	5.46652e-05	0.740026	0.645	0.608	1
CHD2	1.68084e-10	0.739463	0.681	0.562	3.63113e-06
IL32	5.07182e-09	0.739366	0.522	0.351	0.000109567
TMBIM1	6.43114e-11	0.73907	0.725	0.612	1.38932e-06
SLC38A2	6.18178e-07	0.738841	0.92	0.81	0.0133545
IMP3	0.00334252	0.734814	0.522	0.515	1
ATF4	1.43432e-11	0.733737	0.913	0.823	3.09855e-07
PELO	9.47485e-09	0.732862	0.659	0.506	0.000204685
SLC35E1	2.47187e-11	0.731939	0.659	0.51	5.33997e-07
EGLN1	1.29658e-06	0.731895	0.529	0.415	0.02801
KDM5C	1.26377e-11	0.730106	0.659	0.501	2.73012e-07
EDIL3	1.12497e-09	0.724941	0.645	0.526	2.43027e-05
P4HA3	2.60041e-09	0.722547	0.58	0.399	5.61767e-05
VIM	1.76577e-22	0.722076	1	0.975	3.81459e-18
KRT8	1.49713e-11	0.719779	0.601	0.397	3.23425e-07
MARCH6	9.37996e-11	0.719623	0.754	0.628	2.02635e-06
RABGEF1	1.35138e-14	0.716814	0.536	0.272	2.91938e-10
ZNF207	3.82762e-09	0.714972	0.681	0.578	8.2688e-05
CNOT2	2.78621e-05	0.714561	0.681	0.63	0.601904
SERTAD2	5.42494e-09	0.712538	0.543	0.399	0.000117195
VEGFC	2.13236e-17	0.711857	0.551	0.256	4.60654e-13
EIF2A	3.96848e-11	0.711465	0.674	0.562	8.57311e-07
PPP2R5B	2.59425e-11	0.710123	0.507	0.283	5.60437e-07
GPR155	8.8047e-10	0.709366	0.464	0.265	1.90208e-05
LUC7L3	1.13208e-06	0.707124	0.739	0.685	0.0244562
RDH11	2.46206e-09	0.707	0.732	0.635	5.31879e-05
UBC	9.12487e-12	0.706857	0.942	0.853	1.97125e-07
CLN8	3.77038e-11	0.70548	0.572	0.376	8.14515e-07
FBL	3.79162e-05	0.705368	0.63	0.583	0.819103
APLP2	1.568e-24	0.705073	0.949	0.882	3.38735e-20
UBE2D3	1.23616e-14	0.702942	0.877	0.744	2.67047e-10
SPAG9	3.03829e-10	0.70138	0.725	0.619	6.56362e-06
SMIM3	3.44407e-10	0.701277	0.58	0.383	7.44022e-06
CD55	3.04624e-15	0.700238	0.732	0.533	6.5808e-11
DAB2IP	1.3434e-12	0.700182	0.5	0.268	2.90214e-08
RELA	1.07989e-05	0.696964	0.529	0.46	0.23329
LZTS2	2.10838e-08	0.695902	0.551	0.422	0.000455474
DKK3	2.88084e-13	0.695324	0.848	0.819	6.22347e-09
SLAIN2	4.01136e-12	0.694055	0.652	0.492	8.66574e-08
ETS2	3.01418e-15	0.692454	0.543	0.27	6.51154e-11
FEM1C	5.62689e-13	0.691836	0.558	0.338	1.21558e-08
KDM5B	1.27591e-09	0.689029	0.696	0.592	2.75634e-05
TFPI2	5.37593e-13	0.68796	0.986	0.948	1.16136e-08
DNAJB9	2.93542e-05	0.685263	0.572	0.531	0.634139
SF3B2	1.25081e-05	0.685246	0.703	0.667	0.270213
ANKRD10	9.14569e-07	0.683239	0.5	0.385	0.0197574
USP3	1.76177e-11	0.681173	0.551	0.345	3.80596e-07
HIVEP2	7.32797e-10	0.67685	0.558	0.367	1.58306e-05
TBC1D15	1.92379e-06	0.676816	0.514	0.399	0.0415597
GGNBP2	2.13237e-09	0.676317	0.688	0.603	4.60656e-05
UBE2O	2.02521e-13	0.67611	0.522	0.286	4.37506e-09
PRRC1	3.0283e-10	0.671594	0.681	0.549	6.54204e-06
GRINA	6.04842e-09	0.67106	0.79	0.728	0.000130664
RGS3	7.75939e-07	0.667876	0.413	0.256	0.0167626
FOSL2	3.93433e-07	0.667133	0.486	0.351	0.00849933
RAB8B	1.11396e-10	0.666803	0.63	0.472	2.40648e-06
TMEM165	5.90038e-07	0.665926	0.732	0.626	0.0127466
MEF2D	3.39572e-09	0.664936	0.594	0.463	7.33577e-05
TSLP	3.57896e-11	0.664007	0.449	0.22	7.73163e-07
TRIM33	4.12639e-05	0.662985	0.594	0.519	0.891424
ARL8B	3.36079e-07	0.662949	0.623	0.565	0.00726031
SOD3	4.98031e-11	0.662551	0.891	0.837	1.0759e-06
KRT10	1.38917e-08	0.66241	0.71	0.671	0.000300102
CDKN1C	1.15953e-05	0.660758	0.341	0.19	0.250494
C16orf13	1.53704e-09	0.660015	0.681	0.583	3.32047e-05
CEBPB	8.22777e-05	0.659128	0.812	0.744	1
CYR61	0.0222257	0.659128	0.471	0.651	1
ACSS2	0.0031067	0.657417	0.275	0.186	1
SAP30	2.19397e-11	0.65736	0.457	0.234	4.73964e-07
MAPK8IP3	6.66137e-14	0.656777	0.442	0.188	1.43906e-09
CCSAP	4.17382e-16	0.656337	0.348	0.088	9.01671e-12
ID2	0.0612205	0.655446	0.638	0.653	1
PTK2	5.79767e-07	0.654089	0.543	0.433	0.0125247
TSPAN13	1.09316e-16	0.649943	0.42	0.116	2.36155e-12
CRYBB2P1	3.49161e-11	0.649685	0.486	0.263	7.54293e-07
PERP	2.98057e-15	0.648975	0.746	0.542	6.43892e-11
JARID2	1.39245e-09	0.648451	0.478	0.299	3.0081e-05
DHX15	4.9506e-06	0.645761	0.616	0.542	0.106948
KCNK6	2.42951e-07	0.644932	0.478	0.32	0.00524847
VLDLR	3.25786e-11	0.644538	0.333	0.118	7.03795e-07
SPRY2	2.02578e-14	0.639441	0.42	0.156	4.37629e-10
USP53	1.74015e-10	0.638537	0.536	0.338	3.75925e-06
HELZ	6.93002e-07	0.63815	0.609	0.528	0.0149709
ZFC3H1	6.89599e-09	0.637295	0.587	0.44	0.000148974
SC5D	0.0218583	0.63717	0.449	0.449	1
GLTSCR2	1.12707e-09	0.6371	0.754	0.667	2.43481e-05
ABHD17C	1.52772e-07	0.63697	0.377	0.211	0.00330033
TMEM47	1.20384e-06	0.635379	0.768	0.689	0.0260066
SLC31A1	1.03439e-06	0.63537	0.594	0.494	0.0223459
TANC2	1.59565e-05	0.635295	0.522	0.426	0.344708
PAPD7	2.62148e-08	0.634655	0.413	0.231	0.000566317
IPMK	1.54389e-17	0.634346	0.464	0.152	3.33526e-13
PDLIM4	7.76641e-05	0.634267	0.638	0.601	1
EFNA3	1.06121e-28	0.633629	0.442	0.063	2.29252e-24
WBP2	1.60042e-11	0.633201	0.797	0.685	3.45739e-07
ACBD3	1.57935e-09	0.63208	0.623	0.517	3.41186e-05
SAFB2	5.42466e-05	0.631912	0.471	0.381	1
CACNB4	6.80218e-09	0.631061	0.268	0.091	0.000146948
DEGS1	0.000233521	0.63055	0.703	0.678	1
CCNG2	4.1242e-08	0.629984	0.551	0.392	0.000890951
ECM1	2.25659e-12	0.628839	0.841	0.789	4.87491e-08
AMPD3	8.38283e-13	0.628315	0.428	0.184	1.81094e-08
TMED3	4.78816e-10	0.628017	0.71	0.637	1.03439e-05
TOMM20	1.96293e-11	0.627989	0.783	0.676	4.24051e-07
FLNC	1.55326e-05	0.627694	0.645	0.594	0.33555
ANG	1.30289e-15	0.626464	0.355	0.091	2.81463e-11
FKBP10	2.74698e-14	0.624393	0.848	0.769	5.9343e-10
CDC42EP3	8.4714e-09	0.624144	0.529	0.345	0.000183008
HGS	2.70289e-06	0.621974	0.652	0.608	0.0583906
LIMS1	2.36442e-07	0.621948	0.746	0.683	0.00510786
NEDD4L	2.69606e-10	0.618033	0.442	0.24	5.8243e-06
ATP6V1A	5.10195e-07	0.617844	0.688	0.651	0.0110217
CDK5RAP3	2.47697e-06	0.616955	0.696	0.608	0.0535099
RIOK3	6.40352e-11	0.61178	0.616	0.454	1.38335e-06
SMURF2	6.13827e-06	0.609828	0.493	0.37	0.132605
TXNIP	0.241922	0.60759	0.558	0.63	1
MT-TV	5.24246e-11	0.607524	0.536	0.29	1.13253e-06
PHIP	6.94887e-05	0.607286	0.638	0.576	1
PLIN2	0.424324	0.606191	0.652	0.701	1
CARD19	5.04726e-07	0.606117	0.493	0.381	0.0109036
HNRNPC	9.40277e-12	0.604254	0.928	0.864	2.03128e-07
CEBPD	0.54831	0.604181	0.616	0.68	1
LXN	0.00185556	0.602135	0.616	0.587	1
RSRP1	1.07528e-05	0.602092	0.514	0.422	0.232292
ZRANB1	4.73531e-08	0.602062	0.616	0.501	0.00102297
ITGA5	2.50395e-07	0.601452	0.826	0.796	0.00540928
PPP2R2A	2.30982e-05	0.599734	0.58	0.531	0.498991
WAC	9.4636e-07	0.598916	0.739	0.669	0.0204442
IGFBP6	2.95433e-09	0.598555	0.862	0.834	6.38224e-05
ZNF581	5.09804e-11	0.597874	0.507	0.293	1.10133e-06
ZYX	2.6348e-09	0.596004	0.906	0.839	5.69197e-05
USP36	2.73478e-06	0.594915	0.478	0.363	0.0590795
UBR5	4.79762e-06	0.594802	0.616	0.551	0.103643
HOOK3	5.08792e-06	0.594502	0.659	0.603	0.109914
ING1	1.76124e-14	0.593175	0.435	0.172	3.8048e-10
FRMD6	0.00116234	0.591621	0.609	0.592	1
SLC38A5	5.30818e-10	0.589854	0.5	0.295	1.14673e-05
COL8A1	1.98377e-06	0.58979	0.696	0.617	0.0428554
ARFGAP1	2.14067e-08	0.588996	0.493	0.333	0.00046245
WDFY1	1.07488e-05	0.588339	0.514	0.438	0.232207
RASSF1	5.54449e-11	0.588253	0.514	0.317	1.19778e-06
RABAC1	1.6676e-07	0.588141	0.739	0.689	0.00360251
FAM117B	1.41573e-12	0.587306	0.355	0.118	3.0584e-08
APBB3	0.0175833	0.587303	0.37	0.324	1
COL18A1	9.75455e-07	0.586649	0.471	0.331	0.0210728
KDELR2	1.42868e-13	0.585641	0.935	0.841	3.08638e-09
LAPTM4A	4.13156e-10	0.585629	0.928	0.873	8.9254e-06
UCA1	2.89874e-17	0.582086	0.522	0.197	6.26214e-13
ENO1	2.83452e-07	0.581631	0.928	0.887	0.00612342
NUPR1	0.0119018	0.580738	0.725	0.739	1
LRP1	1.38879e-10	0.580403	0.949	0.825	3.00021e-06
MT1L	3.28818e-12	0.579712	0.493	0.22	7.10346e-08
PSME4	3.45283e-06	0.579209	0.522	0.408	0.0745915
S100A4	5.001e-26	0.576228	0.543	0.129	1.08037e-21
CASC3	1.06315e-06	0.574814	0.674	0.642	0.0229671
NAV2	0.0217928	0.574205	0.362	0.32	1
NPTN-IT1	4.00399e-23	0.573862	0.42	0.086	8.64982e-19
PTMA	2.20247e-08	0.573719	0.942	0.923	0.0004758
BCL9L	1.38105e-06	0.57249	0.681	0.63	0.0298348
ZBTB1	0.000220193	0.572177	0.5	0.433	1
SRPRA	0.000267494	0.571524	0.775	0.744	1
COL11A1	1.84958e-12	0.569304	0.362	0.122	3.99564e-08
SFXN1	5.64988e-09	0.569207	0.572	0.42	0.000122054
MAPKAPK2	2.82084e-08	0.569094	0.761	0.696	0.000609385
GARS	0.000250778	0.568622	0.848	0.769	1
MAPK6	1.76463e-08	0.568301	0.667	0.565	0.000381213
RASA2	2.92361e-09	0.567934	0.449	0.249	6.31588e-05
PFN1	4.43611e-05	0.567097	0.993	0.986	0.958333
ATXN2	4.58213e-05	0.566411	0.645	0.585	0.989877
TCEAL9	1.55202e-06	0.566167	0.797	0.712	0.0335283
HCFC1R1	1.09627e-08	0.565837	0.717	0.667	0.000236827
SYNGAP1	2.77385e-07	0.56482	0.413	0.254	0.00599235
CSNK2A1	5.12868e-07	0.562995	0.587	0.508	0.0110795
BACH1	1.38785e-06	0.562892	0.551	0.438	0.0299816
POU2F1	5.61046e-09	0.562186	0.493	0.297	0.000121203
SNRPA1	1.18839e-11	0.561779	0.543	0.317	2.56729e-07
LTBP4	0.000574362	0.561076	0.471	0.413	1
PAXBP1	1.43271e-06	0.561044	0.442	0.308	0.0309509
FXR1	1.01795e-08	0.55965	0.674	0.567	0.000219907
ZCCHC7	4.22376e-08	0.558353	0.478	0.317	0.000912458
TGFB1	3.3984e-10	0.557602	0.674	0.537	7.34156e-06
HRH1	3.39043e-06	0.557241	0.435	0.306	0.0732436
NPC1	1.44567e-08	0.556581	0.362	0.177	0.000312308
MORF4L2	0.000389556	0.555606	0.761	0.746	1
IRS2	7.88416e-08	0.554903	0.435	0.261	0.00170321
ALCAM	6.75589e-06	0.554597	0.652	0.583	0.145948
PIK3IP1	1.16853e-09	0.554529	0.391	0.184	2.52437e-05
PTGS1	6.07774e-07	0.554436	0.601	0.465	0.0131297
E2F7	5.05048e-05	0.553782	0.384	0.252	1
TNFRSF10D	1.86377e-08	0.5536	0.471	0.286	0.000402631
SNHG18	5.25157e-08	0.553319	0.522	0.383	0.0011345
CALU	4.59921e-13	0.552239	0.957	0.946	9.93568e-09
PDXDC1	1.61703e-07	0.549288	0.572	0.467	0.00349328
PPDPF	2.24429e-14	0.549266	0.928	0.88	4.84834e-10
NUCB1	2.33269e-11	0.549086	0.841	0.764	5.03932e-07
ATN1	6.44386e-07	0.549031	0.841	0.798	0.0139207
CSNK2B	1.40595e-08	0.548842	0.819	0.735	0.000303728
HDAC5	3.8844e-10	0.548089	0.558	0.37	8.39146e-06
KDM2A	2.98223e-06	0.54803	0.609	0.533	0.0644252
PHF21A	1.74257e-05	0.547693	0.493	0.39	0.376447
CRIM1	0.000768295	0.547469	0.543	0.497	1
NDEL1	5.71455e-08	0.547392	0.514	0.37	0.00123451
DENND5A	0.00727339	0.545057	0.565	0.571	1
MTSS1L	9.09252e-13	0.544506	0.464	0.209	1.96426e-08
CLDN12	3.23002e-06	0.54427	0.464	0.322	0.069778
LYST	8.28273e-06	0.544126	0.478	0.363	0.178932
AK4	1.26589e-18	0.543708	0.413	0.111	2.73469e-14
TKT	1.16553e-05	0.543009	0.652	0.624	0.25179
ELOVL5	0.014092	0.541743	0.543	0.556	1
MANBA	4.90034e-07	0.540616	0.609	0.497	0.0105862
PPP1R13L	3.9093e-16	0.53928	0.384	0.107	8.44526e-12
LSM12	0.000125176	0.539222	0.63	0.603	1
DUSP5	1.94321e-07	0.539166	0.406	0.236	0.00419792
UACA	0.647571	0.538118	0.63	0.723	1
KLHL24	1.45713e-07	0.537793	0.551	0.404	0.00314785
ELF3	8.8874e-18	0.537281	0.326	0.057	1.91994e-13
SUCO	1.00048e-06	0.53727	0.565	0.447	0.0216135
AAK1	1.17698e-06	0.535991	0.703	0.644	0.0254263
PPFIBP1	5.41513e-06	0.535566	0.594	0.483	0.116983
WASF2	5.59378e-07	0.534654	0.761	0.694	0.0120843
PGM2L1	6.71918e-05	0.533213	0.543	0.456	1
PDIA5	3.27499e-06	0.532171	0.507	0.395	0.0707497
PAICS	0.000144105	0.531976	0.623	0.58	1
JUND	2.39447e-07	0.531611	0.877	0.814	0.00517278
OSER1	2.2972e-05	0.528159	0.449	0.349	0.496264
NAB2	1.23221e-08	0.526969	0.391	0.206	0.000266194
UBA6	1.44403e-05	0.526018	0.507	0.424	0.311954
PAM	1.66487e-05	0.525399	0.768	0.746	0.359663
USP32	1.68985e-05	0.522717	0.464	0.345	0.365059
SREBF1	2.33728e-06	0.522272	0.486	0.347	0.0504923
SP3	1.95632e-05	0.521164	0.58	0.503	0.422625
DHCR7	0.000485347	0.520548	0.507	0.438	1
LRRFIP2	0.00153861	0.520419	0.5	0.472	1
HSPB8	0.0246996	0.519927	0.464	0.478	1
UBAP1	0.00297891	0.519804	0.565	0.556	1
REL	5.57651e-08	0.519758	0.413	0.224	0.00120469
SPTY2D1	9.26236e-06	0.518162	0.442	0.324	0.200095
PYGL	3.80909e-13	0.518111	0.493	0.231	8.22877e-09
EIF4A2	4.64478e-07	0.517857	0.804	0.764	0.0100341
PDXP	6.32152e-06	0.516415	0.399	0.263	0.136564
GABARAPL2	8.77941e-06	0.516379	0.725	0.678	0.189662
GNAI3	4.74743e-07	0.51503	0.688	0.61	0.0102559
WIPF2	5.66728e-06	0.514519	0.638	0.553	0.12243
SAT2	8.364e-09	0.51446	0.58	0.433	0.000180688
RAD21	1.95732e-05	0.514286	0.696	0.63	0.422839
NPRL2	1.90413e-06	0.514149	0.348	0.197	0.0411348
DNHD1	1.49738e-14	0.512404	0.304	0.07	3.2348e-10
DOT1L	9.0677e-09	0.511891	0.355	0.177	0.000195889
FOXP1	2.99574e-05	0.511633	0.783	0.692	0.647171
TMEM212	4.30056e-05	0.510632	0.674	0.596	0.92905
TGFBR3	0.00132528	0.510608	0.609	0.583	1
NOTCH3	0.000780236	0.510338	0.529	0.49	1
KLHL28	2.40014e-07	0.509489	0.457	0.29	0.00518501
ARGLU1	0.00634147	0.509454	0.536	0.535	1
SLC26A6	6.17903e-09	0.509444	0.413	0.218	0.000133486
DAPK3	3.07126e-05	0.509137	0.37	0.247	0.663485
SAMD8	2.06254e-07	0.506532	0.529	0.392	0.00445572
NKTR	5.83912e-05	0.506123	0.616	0.551	1
SFRP1	3.12423e-10	0.506034	0.862	0.794	6.74927e-06
CCBE1	5.85689e-06	0.504351	0.514	0.399	0.126526
CD24	6.94233e-14	0.503523	0.37	0.113	1.49975e-09
LTBP1	1.80662e-06	0.502903	0.826	0.794	0.0390284
ESRG	5.04975e-11	0.502442	0.522	0.27	1.0909e-06
RCN3	3.99825e-05	0.502364	0.761	0.766	0.863742
STEAP3	3.95368e-05	0.501689	0.384	0.256	0.854113
DDIT3	0.521198	0.500159	0.384	0.435	1
NAPA	1.63459e-16	-0.50039	0.196	0.626	3.53121e-12
SPATS2L	2.61927e-09	-0.500819	0.471	0.717	5.65841e-05
EMC4	3.98507e-12	-0.500955	0.283	0.642	8.60894e-08
TALDO1	1.21484e-13	-0.501678	0.167	0.544	2.62442e-09
IFIT3	5.86683e-18	-0.502001	0.087	0.526	1.26741e-13
REXO2	3.17051e-11	-0.503068	0.543	0.776	6.84925e-07
MFSD1	1.33043e-16	-0.504734	0.101	0.531	2.87412e-12
ALDH9A1	7.06541e-09	-0.505276	0.399	0.655	0.000152634
MOCS2	4.85393e-17	-0.505293	0.159	0.59	1.04859e-12
GPS1	3.36598e-14	-0.505342	0.203	0.59	7.27152e-10
FGD5-AS1	7.78323e-15	-0.505608	0.275	0.658	1.68141e-10
NOP56	3.28946e-13	-0.505677	0.196	0.571	7.10623e-09
ATP2B4	1.46416e-05	-0.506692	0.543	0.694	0.316302
APPL2	1.23642e-15	-0.507395	0.159	0.58	2.67104e-11
TIMM8B	9.57746e-22	-0.507441	0.051	0.526	2.06902e-17
GTF2H5	3.08071e-15	-0.507956	0.152	0.56	6.65526e-11
TNS3	3.7335e-13	-0.508285	0.203	0.576	8.06548e-09
AGPS	4.44418e-20	-0.509214	0.036	0.481	9.60077e-16
MEDAG	2.20824e-08	-0.509395	0.21	0.524	0.000477047
PA2G4	7.14927e-15	-0.509421	0.246	0.626	1.54446e-10
NUTF2	3.42904e-14	-0.509622	0.138	0.535	7.40777e-10
TMEM98	1.57579e-15	-0.511586	0.217	0.621	3.40419e-11
ENSA	2.59571e-16	-0.511753	0.188	0.617	5.60751e-12
PPCS	4.24473e-20	-0.512078	0.058	0.503	9.1699e-16
ANGPTL1	7.03786e-21	-0.512767	0.029	0.49	1.52039e-16
ATP5G3	2.30691e-09	-0.513165	0.428	0.696	4.98361e-05
COL6A3	5.81281e-07	-0.513357	0.884	0.916	0.0125574
MYO1D	1.51285e-11	-0.513923	0.239	0.605	3.2682e-07
TPGS2	1.91811e-12	-0.514083	0.268	0.639	4.14369e-08
HIF1A	1.43976e-08	-0.514174	0.297	0.565	0.000311032
FBLN2	1.27788e-06	-0.515538	0.246	0.492	0.027606
ZMYM4	2.17341e-13	-0.517354	0.196	0.546	4.69522e-09
SMARCA2	7.87173e-14	-0.517475	0.21	0.592	1.70053e-09
GPX4	2.74187e-09	-0.517504	0.768	0.873	5.92325e-05
HNMT	2.81081e-15	-0.517673	0.13	0.522	6.07219e-11
MT-ATP6	1.54799e-19	-0.518255	1	1	3.34413e-15
ANKRD11	4.89373e-10	-0.518334	0.5	0.719	1.05719e-05
OSBPL8	0.000228437	-0.51872	0.688	0.739	1
EMILIN1	4.72638e-09	-0.519047	0.543	0.751	0.000102104
CTDSP1	2.78869e-19	-0.519645	0.094	0.549	6.02441e-15
PDZD11	1.55023e-12	-0.521071	0.196	0.578	3.34897e-08
RAB5C	1.66413e-11	-0.52135	0.348	0.683	3.59501e-07
SRI	7.64457e-13	-0.521359	0.246	0.603	1.65146e-08
RPLP0	4.56321e-10	-0.522515	0.899	0.95	9.8579e-06
EIF6	3.32887e-13	-0.523371	0.283	0.667	7.19135e-09
MOB1A	6.59834e-10	-0.523426	0.391	0.667	1.42544e-05
JADE1	1.49111e-17	-0.523924	0.08	0.497	3.22125e-13
EFR3A	7.16433e-10	-0.524501	0.326	0.637	1.54771e-05
PPIA	3.11905e-09	-0.524999	0.949	0.975	6.73809e-05
ICMT	9.19007e-18	-0.526047	0.123	0.556	1.98533e-13
VPS29	4.32623e-18	-0.526218	0.123	0.553	9.34596e-14
NDUFB9	3.41297e-12	-0.527741	0.413	0.726	7.37304e-08
CDKN2A	1.43245e-11	-0.527802	0.203	0.558	3.09452e-07
TNFAIP2	6.19596e-13	-0.527981	0.297	0.673	1.33851e-08
STMN1	7.38749e-07	-0.528802	0.246	0.522	0.0159592
SMARCA4	2.34324e-16	-0.528822	0.188	0.585	5.0621e-12
ST3GAL1	3.08065e-07	-0.52984	0.522	0.717	0.00665512
KIDINS220	6.69454e-10	-0.530295	0.348	0.658	1.44622e-05
NID2	2.45636e-08	-0.530599	0.551	0.773	0.000530648
PBRM1	7.92e-18	-0.530845	0.116	0.546	1.71096e-13
MBTPS1	1.52196e-13	-0.530981	0.341	0.68	3.2879e-09
HIPK2	3.22086e-12	-0.531193	0.217	0.571	6.95803e-08
RAP2B	4.36046e-11	-0.531349	0.304	0.646	9.41991e-07
OCIAD1	4.97417e-13	-0.533619	0.384	0.701	1.07457e-08
SET	7.05037e-11	-0.533716	0.681	0.819	1.52309e-06
DPYSL2	2.40978e-09	-0.533995	0.703	0.841	5.20585e-05
CDC42	7.29377e-09	-0.534622	0.623	0.785	0.000157567
ZCCHC24	4.44404e-10	-0.534761	0.406	0.694	9.60046e-06
SMARCC2	3.34244e-11	-0.535153	0.355	0.662	7.22067e-07
NDUFB7	1.81814e-11	-0.535153	0.283	0.619	3.92773e-07
DCN	1.95966e-10	-0.535798	0.978	0.986	4.23344e-06
BCAT1	1.52303e-07	-0.536259	0.623	0.762	0.0032902
CHST14	6.25858e-20	-0.537457	0.072	0.528	1.35204e-15
MRPS7	1.76477e-19	-0.537775	0.065	0.508	3.81242e-15
CBX6	2.66282e-20	-0.538402	0.101	0.592	5.75249e-16
CCDC92	3.45504e-12	-0.538542	0.239	0.594	7.46392e-08
ROBO1	5.60798e-11	-0.539688	0.377	0.685	1.21149e-06
CYB561A3	1.74939e-19	-0.540814	0.094	0.551	3.77922e-15
PNPO	2.33562e-20	-0.540888	0.058	0.528	5.04563e-16
ALPK2	1.92295e-20	-0.541393	0.051	0.508	4.15415e-16
CAPN2	8.67829e-06	-0.542597	0.739	0.855	0.187477
ZMAT2	5.09537e-14	-0.542846	0.188	0.565	1.10075e-09
DENR	2.48798e-16	-0.543388	0.159	0.574	5.37479e-12
TMX3	4.40267e-10	-0.54371	0.406	0.653	9.51108e-06
ATMIN	2.55124e-19	-0.544468	0.101	0.54	5.51145e-15
EPB41L2	5.14345e-12	-0.545875	0.268	0.619	1.11114e-07
PPP3CA	1.37593e-09	-0.546018	0.471	0.712	2.97241e-05
EXTL2	5.8924e-18	-0.546385	0.094	0.535	1.27294e-13
GTF2H1	4.52119e-19	-0.54674	0.08	0.528	9.76713e-15
GLT8D2	7.18738e-14	-0.546878	0.261	0.655	1.55269e-09
PRNP	2.37045e-10	-0.549503	0.428	0.692	5.12089e-06
NEDD8	1.35535e-12	-0.54965	0.391	0.726	2.92795e-08
NDUFB2	6.10292e-18	-0.550641	0.188	0.605	1.31841e-13
STAT2	2.35784e-16	-0.55274	0.21	0.608	5.09365e-12
LIPA	5.86675e-20	-0.552768	0.094	0.571	1.26739e-15
TNFRSF1A	2.47741e-13	-0.552849	0.355	0.676	5.35195e-09
DDX1	1.14655e-15	-0.553153	0.217	0.619	2.47688e-11
RCN2	1.46123e-15	-0.553271	0.29	0.68	3.15669e-11
TCEAL4	2.1385e-12	-0.554473	0.275	0.626	4.61979e-08
YWHAE	2.22272e-10	-0.555124	0.79	0.893	4.80174e-06
SLC39A8	5.2372e-11	-0.555351	0.196	0.51	1.13139e-06
STRN4	1.72839e-10	-0.556269	0.37	0.685	3.73385e-06
LAPTM4B	9.58072e-14	-0.558041	0.232	0.621	2.06972e-09
SNF8	2.69592e-16	-0.559585	0.261	0.658	5.824e-12
ABHD4	4.1272e-11	-0.559941	0.341	0.678	8.916e-07
CCT2	7.47731e-12	-0.56046	0.406	0.687	1.61532e-07
GTF3C6	2.1366e-23	-0.562005	0.029	0.524	4.6157e-19
MYL12A	3.3859e-07	-0.56203	0.652	0.819	0.00731455
SLC35B1	3.52121e-15	-0.562084	0.232	0.617	7.60686e-11
COL15A1	5.09284e-10	-0.562539	0.254	0.576	1.10021e-05
SNX18	4.57057e-10	-0.562654	0.413	0.685	9.87381e-06
AK1	1.58879e-13	-0.563049	0.319	0.667	3.43227e-09
NAXE	1.27519e-20	-0.56428	0.058	0.512	2.7548e-16
ARHGDIB	1.63989e-15	-0.564373	0.058	0.444	3.54266e-11
WNT5A	6.81476e-08	-0.564459	0.319	0.578	0.00147219
RUNX1T1	2.14375e-18	-0.565964	0.051	0.485	4.63113e-14
EI24	1.18157e-11	-0.566063	0.37	0.671	2.55254e-07
TPM3	4.15755e-06	-0.566523	0.558	0.769	0.0898155
HUWE1	2.96828e-11	-0.566636	0.384	0.685	6.41238e-07
LAMA2	1.21211e-08	-0.568101	0.486	0.707	0.000261853
TOR1AIP1	8.74794e-17	-0.569133	0.188	0.612	1.88982e-12
EIF5	2.21577e-11	-0.571212	0.413	0.705	4.78672e-07
GNG12	5.24272e-09	-0.571319	0.609	0.789	0.000113259
CAPRIN1	4.4285e-12	-0.572184	0.449	0.698	9.5669e-08
LRRC75A-AS1	7.29824e-09	-0.573083	0.833	0.943	0.000157664
NEK9	4.63472e-22	-0.573245	0.065	0.549	1.00124e-17
GOLGB1	2.12387e-09	-0.573831	0.384	0.655	4.58819e-05
CAPN1	6.6485e-10	-0.573987	0.254	0.583	1.43628e-05
HGSNAT	5.37186e-18	-0.574434	0.159	0.596	1.16048e-13
TFDP1	6.3635e-19	-0.574805	0.072	0.515	1.37471e-14
TFRC	1.57499e-13	-0.57518	0.159	0.54	3.40246e-09
MT-ATP8	5.67064e-18	-0.575552	0.986	0.993	1.22503e-13
SSB	5.7608e-16	-0.576188	0.304	0.678	1.24451e-11
WDR1	4.9036e-08	-0.576731	0.536	0.751	0.00105933
UBLCP1	3.68887e-20	-0.577064	0.094	0.556	7.96907e-16
PSMB6	2.48954e-15	-0.578064	0.319	0.705	5.37815e-11
HOXB7	2.74417e-15	-0.578402	0.217	0.615	5.92824e-11
SPCS1	2.76768e-12	-0.578615	0.362	0.692	5.97902e-08
ADGRL2	2.92314e-10	-0.578738	0.37	0.66	6.31486e-06
ANXA6	8.65991e-09	-0.579041	0.507	0.78	0.00018708
SLC3A2	9.47917e-10	-0.579292	0.63	0.782	2.04779e-05
MYL12B	4.93398e-09	-0.57964	0.703	0.873	0.000106589
PARP9	4.88529e-24	-0.579786	0.007	0.506	1.05537e-19
PDE1C	2.83814e-11	-0.579858	0.116	0.433	6.13123e-07
ZMYND11	1.96494e-16	-0.580375	0.145	0.574	4.24485e-12
IL33	0.0149582	-0.580514	0.442	0.594	1
HMGN1	1.74183e-09	-0.580791	0.616	0.789	3.76287e-05
TSEN15	1.69716e-21	-0.583059	0.058	0.535	3.66637e-17
IFI30	1.1306e-14	-0.584158	0.239	0.635	2.44243e-10
DNAJA1	6.00524e-10	-0.587254	0.493	0.726	1.29731e-05
ZNFX1	1.01525e-13	-0.589117	0.246	0.61	2.19324e-09
FLNA	4.83078e-08	-0.589195	0.732	0.85	0.00104359
PSMC5	2.50301e-15	-0.589243	0.326	0.683	5.40725e-11
PHF14	1.1772e-21	-0.59023	0.072	0.556	2.5431e-17
TMEM106B	2.46844e-16	-0.590932	0.29	0.685	5.33256e-12
ANKRD40	9.0744e-17	-0.590988	0.225	0.653	1.96034e-12
ATP5G1	1.61168e-19	-0.591472	0.138	0.621	3.48171e-15
SAMD9L	5.17652e-23	-0.591486	0.043	0.531	1.11828e-18
SUB1	5.31681e-11	-0.592148	0.587	0.762	1.14859e-06
COPS8	6.85564e-11	-0.592374	0.377	0.685	1.48102e-06
CREG1	5.15252e-14	-0.592585	0.304	0.651	1.1131e-09
ZFP36L2	5.6938e-08	-0.593201	0.471	0.719	0.00123003
CMTM3	3.79646e-19	-0.593601	0.181	0.63	8.20148e-15
TMEM127	6.11806e-21	-0.593864	0.116	0.608	1.32169e-16
PSMB10	3.85622e-18	-0.594181	0.13	0.551	8.3306e-14
SVIL	6.75925e-20	-0.594463	0.051	0.508	1.4602e-15
AKR1C1	3.37487e-14	-0.594478	0.138	0.522	7.29073e-10
SYNCRIP	5.75298e-13	-0.59687	0.486	0.746	1.24282e-08
DNAJC8	2.69046e-13	-0.597667	0.239	0.624	5.81221e-09
SLC25A39	9.7787e-11	-0.598607	0.399	0.735	2.11249e-06
PHF20L1	9.46338e-17	-0.599134	0.21	0.619	2.04437e-12
LGALS3	7.55296e-10	-0.599408	0.623	0.796	1.63167e-05
FAS	1.30039e-17	-0.599576	0.152	0.565	2.80923e-13
CCT6A	4.7916e-10	-0.600744	0.464	0.71	1.03513e-05
CDH2	1.39085e-10	-0.600748	0.29	0.615	3.00465e-06
HMOX1	4.35227e-11	-0.600805	0.08	0.383	9.40222e-07
UBE2S	1.52872e-11	-0.600873	0.152	0.494	3.30249e-07
AP2M1	7.02486e-12	-0.600947	0.746	0.864	1.51758e-07
NDUFC2	6.13353e-17	-0.603435	0.217	0.619	1.32503e-12
DYNC1LI2	3.80373e-09	-0.605234	0.428	0.701	8.21719e-05
CALM3	5.1041e-09	-0.606206	0.42	0.685	0.000110264
ADD3	8.40031e-12	-0.608358	0.688	0.814	1.81472e-07
MDFIC	2.05254e-14	-0.6088	0.326	0.671	4.43411e-10
GOLIM4	1.77719e-14	-0.609297	0.362	0.73	3.83926e-10
ABCA9	3.93478e-19	-0.609718	0.109	0.551	8.50031e-15
C7	2.73278e-11	-0.61067	0.101	0.422	5.90362e-07
VPS25	2.03249e-20	-0.610683	0.145	0.601	4.39078e-16
TIMP2	2.04919e-12	-0.610981	0.928	0.973	4.42686e-08
NFIX	8.71885e-12	-0.611005	0.638	0.825	1.88353e-07
HPS1	1.41022e-16	-0.611257	0.21	0.61	3.0465e-12
GDE1	1.04338e-15	-0.61278	0.254	0.649	2.25401e-11
MRPS10	1.68168e-16	-0.613788	0.203	0.624	3.63293e-12
PDLIM7	3.44434e-16	-0.613876	0.232	0.653	7.44082e-12
TRIP12	2.93618e-12	-0.614357	0.319	0.649	6.34303e-08
DECR1	4.41093e-19	-0.614587	0.152	0.615	9.52893e-15
ERH	8.99777e-14	-0.614879	0.384	0.701	1.94379e-09
NDUFB6	1.4034e-17	-0.614901	0.196	0.628	3.03177e-13
STXBP5	6.05041e-17	-0.615177	0.203	0.612	1.30707e-12
COX6C	1.02696e-10	-0.6157	0.514	0.776	2.21855e-06
TRIM44	1.92913e-12	-0.616006	0.399	0.71	4.1675e-08
MARCKSL1	1.50123e-12	-0.616782	0.341	0.683	3.2431e-08
ACTN4	3.65627e-09	-0.617014	0.572	0.787	7.89863e-05
MARVELD1	1.16374e-22	-0.617374	0.094	0.592	2.51404e-18
NDUFA13	2.01315e-17	-0.617783	0.246	0.683	4.34901e-13
SOD1	4.46096e-14	-0.618936	0.457	0.782	9.637e-10
AASDHPPT	1.46488e-21	-0.618961	0.094	0.585	3.16459e-17
SYT1	1.17175e-16	-0.619406	0.116	0.533	2.53133e-12
HSPD1	2.40319e-14	-0.619717	0.384	0.719	5.19161e-10
NBN	2.47807e-20	-0.619874	0.109	0.565	5.35337e-16
SKP1	5.52976e-13	-0.622092	0.529	0.791	1.19459e-08
RAB27B	6.31825e-17	-0.622699	0.123	0.54	1.36493e-12
YBX1	1.22163e-08	-0.624553	0.812	0.921	0.000263909
DYNLRB1	9.16083e-10	-0.624668	0.464	0.746	1.97901e-05
ITGA11	8.37133e-16	-0.625677	0.181	0.567	1.80846e-11
PDE1A	1.57152e-23	-0.627347	0.065	0.565	3.39495e-19
ARPC4	5.60991e-16	-0.627957	0.29	0.689	1.21191e-11
TRIM22	4.94748e-22	-0.629331	0.043	0.526	1.0688e-17
TMEM126B	2.04336e-23	-0.629362	0.043	0.556	4.41426e-19
BTF3L4	1.75225e-20	-0.630457	0.174	0.642	3.78538e-16
TUBA1A	7.33799e-08	-0.630768	0.442	0.662	0.00158523
TMEM43	7.00944e-19	-0.63087	0.159	0.61	1.51425e-14
ACTR10	7.71943e-19	-0.632259	0.145	0.587	1.66763e-14
PIK3R2	5.57729e-14	-0.632379	0.29	0.683	1.20486e-09
ASNS	4.33339e-17	-0.633515	0.174	0.619	9.36142e-13
NFIB	1.18019e-16	-0.635827	0.203	0.628	2.54957e-12
ACVR2A	6.80053e-21	-0.637502	0.029	0.488	1.46912e-16
CLIP1	3.67734e-13	-0.639144	0.29	0.651	7.94415e-09
C6orf120	1.03754e-22	-0.63917	0.051	0.549	2.2414e-18
TLE4	7.91114e-13	-0.639381	0.312	0.646	1.70904e-08
FADS1	8.68672e-12	-0.63953	0.486	0.757	1.87659e-07
ACTR2	1.10682e-14	-0.641549	0.442	0.744	2.39106e-10
SEPHS2	8.19215e-24	-0.642168	0.051	0.556	1.76975e-19
PPIC	1.31376e-16	-0.642176	0.283	0.678	2.83811e-12
EIF5B	1.14894e-16	-0.64238	0.319	0.728	2.48206e-12
PGD	1.63829e-14	-0.642704	0.413	0.757	3.53919e-10
GPR1	1.65472e-21	-0.642789	0.014	0.483	3.5747e-17
FGF7	4.96768e-18	-0.643483	0.145	0.587	1.07317e-13
CLCN3	2.01529e-17	-0.643645	0.167	0.59	4.35362e-13
ASNA1	7.8654e-17	-0.643767	0.232	0.653	1.69916e-12
HS2ST1	1.25199e-14	-0.644106	0.203	0.605	2.70467e-10
PIP4K2B	1.70134e-12	-0.64483	0.384	0.723	3.67541e-08
VPS13C	8.4902e-18	-0.645069	0.152	0.569	1.83414e-13
ANAPC5	2.66153e-21	-0.645077	0.159	0.642	5.7497e-17
ANXA1	1.19191e-10	-0.645237	0.71	0.882	2.57489e-06
TP53	6.61479e-25	-0.645592	0.058	0.585	1.42899e-20
ABCA6	9.67085e-24	-0.645829	0.036	0.54	2.08919e-19
CD59	1.48427e-07	-0.64624	0.783	0.884	0.00320647
UBE2L6	2.53966e-15	-0.646699	0.326	0.683	5.48643e-11
HMGN2	1.07223e-13	-0.647992	0.297	0.655	2.31634e-09
PARK7	4.22531e-14	-0.648453	0.5	0.794	9.12793e-10
IGF2R	4.51851e-12	-0.649645	0.514	0.741	9.76133e-08
PDZRN3	3.14581e-18	-0.649839	0.109	0.533	6.79589e-14
SLC38A1	4.44743e-16	-0.650584	0.21	0.61	9.60779e-12
MSN	2.51318e-10	-0.650589	0.507	0.773	5.42923e-06
EMP3	1.56103e-13	-0.651566	0.717	0.814	3.37229e-09
H2AFV	4.38373e-17	-0.652017	0.21	0.612	9.47016e-13
HMCN1	5.72696e-14	-0.653015	0.217	0.583	1.23719e-09
CCT7	2.00322e-17	-0.653258	0.304	0.689	4.32756e-13
BANF1	3.99902e-13	-0.653409	0.435	0.769	8.63908e-09
RNH1	5.73154e-12	-0.654143	0.464	0.726	1.23818e-07
CASC4	1.32795e-15	-0.654366	0.326	0.717	2.86878e-11
PHLDA1	2.13257e-06	-0.656149	0.71	0.785	0.04607
TBC1D5	6.10237e-22	-0.656624	0.152	0.649	1.3183e-17
BDH2	5.72135e-20	-0.656923	0.138	0.601	1.23598e-15
C6orf62	2.9841e-15	-0.658759	0.341	0.694	6.44656e-11
LINC01133	3.84917e-21	-0.659704	0.058	0.528	8.31536e-17
UQCRQ	1.8164e-14	-0.660589	0.58	0.832	3.92396e-10
NBR1	3.15504e-13	-0.660759	0.341	0.696	6.81583e-09
SNX17	3.58099e-19	-0.662106	0.225	0.655	7.736e-15
ANXA4	7.25319e-20	-0.662754	0.109	0.574	1.56691e-15
PDAP1	9.6528e-17	-0.663158	0.29	0.696	2.08529e-12
STAT6	3.19129e-15	-0.664068	0.348	0.719	6.89415e-11
UBA1	1.9629e-13	-0.664088	0.732	0.855	4.24045e-09
ENG	2.4633e-14	-0.664223	0.471	0.762	5.32146e-10
CDK2AP1	9.19257e-11	-0.664419	0.696	0.889	1.98587e-06
CDC123	1.90348e-21	-0.664933	0.13	0.605	4.11209e-17
BCYRN1	2.65744e-06	-0.665032	0.217	0.442	0.0574087
FOS	5.00223e-08	-0.665217	0.449	0.721	0.00108063
ATIC	1.43915e-22	-0.667735	0.087	0.585	3.109e-18
TADA3	1.56905e-17	-0.669171	0.348	0.723	3.38963e-13
ARPC5	1.04035e-13	-0.670218	0.362	0.685	2.24747e-09
ANXA2	4.03568e-07	-0.67132	0.812	0.884	0.00871829
LEPROT	1.07179e-14	-0.671587	0.493	0.757	2.31539e-10
HINT1	1.58764e-11	-0.674226	0.565	0.83	3.42979e-07
GSN	6.73863e-13	-0.675232	0.435	0.746	1.45575e-08
PPP1R3C	1.60851e-17	-0.675783	0.058	0.476	3.47487e-13
ATP5J	3.57541e-12	-0.678786	0.449	0.737	7.72395e-08
XRCC5	3.77524e-13	-0.68153	0.486	0.739	8.15564e-09
RDH10	1.50313e-10	-0.681805	0.225	0.549	3.2472e-06
CNPY2	4.75622e-22	-0.682322	0.167	0.642	1.02749e-17
TP53I11	7.99204e-16	-0.682376	0.333	0.723	1.72652e-11
CDC42BPA	1.97102e-16	-0.68329	0.326	0.68	4.25799e-12
ANAPC13	5.6516e-16	-0.683713	0.341	0.685	1.22091e-11
SH3BGRL	1.7721e-12	-0.683741	0.442	0.741	3.82826e-08
NDUFA12	1.97228e-17	-0.683932	0.167	0.59	4.26072e-13
ACTA2	3.30431e-16	-0.683993	0.13	0.519	7.1383e-12
MT-ND5	3.01729e-27	-0.684039	1	1	6.51826e-23
ASPN	6.2929e-17	-0.68479	0.123	0.542	1.35946e-12
FAM20A	1.39042e-21	-0.685005	0.058	0.533	3.00373e-17
H1FX	7.87143e-15	-0.686361	0.254	0.66	1.70047e-10
C7orf73	2.87055e-21	-0.690015	0.239	0.701	6.20125e-17
SPTSSA	2.43729e-08	-0.690318	0.399	0.669	0.000526529
ADI1	6.75886e-21	-0.690608	0.174	0.642	1.46012e-16
PLAU	1.57349e-05	-0.692014	0.268	0.485	0.339921
SHC1	5.25018e-18	-0.692278	0.275	0.669	1.1342e-13
C1orf122	2.33589e-15	-0.692555	0.29	0.673	5.04622e-11
EEF1B2	7.35918e-12	-0.693616	0.717	0.896	1.5898e-07
PTPN11	4.49001e-09	-0.695712	0.478	0.735	9.69977e-05
TXNRD1	1.27935e-13	-0.697463	0.406	0.746	2.76377e-09
DNAJC10	1.28033e-16	-0.699508	0.319	0.707	2.76591e-12
TIMMDC1	5.23046e-23	-0.700448	0.138	0.639	1.12994e-18
CYB5R3	2.49129e-06	-0.70191	0.645	0.859	0.0538193
S100A11	1.26913e-10	-0.704776	0.906	0.948	2.7417e-06
FAM129B	2.25981e-11	-0.704807	0.58	0.796	4.88186e-07
TRANK1	3.17444e-20	-0.704858	0.072	0.54	6.85774e-16
EIF4EBP2	5.37857e-19	-0.704903	0.254	0.676	1.16193e-14
HNRNPA1	6.42704e-11	-0.705071	0.652	0.83	1.38843e-06
ISCU	4.26074e-14	-0.705458	0.471	0.748	9.20447e-10
SEPT7	1.78086e-13	-0.70635	0.623	0.805	3.8472e-09
SPDL1	2.29005e-19	-0.708539	0.022	0.454	4.94718e-15
TMEM14C	1.89797e-16	-0.708941	0.355	0.712	4.1002e-12
PEBP1	4.02699e-12	-0.709426	0.594	0.821	8.69952e-08
TMEM179B	3.49203e-18	-0.712569	0.254	0.683	7.54383e-14
CCT3	2.73628e-20	-0.713427	0.225	0.649	5.91118e-16
IFI16	2.46778e-14	-0.715218	0.406	0.721	5.33115e-10
PSME2	5.19961e-19	-0.715654	0.275	0.714	1.12327e-14
ARF3	4.98953e-16	-0.715793	0.391	0.744	1.07789e-11
CDKN2B	9.59477e-22	-0.716797	0.022	0.49	2.07276e-17
DSTN	2.20577e-11	-0.717219	0.667	0.864	4.76512e-07
GPX8	7.91927e-14	-0.717273	0.565	0.773	1.7108e-09
CCPG1	2.38108e-20	-0.717431	0.159	0.633	5.14385e-16
PLAC9	3.46551e-19	-0.718389	0.174	0.619	7.48654e-15
FAM129A	2.20202e-19	-0.719263	0.203	0.649	4.75702e-15
NNMT	3.87967e-16	-0.72091	0.275	0.642	8.38124e-12
KGFLP2	4.02889e-25	-0.721283	0.043	0.558	8.70362e-21
ARHGAP1	2.63763e-16	-0.721334	0.333	0.714	5.69807e-12
CACNA2D1	9.67364e-22	-0.723976	0.138	0.637	2.0898e-17
APOL6	2.91255e-15	-0.724102	0.348	0.689	6.29197e-11
ZCRB1	1.6377e-14	-0.724191	0.333	0.685	3.53792e-10
SH3PXD2A	2.95164e-10	-0.72436	0.348	0.639	6.37642e-06
FAM210B	1.28474e-22	-0.726433	0.203	0.685	2.77542e-18
SEL1L	2.08675e-15	-0.729327	0.435	0.737	4.50801e-11
SLFN5	1.51375e-18	-0.731178	0.203	0.619	3.27015e-14
HNRNPA2B1	1.05181e-13	-0.732334	0.638	0.803	2.27223e-09
PHB	4.68522e-19	-0.733	0.225	0.669	1.01215e-14
FZD2	1.80843e-24	-0.733301	0.123	0.642	3.90675e-20
ECH1	1.43392e-18	-0.734683	0.261	0.683	3.0977e-14
ANXA11	2.85012e-17	-0.736603	0.362	0.701	6.15711e-13
PRSS23	6.60021e-12	-0.738978	0.449	0.766	1.42584e-07
MYH9	1.70585e-14	-0.739179	0.746	0.878	3.68515e-10
PSMD1	1.2714e-18	-0.739911	0.261	0.671	2.7466e-14
FKBP3	7.09634e-21	-0.740597	0.159	0.633	1.53302e-16
VCAN	1.48904e-11	-0.740886	0.848	0.905	3.21678e-07
NEK7	1.45242e-09	-0.741717	0.435	0.703	3.13766e-05
RPS27L	2.39984e-13	-0.742539	0.638	0.812	5.18437e-09
ABCA8	2.63243e-26	-0.742935	0.051	0.596	5.68684e-22
SMARCE1	5.04366e-17	-0.744742	0.384	0.73	1.08958e-12
CBX5	7.89505e-18	-0.744985	0.341	0.705	1.70557e-13
METTL7A	3.34141e-18	-0.746599	0.123	0.553	7.21844e-14
ATP5J2	8.0655e-16	-0.751395	0.413	0.755	1.74239e-11
TBCB	9.20193e-22	-0.751473	0.203	0.698	1.98789e-17
ANTXR2	6.23616e-14	-0.753957	0.587	0.796	1.3472e-09
MN1	5.6212e-24	-0.756727	0.058	0.576	1.21435e-19
DYNLT1	6.38259e-18	-0.757127	0.326	0.714	1.37883e-13
RPS6KA2	7.17969e-18	-0.757294	0.217	0.653	1.55103e-13
ARID5B	5.80764e-14	-0.757919	0.384	0.701	1.25462e-09
IER2	9.21754e-05	-0.759549	0.536	0.649	1
CTSL	9.26882e-15	-0.759991	0.428	0.741	2.00234e-10
SYNPO2	1.00369e-21	-0.761063	0.072	0.544	2.16828e-17
HSPE1	2.85722e-20	-0.761278	0.21	0.667	6.17245e-16
POLR2L	1.13975e-14	-0.763723	0.449	0.773	2.4622e-10
ADAMTS5	2.62089e-17	-0.764395	0.08	0.515	5.66192e-13
MAPKAP1	7.6333e-24	-0.764573	0.138	0.646	1.64902e-19
SPTBN1	1.8907e-11	-0.764788	0.587	0.839	4.08449e-07
DDX5	3.85195e-15	-0.765332	0.761	0.821	8.32137e-11
TGFBR2	1.22141e-19	-0.767533	0.21	0.662	2.6386e-15
C17orf89	1.31239e-23	-0.774598	0.116	0.624	2.83516e-19
KLF4	6.85569e-16	-0.77718	0.232	0.635	1.48103e-11
CNP	1.42012e-23	-0.777412	0.174	0.653	3.06789e-19
MRFAP1	2.78281e-15	-0.777743	0.623	0.807	6.01171e-11
CCND1	0.164944	-0.778034	0.623	0.669	1
GALNT1	6.57055e-21	-0.778802	0.21	0.68	1.41944e-16
DYNC1I2	1.28451e-17	-0.779479	0.37	0.732	2.77493e-13
PCDH18	5.56911e-22	-0.779965	0.145	0.619	1.20309e-17
RAD50	2.07282e-23	-0.785864	0.138	0.633	4.47792e-19
FIBIN	3.70094e-23	-0.786458	0	0.483	7.99515e-19
MAP1B	6.96169e-08	-0.786832	0.652	0.853	0.00150393
TMBIM4	2.97034e-17	-0.786849	0.348	0.71	6.41683e-13
SLC38A10	2.01807e-20	-0.791987	0.268	0.683	4.35964e-16
SULF1	2.43339e-14	-0.792027	0.123	0.49	5.25686e-10
SLC6A9	5.37687e-26	-0.795504	0.051	0.585	1.16157e-21
MARS	1.35213e-18	-0.801186	0.312	0.696	2.921e-14
CTSK	3.72555e-14	-0.805098	0.609	0.83	8.0483e-10
CDC25B	5.27409e-21	-0.806217	0.138	0.608	1.13936e-16
TPM4	6.41913e-16	-0.80703	0.862	0.948	1.38672e-11
LAMTOR1	1.43066e-25	-0.80789	0.116	0.649	3.09067e-21
LPAR1	1.51472e-17	-0.809134	0.355	0.703	3.27225e-13
ITPRIPL2	1.17099e-23	-0.810296	0.138	0.624	2.5297e-19
DBI	6.63124e-12	-0.810709	0.37	0.717	1.43255e-07
CCT5	9.61165e-20	-0.8112	0.326	0.73	2.0764e-15
PKD2	2.97892e-18	-0.811883	0.391	0.757	6.43537e-14
PKDCC	1.36407e-15	-0.812277	0.348	0.692	2.9468e-11
CRISPLD2	2.40456e-15	-0.812304	0.232	0.624	5.19457e-11
LARS	8.34824e-25	-0.813094	0.145	0.646	1.80347e-20
C1S	4.95648e-19	-0.813407	0.913	0.939	1.07075e-14
EPRS	6.52817e-19	-0.813988	0.283	0.673	1.41028e-14
NCL	3.22508e-19	-0.814879	0.406	0.746	6.96713e-15
CALM1	4.06822e-17	-0.817895	0.558	0.821	8.78857e-13
TCEA1	9.7808e-15	-0.818608	0.652	0.807	2.11295e-10
NFE2L1	1.27401e-15	-0.818761	0.71	0.834	2.75224e-11
SH3D19	1.64896e-26	-0.821205	0.101	0.63	3.56224e-22
CREB3L1	2.7316e-13	-0.821791	0.717	0.839	5.90108e-09
SOCS3	4.28505e-19	-0.822672	0.145	0.587	9.257e-15
UBB	1.94377e-15	-0.822981	0.819	0.902	4.19913e-11
PSD3	1.74649e-13	-0.826212	0.486	0.748	3.77295e-09
HSPB6	4.61026e-18	-0.826233	0.949	0.998	9.95955e-14
ADAM12	1.43026e-17	-0.826612	0.159	0.558	3.08978e-13
CDIPT	1.56694e-21	-0.827425	0.225	0.685	3.38506e-17
C11orf58	7.00641e-21	-0.829971	0.304	0.712	1.51359e-16
RAB13	1.32e-10	-0.831637	0.623	0.834	2.85161e-06
ALDH1L2	4.21025e-23	-0.832612	0.138	0.633	9.0954e-19
NME1	1.10099e-26	-0.834156	0.094	0.626	2.37847e-22
LOXL4	1.81068e-15	-0.838013	0.036	0.399	3.91161e-11
NQO1	8.61359e-16	-0.838533	0.268	0.658	1.86079e-11
HNRNPAB	6.89031e-21	-0.841945	0.268	0.714	1.48851e-16
MRPL3	4.35487e-23	-0.847497	0.152	0.626	9.40782e-19
HSP90AA1	1.11766e-18	-0.851277	0.746	0.893	2.41448e-14
NUCKS1	4.85057e-18	-0.851584	0.681	0.83	1.04787e-13
CDC42EP1	9.50445e-17	-0.851651	0.457	0.746	2.05325e-12
SAMD9	1.19036e-24	-0.852132	0.08	0.592	2.57153e-20
MT-ND2	2.59216e-29	-0.854188	1	1	5.59984e-25
SARS	1.89232e-17	-0.854586	0.449	0.757	4.08799e-13
COPS6	9.74982e-20	-0.855617	0.348	0.735	2.10625e-15
TXN	1.38472e-12	-0.857061	0.703	0.857	2.99142e-08
CALM2	2.81039e-15	-0.857616	0.674	0.83	6.07129e-11
DCTN1	1.10217e-18	-0.857676	0.435	0.787	2.38101e-14
CCDC71L	5.32376e-22	-0.85904	0.13	0.61	1.15009e-17
RAB10	3.63994e-20	-0.861108	0.355	0.744	7.86336e-16
CENPB	1.67508e-25	-0.862627	0.145	0.683	3.61867e-21
C3	1.76945e-19	-0.865928	0.08	0.54	3.82254e-15
NFIA	1.89233e-21	-0.870233	0.167	0.644	4.088e-17
COPS7A	5.7661e-25	-0.870929	0.181	0.667	1.24565e-20
ADH5	3.26106e-15	-0.871175	0.543	0.76	7.04487e-11
GPS2	1.65841e-17	-0.871712	0.319	0.714	3.58267e-13
CDH11	1.36865e-16	-0.874056	0.486	0.78	2.95669e-12
SCP2	1.03583e-19	-0.875987	0.29	0.735	2.2377e-15
PHGDH	7.22585e-21	-0.876392	0.254	0.683	1.561e-16
TPST1	1.09452e-23	-0.8764	0.196	0.673	2.3645e-19
TRIOBP	2.47502e-20	-0.882512	0.37	0.741	5.34679e-16
DPP4	2.54254e-15	-0.885727	0.587	0.81	5.49266e-11
SETD7	2.79618e-22	-0.886043	0.297	0.741	6.04059e-18
DPYSL3	7.12875e-20	-0.886435	0.413	0.766	1.54002e-15
TPM1	5.62341e-12	-0.887817	0.486	0.748	1.21482e-07
IDH1	4.09776e-25	-0.888684	0.196	0.703	8.85239e-21
SH3BGRL3	0.0016684	-0.893488	0.928	0.975	1
MAP4K4	5.77388e-16	-0.897999	0.42	0.762	1.24733e-11
YWHAQ	5.61963e-21	-0.898964	0.652	0.862	1.21401e-16
FUT8	2.87305e-26	-0.899266	0.123	0.653	6.20664e-22
KANK2	9.59486e-26	-0.900811	0.145	0.673	2.07278e-21
LOXL1	1.43221e-25	-0.901282	0.13	0.68	3.094e-21
SCARA3	3.13892e-18	-0.908708	0.319	0.755	6.781e-14
ADH1B	6.59404e-15	-0.912022	0.007	0.347	1.42451e-10
PSMA4	6.50542e-28	-0.914291	0.138	0.673	1.40537e-23
MAN2A1	2.46115e-15	-0.917486	0.688	0.805	5.31682e-11
SPARC	1.87059e-18	-0.918379	0.964	0.966	4.04104e-14
ADAR	4.49299e-18	-0.918445	0.391	0.726	9.7062e-14
CAPZA1	4.0356e-20	-0.919144	0.5	0.81	8.71811e-16
CXCL3	7.64003e-15	-0.920292	0.065	0.426	1.65047e-10
CCL11	1.77719e-15	-0.921352	0.014	0.37	3.83927e-11
PLCB1	4.15926e-21	-0.923298	0.145	0.624	8.98524e-17
PRKAR1A	6.58556e-24	-0.926176	0.804	0.918	1.42268e-19
SERBP1	1.98204e-19	-0.927128	0.507	0.776	4.28181e-15
HSPA8	2.35188e-18	-0.928303	0.725	0.862	5.08078e-14
MAN1A1	1.33765e-17	-0.92832	0.514	0.764	2.88972e-13
MT-CO2	2.35656e-34	-0.936507	1	1	5.09087e-30
PCDH7	3.49139e-19	-0.941957	0.232	0.642	7.54244e-15
SIGMAR1	7.11082e-27	-0.942327	0.152	0.689	1.53615e-22
GNG11	1.36827e-15	-0.951859	0.522	0.803	2.95587e-11
NRP1	2.08793e-16	-0.955301	0.63	0.807	4.51055e-12
MPV17	6.12805e-21	-0.955619	0.377	0.78	1.32384e-16
PRKDC	3.38692e-26	-0.958169	0.159	0.669	7.31677e-22
SH3KBP1	7.31881e-23	-0.960535	0.29	0.746	1.58108e-18
ZBTB20	3.08063e-17	-0.966017	0.449	0.76	6.65509e-13
CSRP1	9.15284e-19	-0.968168	0.442	0.798	1.97729e-14
MT-CO1	2.21431e-30	-0.973124	1	1	4.78357e-26
BCHE	4.08305e-24	-0.974927	0.174	0.685	8.8206e-20
G6PC3	5.97857e-25	-0.98584	0.246	0.73	1.29155e-20
NDUFA4	6.1832e-21	-0.990401	0.529	0.844	1.33576e-16
PTMS	7.97339e-20	-0.992935	0.681	0.909	1.72249e-15
MFAP2	1.47343e-21	-0.993735	0.312	0.726	3.18305e-17
POSTN	2.20942e-11	-0.993993	0.123	0.44	4.77301e-07
EEA1	1.95586e-19	-1.00944	0.399	0.748	4.22525e-15
COL5A1	1.18984e-16	-1.01326	0.681	0.798	2.5704e-12
ANTXR1	6.16495e-25	-1.02367	0.312	0.766	1.33181e-20
TUBA1B	8.99276e-10	-1.02984	0.58	0.789	1.94271e-05
ERAP2	3.93628e-24	-1.03118	0.29	0.751	8.50354e-20
G6PD	3.20362e-26	-1.03274	0.239	0.766	6.92077e-22
EPAS1	2.965e-20	-1.03489	0.442	0.778	6.40528e-16
MT-ND1	3.08384e-41	-1.03561	1	1	6.66202e-37
APEX1	4.61322e-24	-1.03903	0.319	0.741	9.96593e-20
MTHFD2	1.95038e-21	-1.04117	0.283	0.712	4.2134e-17
STAT1	3.1836e-27	-1.04268	0.181	0.703	6.87753e-23
SERPINH1	5.6643e-16	-1.04655	0.703	0.787	1.22366e-11
MYL9	1.73455e-07	-1.04656	0.558	0.78	0.00374716
COMT	6.48277e-24	-1.04656	0.362	0.782	1.40047e-19
SRP9	4.46227e-25	-1.05052	0.42	0.796	9.63984e-21
SEP15	5.01772e-24	-1.05119	0.471	0.812	1.08398e-19
MAP1A	5.5078e-24	-1.05143	0.319	0.757	1.18985e-19
HMGB1	1.26441e-22	-1.05199	0.572	0.794	2.73151e-18
SPTAN1	3.21272e-22	-1.0597	0.486	0.794	6.94044e-18
KCNMA1	1.66915e-21	-1.06207	0.326	0.744	3.60587e-17
SERPINF1	2.80101e-18	-1.06293	0.522	0.803	6.05101e-14
FTH1	1.13842e-25	-1.06951	1	0.991	2.45933e-21
CDK4	7.59618e-25	-1.07068	0.384	0.757	1.641e-20
MT-CO3	4.19308e-41	-1.07284	1	1	9.05832e-37
CXCL12	3.46266e-19	-1.07857	0.072	0.515	7.48038e-15
IGF1	7.18722e-24	-1.07987	0.007	0.506	1.55266e-19
IFITM3	2.93784e-34	-1.08045	0.92	0.971	6.34661e-30
LAMC1	7.16139e-26	-1.0861	0.761	0.88	1.54708e-21
TMEM230	3.78823e-28	-1.08761	0.391	0.814	8.18371e-24
PRDX3	3.94751e-28	-1.08937	0.203	0.746	8.52782e-24
SRM	9.17346e-27	-1.08949	0.297	0.776	1.98174e-22
CFL1	9.78326e-29	-1.09391	0.899	0.973	2.11348e-24
ANGPTL2	7.53494e-30	-1.09469	0.109	0.676	1.62777e-25
PXDN	6.11838e-20	-1.0955	0.638	0.816	1.32175e-15
SEPT2	1.77005e-27	-1.0982	0.674	0.88	3.82385e-23
ZMAT3	2.01632e-23	-1.1007	0.333	0.748	4.35586e-19
ITGB8	2.22471e-28	-1.10436	0.029	0.592	4.80604e-24
MFAP4	1.81825e-19	-1.11123	0.732	0.866	3.92796e-15
SLC1A5	7.84274e-22	-1.11508	0.384	0.746	1.69427e-17
MXRA8	1.46983e-19	-1.11828	0.58	0.816	3.17527e-15
RSU1	5.08384e-29	-1.1273	0.225	0.764	1.09826e-24
THY1	1.8153e-20	-1.13205	0.551	0.882	3.9216e-16
MDK	3.88908e-31	-1.13906	0.761	0.932	8.40158e-27
PSME3	2.05331e-34	-1.14861	0.087	0.71	4.43577e-30
NREP	5.09523e-23	-1.16746	0.174	0.637	1.10072e-18
DYNLL1	2.05506e-26	-1.1852	0.486	0.821	4.43955e-22
SEPT11	1.9483e-22	-1.18559	0.377	0.764	4.20891e-18
MT-ND3	6.11639e-43	-1.19488	1	1	1.32132e-38
COPZ2	1.03763e-31	-1.21407	0.203	0.748	2.24159e-27
IGFBP5	1.32362e-13	-1.21756	0.877	0.982	2.85942e-09
GLIPR1	1.29298e-23	-1.21842	0.188	0.676	2.79322e-19
TAGLN	1.40768e-08	-1.21952	0.37	0.626	0.0003041
PBX1	2.17562e-30	-1.22549	0.174	0.719	4.69998e-26
SLC7A11	1.84276e-24	-1.22826	0.239	0.732	3.98091e-20
PARVA	2.63735e-35	-1.23991	0.203	0.807	5.69747e-31
GPX1	3.29705e-28	-1.24155	0.594	0.864	7.12263e-24
IARS	1.41404e-27	-1.2773	0.29	0.757	3.05475e-23
H3F3B	9.07759e-24	-1.30373	0.717	0.819	1.96103e-19
FKBP1A	1.78541e-25	-1.31748	0.536	0.875	3.85702e-21
PLAT	1.39123e-19	-1.32808	0.768	0.93	3.00548e-15
FLRT2	3.25216e-33	-1.33522	0.123	0.71	7.02564e-29
PRKCDBP	7.42746e-29	-1.33601	0.196	0.728	1.60456e-24
NAV1	4.30449e-25	-1.33632	0.413	0.753	9.299e-21
RAB31	5.56507e-26	-1.34259	0.413	0.807	1.20222e-21
CFB	6.58301e-23	-1.36859	0.355	0.764	1.42213e-18
MT-CYB	3.21159e-47	-1.37492	1	1	6.938e-43
KLHL5	3.78745e-30	-1.38782	0.507	0.828	8.18202e-26
CAPNS1	4.31394e-35	-1.40079	0.681	0.937	9.3194e-31
COL14A1	1.50351e-23	-1.40361	0.268	0.721	3.24803e-19
ARPC1B	1.3099e-21	-1.42371	0.428	0.8	2.82978e-17
EID1	5.00514e-35	-1.42627	0.362	0.834	1.08126e-30
UNC5B	1.44896e-29	-1.43895	0.167	0.712	3.13019e-25
SPRY1	5.92225e-32	-1.46681	0.138	0.721	1.27938e-27
EIF4G2	7.90795e-40	-1.49168	0.725	0.893	1.70835e-35
CXCL1	1.12623e-19	-1.49958	0.138	0.596	2.43299e-15
CXCL6	1.30048e-16	-1.50286	0.268	0.683	2.80943e-12
YWHAB	3.47989e-33	-1.50854	0.58	0.832	7.51761e-29
SEMA3C	2.69471e-29	-1.50923	0.341	0.794	5.82138e-25
ANK3	1.6206e-33	-1.54614	0.058	0.676	3.50098e-29
LRRC17	2.29321e-33	-1.55207	0.254	0.778	4.95403e-29
UCHL1	6.27062e-31	-1.63816	0.514	0.884	1.35464e-26
PAPPA	2.5905e-19	-1.64897	0.406	0.744	5.59625e-15
IL1R1	2.66621e-33	-1.65556	0.268	0.771	5.75982e-29
WARS	7.72762e-37	-1.65977	0.116	0.746	1.6694e-32
PDGFRA	1.64368e-26	-1.67841	0.594	0.807	3.55084e-22
IL6ST	1.2785e-41	-1.68418	0.761	0.927	2.76195e-37
SNAI2	1.98531e-33	-1.73662	0.304	0.803	4.28887e-29
CYP1B1	4.57064e-31	-1.75837	0.065	0.653	9.87396e-27
CXCL2	1.62128e-29	-1.80519	0.022	0.615	3.50245e-25
CALD1	7.03782e-43	-1.82974	0.659	0.925	1.52038e-38
CD248	4.59351e-37	-1.83336	0.13	0.751	9.92335e-33
ACTB	1.57341e-44	-1.95246	0.87	0.977	3.39903e-40
SERPINE2	4.04233e-38	-1.96587	0.848	0.986	8.73265e-34
PSAT1	1.96047e-38	-1.98648	0.094	0.748	4.2352e-34
PLPP3	1.30671e-36	-2.12254	0.167	0.769	2.82289e-32
TGM2	3.82048e-37	-2.22175	0.159	0.796	8.25338e-33
CCL2	5.75411e-36	-2.24774	0.188	0.785	1.24306e-31
CLDN11	2.45405e-41	-2.25151	0.565	0.868	5.30148e-37
CCDC80	4.16994e-35	-2.44359	0.645	0.902	9.00833e-31
HEG1	6.23242e-44	-2.54087	0.435	0.868	1.34639e-39
LINC01279	3.72578e-43	-2.80399	0.116	0.794	8.04881e-39
COL1A2	3.35733e-49	-2.97764	0.783	0.948	7.25284e-45
TMX4	2.1172e-46	-3.13715	0.326	0.902	4.57379e-42
COL3A1	5.97413e-46	-3.39469	0.681	0.923	1.29059e-41
COL1A1	7.11484e-45	-3.72549	0.935	0.934	1.53702e-40
